# Supplementary material for: Neuroblast-specific open chromatin allows the temporal transcription factor, Hunchback, to bind neuroblast-specific loci
Source: eLife. 2019 Jan 29;8:e44036. doi: 10.7554/eLife.44036 (PMC6377230; doi:10.7554/eLife.44036)
Supplement: Supplementary file 1. — The genome coordinates for Hb enriched loci in NB5-6 and NB7-4. Columns show, from left to right: chromosome arm, start of fragment, end of fragment, concentration, concentration in NB5-6, concentration in NB7-4, fold enrichment (NB5-6/NB7-4), p-value, and False Discovery Rate (FDR). [file elife-44036-supp1.xlsx]

## Sheet: 7-4
Chr	Start	End	Conc	Conc_56	Conc_74	Fold	p-value	FDR
X	12661497	12669099	15.7	15.45	15.91	-0.47	0.00519	0.0104
2R	23187438	23191677	13.25	12.98	13.48	-0.49	0.0293	0.0492
3L	5651584	5655793	14.99	14.72	15.22	-0.5	0.0131	0.0238
2L	9970474	9973809	13.89	13.62	14.12	-0.5	0.0291	0.0489
3L	21130073	21131576	11.93	11.65	12.16	-0.51	0.0177	0.0312
3L	8669828	8673512	11.33	11.05	11.57	-0.52	0.0177	0.0312
3R	10656431	10657403	10.72	10.43	10.96	-0.54	0.0243	0.0415
3L	13082536	13085633	12.9	12.61	13.15	-0.54	0.0248	0.0423
3L	13920786	13922624	9.83	9.54	10.08	-0.54	0.0265	0.0449
3L	20694429	20695548	11.87	11.57	12.12	-0.55	0.0101	0.0188
3R	8159816	8164050	11.02	10.72	11.27	-0.55	0.0176	0.0311
3L	3386541	3388847	10.49	10.19	10.73	-0.55	0.0212	0.0367
3L	13262295	13262668	8.75	8.45	9	-0.55	0.0282	0.0476
3L	11380764	11383563	10.43	10.13	10.69	-0.56	0.0208	0.036
3R	16629431	16630070	8.32	8.01	8.58	-0.56	0.023	0.0395
2L	10002174	10004897	12.48	12.17	12.73	-0.56	0.024	0.0411
2L	9582741	9590054	14.66	14.35	14.92	-0.57	0.00187	0.0041
3R	31061058	31062706	10.68	10.36	10.93	-0.58	0.0178	0.0313
X	1892750	1894198	11.81	11.49	12.07	-0.59	0.00907	0.0171
2R	25196606	25199085	12.71	12.39	12.98	-0.59	0.0138	0.0248
3R	22042264	22042714	11.55	11.23	11.82	-0.59	0.0141	0.0254
2L	19154456	19155208	12.75	12.42	13.02	-0.59	0.0159	0.0284
2R	24334608	24335299	9.92	9.59	10.18	-0.59	0.0165	0.0293
2L	11186814	11189626	10.29	9.97	10.56	-0.59	0.0219	0.0378
X	10513423	10515029	9.56	9.24	9.83	-0.59	0.0221	0.0381
3L	783108	783418	9.1	8.77	9.37	-0.6	0.0114	0.021
3R	31686878	31687247	10.19	9.86	10.46	-0.6	0.0155	0.0277
X	2462489	2463399	8.19	7.86	8.46	-0.6	0.0161	0.0286
2L	9460079	9460442	10.71	10.38	10.97	-0.6	0.0176	0.031
3R	13466240	13466852	9.28	8.95	9.55	-0.6	0.0186	0.0326
2R	13416032	13416893	9.35	9.02	9.61	-0.6	0.0193	0.0338
2L	18891517	18892556	11.96	11.63	12.23	-0.6	0.0213	0.0369
X	251319	252231	9.18	8.85	9.45	-0.6	0.0214	0.0369
3L	6830611	6832092	9.49	9.16	9.76	-0.6	0.0262	0.0445
3L	12642550	12643631	8.53	8.2	8.8	-0.6	0.0275	0.0464
2R	10541787	10548080	15.34	15	15.61	-0.61	0.00117	0.00269
3R	11350652	11354582	13.89	13.55	14.17	-0.61	0.00645	0.0126
3R	19623980	19624317	9.98	9.64	10.25	-0.61	0.0112	0.0207
3L	9742107	9742746	7.75	7.41	8.02	-0.61	0.0253	0.0431
3R	26888365	26889301	9.01	8.67	9.29	-0.61	0.0254	0.0432
2R	10537857	10538193	11.9	11.56	12.18	-0.62	0.0065	0.0127
2L	6193616	6194481	12.33	11.99	12.61	-0.62	0.00911	0.0172
3L	747015	748926	11	10.65	11.28	-0.62	0.00993	0.0185
2L	6241760	6243908	10.87	10.53	11.14	-0.62	0.0172	0.0303
3R	28579960	28580546	8.49	8.15	8.77	-0.62	0.0173	0.0305
4	504083	504774	8.53	8.18	8.8	-0.62	0.0182	0.032
2R	17804319	17805668	10.85	10.51	11.13	-0.62	0.0199	0.0347
2R	9416031	9416502	8.65	8.31	8.93	-0.62	0.0277	0.0468
3R	10433087	10434903	11.21	10.86	11.49	-0.63	0.00245	0.00524
3L	11402936	11404775	12.62	12.26	12.9	-0.63	0.00626	0.0123
X	10824897	10827660	13.56	13.21	13.84	-0.63	0.00754	0.0145
3L	2818656	2821100	10.16	9.81	10.44	-0.63	0.0149	0.0267
3L	8675156	8675794	8.93	8.58	9.21	-0.63	0.0248	0.0423
2R	13565542	13571636	15.73	15.38	16.01	-0.64	0.0013	0.00295
2R	14927267	14928647	9.02	8.67	9.3	-0.64	0.0202	0.0351
3R	23786729	23788184	9.57	9.22	9.86	-0.64	0.0282	0.0475
3R	12245122	12248355	11.86	11.5	12.14	-0.65	0.00637	0.0125
3R	29217323	29218277	9.74	9.37	10.03	-0.65	0.00735	0.0142
3R	23313924	23315406	9.33	8.97	9.62	-0.65	0.00819	0.0156
3R	27193767	27194884	11.18	10.82	11.47	-0.65	0.0183	0.032
3L	8861017	8861648	7.96	7.6	8.25	-0.65	0.0199	0.0346
3L	618801	619206	7.94	7.57	8.22	-0.65	0.0247	0.0422
X	7568211	7569321	7.74	7.38	8.03	-0.65	0.0286	0.0482
3L	744235	746253	11.81	11.44	12.1	-0.66	0.00692	0.0134
2R	23608659	23609450	11.62	11.25	11.91	-0.66	0.0112	0.0206
3L	13652013	13653267	10.56	10.19	10.85	-0.66	0.0155	0.0277
3R	4867775	4868088	7.93	7.56	8.22	-0.66	0.016	0.0286
3L	22137523	22138119	8.81	8.44	9.11	-0.66	0.0196	0.0341
2L	11066907	11067557	8	7.63	8.29	-0.66	0.0211	0.0366
2R	6584746	6588700	13.36	12.99	13.65	-0.67	0.00113	0.0026
X	19810478	19811922	9.91	9.54	10.2	-0.67	0.00503	0.01
2R	13194048	13196837	10.28	9.91	10.57	-0.67	0.00727	0.014
3R	31221147	31222555	11.71	11.34	12.01	-0.67	0.00728	0.014
2R	22310294	22311170	7.9	7.53	8.2	-0.67	0.0119	0.0218
3R	15310201	15310566	8.85	8.48	9.15	-0.67	0.0134	0.0243
3R	23785210	23785975	8.66	8.28	8.96	-0.67	0.0152	0.0273
3L	21670149	21670895	7.62	7.24	7.92	-0.67	0.0171	0.0303
3L	3544683	3546228	12.12	11.74	12.41	-0.67	0.0176	0.031
3R	24620356	24620979	8.43	8.06	8.73	-0.67	0.0181	0.0317
2L	14046506	14047245	8.22	7.85	8.52	-0.67	0.0208	0.036
2L	8848448	8848889	7.13	6.75	7.43	-0.67	0.0233	0.04
2R	10081201	10081558	8.26	7.89	8.56	-0.67	0.0289	0.0487
3L	11384058	11384711	9.96	9.58	10.26	-0.68	0.00388	0.00794
3R	26923953	26924549	8.79	8.41	9.09	-0.68	0.00782	0.015
3R	4902521	4904365	9.49	9.12	9.79	-0.68	0.00814	0.0155
X	13403455	13404837	8.66	8.28	8.96	-0.68	0.00945	0.0177
X	771158	771935	9.72	9.33	10.02	-0.68	0.00979	0.0183
3R	18296180	18297450	9.35	8.98	9.65	-0.68	0.0111	0.0204
3L	1807771	1809216	10.02	9.64	10.32	-0.68	0.0177	0.0312
3L	21643298	21645308	7.77	7.39	8.07	-0.68	0.019	0.0331
3R	16354559	16357262	10.32	9.94	10.62	-0.68	0.0233	0.04
3R	4357522	4357999	9.19	8.81	9.49	-0.68	0.0258	0.0438
X	16141288	16141728	6.95	6.57	7.25	-0.68	0.0284	0.0479
3R	16775148	16775959	7.17	6.79	7.47	-0.68	0.0287	0.0483
2R	7991768	7993559	12.64	12.26	12.94	-0.69	0.00256	0.00544
3L	320085	322236	11.21	10.83	11.52	-0.69	0.0028	0.00591
4	495438	497643	11.68	11.29	11.98	-0.69	0.00495	0.00992
2L	3780603	3781983	10.71	10.32	11.01	-0.69	0.00522	0.0104
3L	6822332	6824847	11.89	11.5	12.2	-0.69	0.00536	0.0106
3L	19163866	19164566	9.36	8.98	9.66	-0.69	0.00691	0.0134
3R	4838280	4842313	10.38	9.99	10.68	-0.69	0.0086	0.0163
3R	4863560	4864500	10.24	9.86	10.54	-0.69	0.0091	0.0171
X	9744130	9744968	8.37	7.99	8.68	-0.69	0.0105	0.0195
2R	7169985	7172705	12	11.62	12.31	-0.69	0.0113	0.0208
3L	13274055	13274583	7.49	7.11	7.8	-0.69	0.0163	0.0289
3R	5102268	5104843	14.09	13.7	14.4	-0.7	0.00111	0.00256
3L	14757987	14759564	12.29	11.9	12.6	-0.7	0.00321	0.00669
X	2298160	2299695	9.45	9.06	9.76	-0.7	0.00577	0.0114
3L	19165941	19166872	10.29	9.9	10.59	-0.7	0.00739	0.0142
3L	14663261	14664130	7.96	7.57	8.27	-0.7	0.00874	0.0165
3L	18020910	18021500	7.94	7.55	8.25	-0.7	0.00932	0.0175
3L	4345429	4347562	10.02	9.63	10.33	-0.7	0.00954	0.0179
3R	31710134	31710544	8.65	8.26	8.95	-0.7	0.0107	0.0198
2R	14002704	14004264	11.66	11.27	11.97	-0.7	0.0109	0.0202
2R	18946880	18947972	9.01	8.61	9.32	-0.7	0.0121	0.0221
3R	23310427	23311180	7.52	7.13	7.83	-0.7	0.0131	0.0237
3L	20695672	20696156	7.23	6.83	7.54	-0.7	0.0158	0.0282
3R	10570923	10573252	16.07	15.67	16.38	-0.71	3.88e-05	0.000118
3L	3409341	3410512	10.49	10.09	10.8	-0.71	0.00312	0.00653
3R	16831299	16833414	12.78	12.38	13.1	-0.71	0.00375	0.0077
3R	19571475	19572174	9.26	8.86	9.57	-0.71	0.00528	0.0105
2L	8291105	8291967	7.71	7.32	8.02	-0.71	0.0086	0.0163
3R	24595108	24596306	7.89	7.49	8.2	-0.71	0.0086	0.0163
X	11547441	11548127	7.96	7.56	8.27	-0.71	0.0101	0.0188
3L	9390836	9391696	7.99	7.6	8.3	-0.71	0.0115	0.0212
3R	31720095	31721572	9.71	9.32	10.02	-0.71	0.0117	0.0214
3L	2572438	2572909	8.79	8.4	9.1	-0.71	0.0148	0.0266
3L	4222944	4223270	9.67	9.27	9.98	-0.71	0.0169	0.0299
3R	19342830	19344931	10.34	9.95	10.65	-0.71	0.0246	0.0421
3L	18199508	18201073	9.32	8.92	9.64	-0.72	0.003	0.0063
2L	2162438	2162745	10.86	10.46	11.17	-0.72	0.0035	0.00723
2R	25016074	25017117	11.42	11.02	11.74	-0.72	0.00405	0.00825
2R	24226896	24227637	9.83	9.43	10.14	-0.72	0.00573	0.0113
3R	21515860	21517814	10.23	9.83	10.55	-0.72	0.00693	0.0134
X	7633047	7634133	7.94	7.54	8.26	-0.72	0.0106	0.0197
2R	15914796	15915305	7.9	7.5	8.21	-0.72	0.0141	0.0254
3R	30772379	30773569	10.72	10.31	11.04	-0.73	0.000569	0.00138
3R	18670325	18671442	10.58	10.17	10.9	-0.73	0.00117	0.00268
X	12006397	12008006	10.93	10.52	11.25	-0.73	0.00142	0.00321
2L	1668285	1673037	13.81	13.4	14.13	-0.73	0.0015	0.00337
2L	11048791	11049803	10.13	9.72	10.45	-0.73	0.00173	0.00384
2R	19155951	19156511	10.11	9.7	10.43	-0.73	0.00194	0.00424
3L	1690239	1690838	7.92	7.51	8.24	-0.73	0.0045	0.0091
3L	12656516	12658204	8.91	8.5	9.23	-0.73	0.00515	0.0103
3R	25596431	25598019	9.08	8.67	9.4	-0.73	0.00535	0.0106
3R	19833819	19835028	8.82	8.41	9.14	-0.73	0.00634	0.0124
3L	3390702	3391187	8.36	7.95	8.68	-0.73	0.00652	0.0127
3R	16769715	16771230	8.79	8.38	9.11	-0.73	0.00654	0.0128
3L	22188431	22188805	8.47	8.06	8.8	-0.73	0.00657	0.0128
X	20685068	20685947	8.34	7.93	8.66	-0.73	0.00886	0.0167
3R	16754358	16756061	8.22	7.81	8.54	-0.73	0.0105	0.0196
X	9098457	9098957	8.26	7.84	8.58	-0.73	0.011	0.0204
2L	6185061	6185438	7.56	7.15	7.88	-0.73	0.0127	0.0232
2R	6711516	6712023	9.88	9.48	10.2	-0.73	0.0149	0.0267
3L	16473867	16474479	8.08	7.66	8.4	-0.73	0.0195	0.034
3R	25077192	25077804	8.43	8.02	8.75	-0.73	0.0231	0.0397
X	7167475	7170575	13.7	13.29	14.03	-0.74	0.000575	0.0014
2R	21035152	21037390	11	10.59	11.33	-0.74	0.00109	0.00251
2L	4347357	4349542	11.62	11.21	11.95	-0.74	0.00303	0.00635
X	6612069	6612602	7.32	6.9	7.64	-0.74	0.00795	0.0152
3L	7530401	7530929	7.68	7.27	8.01	-0.74	0.0201	0.035
3R	17081115	17081614	8.43	8.02	8.75	-0.74	0.0206	0.0359
2R	14488089	14488880	11.8	11.37	12.12	-0.75	0.000701	0.00168
2L	18915445	18916900	9.53	9.1	9.86	-0.75	0.00214	0.00464
2L	4377376	4378858	10.93	10.51	11.26	-0.75	0.00302	0.00635
3L	10906326	10907177	9.24	8.82	9.57	-0.75	0.00583	0.0115
3L	3661675	3662807	8.82	8.39	9.15	-0.75	0.00604	0.0119
3R	18107994	18108356	8.37	7.95	8.7	-0.75	0.00642	0.0126
3R	20951290	20952106	9.71	9.29	10.04	-0.75	0.0131	0.0238
3R	17585665	17586755	8.74	8.31	9.07	-0.75	0.0194	0.0338
2L	520877	522119	11.54	11.11	11.87	-0.76	0.000769	0.00182
3R	22887259	22892330	13.09	12.66	13.42	-0.76	0.000934	0.00218
3R	27195068	27198606	11.67	11.24	12	-0.76	0.00116	0.00265
3R	5081613	5082071	8.48	8.05	8.81	-0.76	0.00217	0.0047
3L	19167157	19168306	11.11	10.69	11.44	-0.76	0.0028	0.00591
3R	16521432	16522548	8.39	7.96	8.72	-0.76	0.00301	0.00632
X	5047190	5048223	8.74	8.31	9.07	-0.76	0.00339	0.00702
2L	3539244	3539646	8.39	7.96	8.72	-0.76	0.0048	0.00963
2R	21530137	21530687	8.01	7.58	8.34	-0.76	0.00784	0.015
3L	21037381	21037688	7.83	7.4	8.16	-0.76	0.0126	0.0229
X	9075279	9075585	7.03	6.61	7.36	-0.76	0.0229	0.0393
2L	5408200	5410929	9.54	9.11	9.87	-0.76	0.0247	0.0421
3R	14744428	14745040	10.46	10.02	10.79	-0.77	0.000438	0.00109
3L	13647826	13649526	9.96	9.52	10.29	-0.77	0.00111	0.00255
3L	18400743	18401419	9.37	8.93	9.7	-0.77	0.00133	0.00301
3L	615633	616779	10.48	10.04	10.81	-0.77	0.00264	0.00561
3L	781825	782909	11.4	10.97	11.74	-0.77	0.00267	0.00567
3L	900881	902163	9.98	9.55	10.32	-0.77	0.00329	0.00684
2R	25019293	25019593	8.1	7.66	8.43	-0.77	0.00379	0.00778
3R	31978819	31979132	7.95	7.51	8.28	-0.77	0.00383	0.00784
X	3158079	3159876	8.29	7.86	8.62	-0.77	0.00483	0.00969
3L	18411366	18412377	9.43	9	9.76	-0.77	0.00731	0.0141
3R	14494693	14495607	8.24	7.81	8.58	-0.77	0.0134	0.0241
X	4709502	4709862	7.67	7.24	8.01	-0.77	0.0138	0.0248
4	500705	502967	14.89	14.45	15.23	-0.78	3.05e-05	9.38e-05
3L	17990809	17994517	12.66	12.22	13	-0.78	0.000559	0.00136
X	13230206	13231556	9.19	8.75	9.53	-0.78	0.0011	0.00253
3R	22165906	22166286	9.32	8.88	9.66	-0.78	0.00195	0.00426
2L	5505165	5506019	11.5	11.06	11.84	-0.78	0.0022	0.00476
3R	5091402	5091939	10.76	10.32	11.1	-0.78	0.00364	0.00749
2R	21028114	21029126	9.02	8.57	9.36	-0.78	0.00375	0.0077
3R	14458131	14458505	8.65	8.21	8.99	-0.78	0.00387	0.00792
2L	10689354	10689947	8.3	7.86	8.64	-0.78	0.00908	0.0171
3R	10444776	10445599	7.81	7.37	8.15	-0.78	0.00945	0.0177
2R	6932631	6933064	8.59	8.15	8.93	-0.78	0.0115	0.0212
X	6734462	6735570	8.23	7.8	8.57	-0.78	0.012	0.022
3L	22983463	22984778	6.97	6.52	7.3	-0.78	0.0134	0.0242
X	17697982	17698424	8.74	8.3	9.08	-0.78	0.0176	0.031
2L	4222644	4222974	7.49	7.05	7.83	-0.78	0.0194	0.0339
3R	29285500	29288828	11.45	11	11.79	-0.79	0.00043	0.00107
3L	2862365	2865217	13.2	12.76	13.54	-0.79	0.000745	0.00177
3R	13799083	13799719	9.53	9.08	9.87	-0.79	0.00129	0.00293
3L	19014397	19016218	8.93	8.48	9.27	-0.79	0.00304	0.00636
X	10536652	10537582	8.49	8.04	8.83	-0.79	0.00397	0.0081
3R	31699205	31699718	7.33	6.88	7.67	-0.79	0.00424	0.0086
2R	8656378	8656954	8.58	8.13	8.92	-0.79	0.00502	0.01
2L	14238111	14239019	8.82	8.38	9.16	-0.79	0.01	0.0187
3L	5817031	5817359	7.67	7.22	8.01	-0.79	0.0124	0.0227
X	15694577	15696856	11.39	10.94	11.74	-0.8	0.000124	0.000343
3R	11778775	11781360	13.32	12.87	13.66	-0.8	0.000307	0.000786
2R	10277497	10279310	9.71	9.26	10.06	-0.8	0.00087	0.00204
3R	5114736	5115169	9.6	9.15	9.95	-0.8	0.0012	0.00274
3R	16748840	16751132	11.74	11.29	12.09	-0.8	0.00157	0.0035
3R	4974342	4976791	8.47	8.01	8.82	-0.8	0.00164	0.00365
2L	21869257	21869947	9.23	8.78	9.58	-0.8	0.00175	0.00387
2R	14776751	14778432	8.7	8.24	9.04	-0.8	0.00216	0.00468
2L	15331593	15332285	8.16	7.7	8.5	-0.8	0.00286	0.00604
2L	11295415	11297885	11.06	10.61	11.41	-0.8	0.0063	0.0124
X	7535642	7536713	8.21	7.76	8.56	-0.8	0.00655	0.0128
3R	14459525	14459942	8.32	7.86	8.66	-0.8	0.00686	0.0133
3L	21054003	21055288	8.05	7.59	8.39	-0.8	0.00781	0.015
3L	2144371	2144671	7.85	7.39	8.2	-0.8	0.00843	0.016
3L	22160886	22162403	10.57	10.11	10.91	-0.8	0.00867	0.0164
2L	8790868	8791486	7.3	6.84	7.65	-0.8	0.0106	0.0197
3R	28629910	28630279	8.11	7.66	8.46	-0.8	0.0245	0.0419
X	4020312	4020992	7.73	7.27	8.08	-0.8	0.0281	0.0474
3L	1936776	1937498	9	8.54	9.35	-0.81	0.000996	0.00231
X	2983034	2987377	10.7	10.23	11.05	-0.81	0.00104	0.0024
X	17298186	17298965	8.54	8.08	8.89	-0.81	0.0017	0.00378
2L	6087401	6087765	8.86	8.4	9.21	-0.81	0.00237	0.00511
2L	15323440	15324292	10.37	9.91	10.72	-0.81	0.0029	0.00611
3L	8446737	8448687	8.12	7.66	8.47	-0.81	0.00421	0.00853
2L	1425882	1426986	8.76	8.29	9.1	-0.81	0.00453	0.00915
2L	21629769	21632058	9.05	8.59	9.4	-0.81	0.00495	0.00992
2R	24838355	24838741	7.41	6.95	7.75	-0.81	0.00669	0.013
2L	15491278	15491756	9.23	8.77	9.58	-0.81	0.00741	0.0142
3L	3874205	3874975	8.38	7.92	8.73	-0.81	0.0117	0.0215
3L	6922941	6924936	11.36	10.9	11.71	-0.81	0.0128	0.0233
X	305360	305754	7.25	6.79	7.6	-0.81	0.0143	0.0257
2L	19316346	19317056	7.3	6.84	7.65	-0.81	0.021	0.0363
X	2322730	2323105	6.59	6.13	6.94	-0.81	0.022	0.038
3L	18282757	18283386	7.09	6.62	7.44	-0.81	0.0239	0.041
3R	21633199	21639122	13.29	12.82	13.64	-0.82	5.36e-05	0.000158
3L	14163135	14166616	14.53	14.06	14.88	-0.82	0.000138	0.000377
2L	7277884	7280090	9.4	8.93	9.75	-0.82	0.000307	0.000786
2L	12677550	12684218	14.57	14.1	14.92	-0.82	0.000315	0.000805
3L	15197535	15199641	9.08	8.61	9.43	-0.82	0.000636	0.00153
3L	296889	297712	12.01	11.54	12.36	-0.82	0.0022	0.00477
3L	5630417	5631050	7.91	7.44	8.26	-0.82	0.00342	0.00707
2L	21887957	21888694	7.62	7.15	7.97	-0.82	0.00551	0.0109
2L	4037402	4039310	10.48	10.01	10.83	-0.82	0.0114	0.021
3L	11001522	11002514	8.24	7.77	8.59	-0.82	0.0126	0.023
3R	22595409	22595850	7.07	6.6	7.42	-0.82	0.0127	0.0232
3R	18294405	18294731	7.95	7.48	8.3	-0.82	0.0189	0.0331
X	18515598	18515945	9.48	9.01	9.83	-0.82	0.0249	0.0424
3L	11004520	11004833	6.99	6.52	7.34	-0.82	0.0291	0.049
2R	12741949	12743859	12.94	12.47	13.3	-0.83	0.000226	0.000596
3L	752825	753409	9.72	9.25	10.08	-0.83	0.000478	0.00118
3L	13408514	13409847	8.94	8.47	9.3	-0.83	0.000573	0.00139
3R	8211032	8211847	7.82	7.35	8.18	-0.83	0.00158	0.00353
2R	15836566	15837810	9.52	9.04	9.87	-0.83	0.00242	0.0052
X	8646688	8648547	9.98	9.51	10.34	-0.83	0.00273	0.00578
2L	14461524	14464782	10.74	10.26	11.09	-0.83	0.00479	0.00963
3L	15951783	15952582	7.98	7.51	8.34	-0.83	0.00561	0.0111
3R	22560937	22561635	6.97	6.5	7.33	-0.83	0.0078	0.0149
3R	29776136	29777051	7.02	6.55	7.37	-0.83	0.00943	0.0177
3L	22270500	22270837	6.9	6.43	7.26	-0.83	0.0254	0.0433
3L	22488816	22490284	7.92	7.44	8.27	-0.83	0.028	0.0473
2L	19217625	19220183	11.23	10.75	11.58	-0.84	0.000253	0.00066
X	9131902	9133670	11.82	11.34	12.18	-0.84	0.000319	0.000815
3L	22118731	22119691	9.56	9.08	9.92	-0.84	0.000644	0.00155
2R	14984445	14984768	9.69	9.21	10.06	-0.84	0.00073	0.00174
3R	12252691	12253728	9.08	8.6	9.45	-0.84	0.00167	0.00371
2R	9413869	9414488	7.72	7.24	8.07	-0.84	0.00192	0.00421
2L	18498467	18499079	8.37	7.89	8.73	-0.84	0.00225	0.00487
2L	14513946	14514246	7.59	7.11	7.95	-0.84	0.00434	0.00879
X	4987258	4988650	7.66	7.18	8.02	-0.84	0.00654	0.0128
X	4192567	4192928	8.11	7.63	8.47	-0.84	0.00677	0.0131
2L	21825408	21826073	8.28	7.8	8.64	-0.84	0.00742	0.0143
3L	15280312	15280867	7.09	6.61	7.46	-0.84	0.0196	0.0341
3L	6919431	6919731	6.64	6.16	6.99	-0.84	0.0196	0.0342
3L	1675708	1676364	6.63	6.15	6.99	-0.84	0.0275	0.0464
3L	16766810	16769205	10.38	9.9	10.75	-0.85	8.3e-05	0.000237
X	17779686	17781421	9.45	8.96	9.81	-0.85	0.0004	0.000999
X	6998553	6998880	9.41	8.92	9.77	-0.85	0.000662	0.00159
3L	17895420	17896183	9.54	9.06	9.91	-0.85	0.000733	0.00175
2R	6569298	6570775	10.11	9.62	10.47	-0.85	0.000822	0.00193
3R	15418813	15420026	11.4	10.91	11.76	-0.85	0.000859	0.00202
3L	803984	806299	9.73	9.24	10.09	-0.85	0.0011	0.00253
3L	9507905	9509184	10.44	9.96	10.8	-0.85	0.00164	0.00365
3L	790902	793204	10.87	10.39	11.24	-0.85	0.00175	0.00386
3R	30091666	30091979	7.34	6.85	7.7	-0.85	0.00244	0.00523
3R	23789602	23791369	10.34	9.85	10.71	-0.85	0.00311	0.0065
2L	6535784	6537058	9.98	9.49	10.34	-0.85	0.0123	0.0224
X	1106097	1106519	7.4	6.91	7.77	-0.85	0.0131	0.0237
X	9686288	9686890	8.42	7.93	8.78	-0.85	0.0131	0.0237
3R	16821264	16821689	6.74	6.26	7.1	-0.85	0.015	0.0269
2L	8817453	8819046	9.5	9	9.87	-0.86	0.000409	0.00102
X	10110640	10112423	9.83	9.34	10.2	-0.86	0.000671	0.00161
3R	9342016	9342316	8.19	7.7	8.56	-0.86	0.000785	0.00186
2L	1736252	1737466	8.91	8.42	9.28	-0.86	0.000998	0.00232
2L	15384451	15385569	8.21	7.72	8.58	-0.86	0.00127	0.0029
2L	11352430	11353024	10.77	10.27	11.14	-0.86	0.00153	0.00342
2R	11383948	11385016	8.01	7.52	8.38	-0.86	0.00154	0.00345
2L	15428954	15429675	8.08	7.58	8.44	-0.86	0.0021	0.00456
3L	536810	537350	8.19	7.7	8.56	-0.86	0.00324	0.00674
2R	15249692	15250849	9.49	9	9.86	-0.86	0.00343	0.0071
3L	7529437	7530165	8.12	7.63	8.48	-0.86	0.00357	0.00736
2L	16754394	16755446	8.26	7.77	8.63	-0.86	0.00491	0.00984
2L	2392579	2393512	7.3	6.81	7.67	-0.86	0.00562	0.0111
2R	13617230	13617919	7.47	6.98	7.84	-0.86	0.00621	0.0122
3R	16837716	16838212	7.49	7	7.86	-0.86	0.00699	0.0135
2R	13011239	13012354	8.64	8.15	9.01	-0.86	0.00979	0.0183
3L	2567735	2568208	7.05	6.55	7.41	-0.86	0.0168	0.0297
3L	11342232	11345086	12.26	11.76	12.63	-0.87	7.04e-05	0.000204
X	7611352	7614364	11.01	10.52	11.38	-0.87	0.00017	0.000457
3R	26034212	26037174	9.92	9.43	10.29	-0.87	0.000177	0.000475
X	18516398	18517134	9.13	8.63	9.5	-0.87	0.000338	0.00086
2L	14485098	14488007	13.33	12.82	13.7	-0.87	0.000403	0.00101
2L	19102853	19103499	10.17	9.67	10.54	-0.87	0.000435	0.00108
2R	14800661	14803317	10.13	9.64	10.5	-0.87	0.000682	0.00163
3L	13646698	13647650	10.74	10.24	11.11	-0.87	0.000908	0.00212
3L	3881398	3883413	11.36	10.87	11.73	-0.87	0.00108	0.0025
2L	1738724	1740149	9.51	9.02	9.88	-0.87	0.00114	0.00261
3L	21649006	21649789	8.67	8.18	9.05	-0.87	0.00121	0.00276
3R	27200749	27202008	8.15	7.65	8.52	-0.87	0.00313	0.00655
X	17578220	17578520	8.29	7.79	8.66	-0.87	0.00357	0.00736
3R	10555464	10559594	12.41	11.91	12.78	-0.87	0.00391	0.008
2L	14531101	14531714	7.93	7.42	8.3	-0.87	0.00463	0.00933
2R	24746372	24746971	8.7	8.2	9.07	-0.87	0.00556	0.011
X	1967738	1968099	7.18	6.68	7.55	-0.87	0.00597	0.0118
X	4547125	4547542	7.08	6.58	7.45	-0.87	0.00696	0.0135
2R	8093536	8094172	7.33	6.83	7.7	-0.87	0.00896	0.0169
3R	6730264	6730636	7.84	7.34	8.21	-0.87	0.0108	0.02
3L	12836499	12836900	7.59	7.09	7.96	-0.87	0.0133	0.024
X	15383781	15385275	9.55	9.05	9.93	-0.88	6.2e-05	0.000181
X	5768726	5770618	9.71	9.2	10.08	-0.88	6.28e-05	0.000183
2L	1446297	1446950	9.29	8.79	9.67	-0.88	0.000112	0.000311
3R	16772211	16774979	12.95	12.45	13.32	-0.88	0.000551	0.00134
2L	14433185	14436355	11.2	10.7	11.57	-0.88	0.00136	0.00307
3L	14283853	14284197	7.45	6.94	7.82	-0.88	0.00182	0.004
X	18100163	18100588	8.27	7.77	8.65	-0.88	0.00385	0.00789
2R	17474528	17475301	9.19	8.68	9.56	-0.88	0.00392	0.008
2L	2450086	2450386	7.55	7.04	7.92	-0.88	0.00397	0.0081
X	1908002	1909128	8.34	7.83	8.71	-0.88	0.00402	0.00819
2R	21038116	21038632	9.38	8.87	9.75	-0.88	0.00459	0.00926
2R	9875154	9875660	7.58	7.08	7.95	-0.88	0.00497	0.00995
3R	9926577	9927027	7.68	7.18	8.05	-0.88	0.00655	0.0128
3R	15640309	15641369	8.29	7.78	8.66	-0.88	0.0166	0.0294
3L	14327188	14327567	7.56	7.05	7.93	-0.88	0.0267	0.0453
2R	23663663	23663979	6.62	6.12	7	-0.88	0.0284	0.0479
3R	8925633	8929838	13.28	12.77	13.65	-0.89	3.06e-05	9.41e-05
2R	6574763	6579904	10.99	10.48	11.37	-0.89	0.000114	0.000318
2R	18292468	18293438	10.9	10.38	11.28	-0.89	0.000154	0.000419
3R	8700583	8703017	9.64	9.12	10.02	-0.89	0.000321	0.000818
2L	7276962	7277379	8.88	8.37	9.26	-0.89	0.00049	0.00121
3L	10303713	10306001	7.98	7.47	8.36	-0.89	0.00119	0.00273
3L	15221861	15223745	10.02	9.51	10.4	-0.89	0.00138	0.00312
3R	29818892	29820062	7.11	6.6	7.49	-0.89	0.00271	0.00575
3R	30060652	30061062	8.55	8.03	8.93	-0.89	0.00327	0.00681
3R	19925145	19925656	7.88	7.36	8.25	-0.89	0.00575	0.0114
3L	20730227	20730578	8.48	7.97	8.85	-0.89	0.00649	0.0127
2L	13886120	13886620	7.15	6.64	7.53	-0.89	0.00697	0.0135
2L	7189165	7189623	7.14	6.62	7.52	-0.89	0.012	0.0219
3L	913691	914080	7.23	6.71	7.6	-0.89	0.0152	0.0273
2L	17766565	17767175	6.57	6.05	6.95	-0.89	0.0164	0.0292
2L	7589427	7594192	13.88	13.36	14.26	-0.9	1.44e-05	4.69e-05
2R	9708351	9709450	13.42	12.9	13.8	-0.9	5.11e-05	0.000151
3L	906613	909220	11.48	10.96	11.86	-0.9	5.61e-05	0.000165
3L	12081859	12082181	9.43	8.91	9.81	-0.9	8.67e-05	0.000247
3R	13870060	13871620	11.95	11.43	12.33	-0.9	0.000129	0.000355
X	9666257	9667354	10.64	10.12	11.02	-0.9	0.000157	0.000426
3L	22590731	22591418	8.67	8.15	9.05	-0.9	0.000216	0.000572
3R	30224008	30227427	10.55	10.03	10.93	-0.9	0.000375	0.000941
2R	16822189	16823617	9.34	8.82	9.73	-0.9	0.000616	0.00149
2L	1462068	1463685	11.42	10.9	11.8	-0.9	0.000759	0.0018
3R	16846189	16849488	10.35	9.84	10.73	-0.9	0.000837	0.00197
3L	16017676	16019314	7.79	7.28	8.17	-0.9	0.000841	0.00198
3L	380831	381612	9.13	8.61	9.51	-0.9	0.0011	0.00253
3R	5730330	5732366	9.06	8.55	9.44	-0.9	0.00186	0.00409
2L	7002906	7003951	7.47	6.95	7.85	-0.9	0.00223	0.00483
4	972776	976997	11.31	10.79	11.69	-0.9	0.0027	0.00573
3R	19349426	19353145	11.45	10.93	11.83	-0.9	0.00301	0.00631
3R	5074220	5074617	7.61	7.1	8	-0.9	0.00476	0.00957
3R	32013910	32014522	7.46	6.94	7.84	-0.9	0.0049	0.00982
2L	15415911	15417325	7.61	7.09	7.99	-0.9	0.0109	0.0202
3L	17374470	17374921	7.31	6.79	7.69	-0.9	0.0112	0.0207
2R	11959207	11959972	6.59	6.08	6.97	-0.9	0.0123	0.0225
X	19322890	19323387	8.3	7.78	8.68	-0.9	0.0123	0.0225
2L	12054632	12055122	6.23	5.71	6.61	-0.9	0.0209	0.0362
X	4437968	4441535	10.07	9.54	10.45	-0.91	0.000126	0.000348
3R	16628171	16629013	11.1	10.58	11.49	-0.91	0.000137	0.000374
2R	12664136	12665006	9.71	9.18	10.09	-0.91	0.000141	0.000385
3R	24268430	24269489	10.1	9.58	10.49	-0.91	0.000221	0.000583
2L	12686246	12689942	9.73	9.21	10.12	-0.91	0.00092	0.00215
3L	8652577	8654861	9.86	9.34	10.25	-0.91	0.00111	0.00255
X	7716316	7718892	10.56	10.03	10.94	-0.91	0.00158	0.00353
3R	30276030	30277679	7.97	7.44	8.35	-0.91	0.00281	0.00593
3L	13251003	13251303	7.1	6.58	7.48	-0.91	0.00325	0.00676
3L	5663585	5664204	9.88	9.35	10.26	-0.91	0.00343	0.0071
2L	1427136	1427515	8.13	7.61	8.52	-0.91	0.00722	0.0139
2R	14835195	14836365	6.87	6.34	7.25	-0.91	0.00912	0.0172
2L	5414007	5414587	8.62	8.09	9	-0.91	0.0102	0.019
3L	16916087	16916387	7.2	6.68	7.59	-0.91	0.0161	0.0286
2L	612819	613671	6.85	6.32	7.23	-0.91	0.0161	0.0287
X	15078540	15078857	6.37	5.84	6.75	-0.91	0.0259	0.044
2R	13543843	13544171	6.75	6.23	7.14	-0.91	0.0262	0.0444
3L	16481058	16482384	10.38	9.85	10.77	-0.92	0.00012	0.000333
2L	11433264	11434587	8.93	8.4	9.32	-0.92	0.000256	0.000666
2L	8843478	8845285	10.86	10.33	11.25	-0.92	0.000484	0.00119
X	8106537	8107402	8.22	7.69	8.61	-0.92	0.000506	0.00124
3L	12456511	12459981	11.58	11.05	11.97	-0.92	0.000844	0.00198
3R	16533311	16533860	7.8	7.27	8.19	-0.92	0.00134	0.00304
3R	16525028	16525419	7.12	6.6	7.51	-0.92	0.00251	0.00536
2L	7293773	7295120	8.02	7.49	8.41	-0.92	0.00381	0.00781
X	3141706	3143411	8.66	8.12	9.05	-0.92	0.00412	0.00837
3R	5508085	5508640	7.5	6.97	7.89	-0.92	0.00668	0.013
2L	1234073	1234896	7.49	6.96	7.88	-0.92	0.00785	0.015
2R	13417081	13417756	6.73	6.2	7.12	-0.92	0.0152	0.0273
3L	3655221	3656015	6.47	5.94	6.86	-0.92	0.0167	0.0295
3L	13150624	13151036	7.48	6.95	7.87	-0.92	0.0177	0.0312
3R	12319796	12320738	6.97	6.44	7.36	-0.92	0.0185	0.0324
2R	22155148	22155462	6.66	6.13	7.05	-0.92	0.0269	0.0455
2R	10533791	10537693	13.73	13.19	14.12	-0.93	8.66e-06	2.92e-05
X	17512388	17513177	10.07	9.53	10.47	-0.93	2.07e-05	6.55e-05
X	15365286	15365967	11.4	10.86	11.79	-0.93	0.000177	0.000474
3L	15227213	15228186	9.3	8.77	9.69	-0.93	0.000207	0.000549
3L	4226269	4226995	10.13	9.59	10.52	-0.93	0.000215	0.00057
2R	21494759	21495123	7.75	7.21	8.14	-0.93	0.000573	0.00139
2R	17759469	17760178	8.26	7.73	8.66	-0.93	0.000616	0.00149
2L	9720726	9722062	8.02	7.48	8.41	-0.93	0.00107	0.00247
2L	5245647	5246038	7.55	7.01	7.94	-0.93	0.00108	0.00249
X	8212600	8214377	9.09	8.55	9.48	-0.93	0.00114	0.00262
2L	7136613	7137620	8.55	8.01	8.94	-0.93	0.00175	0.00387
2L	9155988	9157389	7.59	7.05	7.98	-0.93	0.00185	0.00406
2L	1251662	1252519	6.83	6.29	7.22	-0.93	0.0187	0.0327
2L	20783327	20783687	6.08	5.54	6.47	-0.93	0.024	0.041
3L	10844490	10848024	13.63	13.09	14.02	-0.94	9.74e-06	3.25e-05
2L	14427971	14431869	10.82	10.27	11.21	-0.94	0.000108	0.000303
2R	15899541	15900715	9.14	8.6	9.54	-0.94	0.000162	0.000437
3R	19075726	19076977	9.94	9.4	10.33	-0.94	0.000301	0.000774
3R	27220425	27222352	8.95	8.41	9.34	-0.94	0.000657	0.00158
3R	13814811	13815375	8.7	8.15	9.1	-0.94	0.000914	0.00213
3L	19171860	19172284	8.49	7.94	8.88	-0.94	0.00202	0.00439
3R	27856008	27856348	7.49	6.94	7.89	-0.94	0.00235	0.00505
2R	9684679	9685153	8.18	7.64	8.58	-0.94	0.00362	0.00746
2L	19866693	19867305	7.14	6.59	7.53	-0.94	0.00426	0.00864
X	4989315	4989678	7.64	7.09	8.03	-0.94	0.0147	0.0264
3R	29253924	29254224	6.71	6.17	7.11	-0.94	0.0159	0.0284
3R	4861081	4861441	6.83	6.29	7.23	-0.94	0.0218	0.0376
2R	10077419	10078476	12.69	12.14	13.09	-0.95	9.01e-06	3.03e-05
3R	4353032	4353932	10.88	10.33	11.27	-0.95	8.08e-05	0.000232
X	23023171	23025203	10.37	9.82	10.77	-0.95	0.000135	0.000369
3L	22145204	22148704	11.14	10.59	11.54	-0.95	0.000166	0.000447
2L	16463163	16463980	8.96	8.41	9.35	-0.95	0.000363	0.000916
3R	4828518	4829818	10.85	10.3	11.25	-0.95	0.0004	0.001
3L	14544125	14545140	10.94	10.38	11.34	-0.95	0.000481	0.00119
2L	502033	503656	9.57	9.02	9.97	-0.95	0.000747	0.00177
3L	11323560	11324129	7.86	7.31	8.26	-0.95	0.00366	0.00752
2L	14846867	14847444	7.05	6.49	7.45	-0.95	0.00464	0.00936
3L	15089945	15090559	7.47	6.93	7.87	-0.95	0.00678	0.0132
3R	17061568	17062155	6.5	5.95	6.9	-0.95	0.012	0.022
X	3046004	3046433	7.16	6.61	7.56	-0.95	0.0155	0.0277
3R	12361627	12362113	6.25	5.7	6.65	-0.95	0.0159	0.0283
2R	17077435	17077735	6.27	5.72	6.67	-0.95	0.0246	0.0421
3R	18821468	18822046	6.45	5.9	6.85	-0.95	0.0266	0.0451
3R	30758953	30764264	14.02	13.46	14.42	-0.96	2.88e-06	1.06e-05
3L	621922	622762	10.01	9.45	10.41	-0.96	1.47e-05	4.78e-05
X	16942758	16945255	9.76	9.2	10.16	-0.96	8.78e-05	0.00025
3R	29081001	29081848	8.28	7.72	8.68	-0.96	9.19e-05	0.000261
2L	21789062	21789446	9.06	8.51	9.47	-0.96	0.000188	0.000502
3R	14587212	14587821	8.11	7.55	8.51	-0.96	0.00039	0.000977
3L	22266346	22267739	8.34	7.78	8.74	-0.96	0.0012	0.00274
3R	23436593	23437548	7.48	6.92	7.88	-0.96	0.00174	0.00385
3R	6100184	6101224	6.97	6.41	7.37	-0.96	0.00195	0.00425
2R	14950819	14951120	7.46	6.91	7.86	-0.96	0.00217	0.0047
X	3813996	3814666	6.85	6.3	7.25	-0.96	0.00346	0.00715
2L	14566012	14567008	7.62	7.06	8.02	-0.96	0.00441	0.00892
3R	30849906	30850922	6.84	6.28	7.24	-0.96	0.0109	0.0201
2L	21931988	21932600	6.58	6.02	6.98	-0.96	0.013	0.0236
3L	20706469	20707573	6.9	6.34	7.3	-0.96	0.0211	0.0365
3L	11123554	11123870	6.53	5.97	6.93	-0.96	0.0253	0.0431
3L	6804874	6805265	6.52	5.96	6.92	-0.96	0.0259	0.044
2L	17583797	17590492	14.75	14.18	15.15	-0.97	8.78e-06	2.96e-05
3R	21091614	21092016	9.4	8.84	9.81	-0.97	4.31e-05	0.000129
3L	11925892	11926771	10.05	9.49	10.45	-0.97	0.000289	0.000744
2R	23049710	23050816	10.41	9.84	10.81	-0.97	0.000338	0.000859
2R	19882006	19882730	7.35	6.79	7.76	-0.97	0.000976	0.00227
3L	19637433	19637899	7.98	7.41	8.39	-0.97	0.00127	0.00289
2L	19193960	19196113	9.38	8.82	9.79	-0.97	0.00152	0.0034
2L	1422701	1423313	7.6	7.03	8	-0.97	0.00242	0.0052
2R	19934063	19934856	6.81	6.24	7.21	-0.97	0.00317	0.00661
3L	12665227	12665814	6.89	6.32	7.3	-0.97	0.00605	0.0119
3L	10294350	10294662	7.85	7.28	8.25	-0.97	0.00726	0.014
2R	5717611	5718532	7.39	6.83	7.8	-0.97	0.00956	0.0179
3L	27894239	27895087	6.64	6.07	7.05	-0.97	0.0126	0.023
3R	31722251	31726515	12.76	12.19	13.17	-0.98	5.16e-07	2.14e-06
2L	14578101	14579788	10.55	9.98	10.96	-0.98	3.9e-05	0.000118
3L	21199694	21200109	8.82	8.25	9.23	-0.98	0.000103	0.000288
3R	9028140	9028713	10.32	9.74	10.73	-0.98	0.000411	0.00102
3L	7864933	7865265	8.25	7.68	8.66	-0.98	0.000432	0.00107
2L	4364833	4367365	11.03	10.45	11.44	-0.98	0.000509	0.00125
X	10602846	10603297	7.78	7.21	8.19	-0.98	0.000659	0.00158
2R	20956605	20959899	11.12	10.54	11.53	-0.98	0.000709	0.00169
2R	7431029	7431991	7.97	7.4	8.38	-0.98	0.0022	0.00476
X	3143610	3143945	7.15	6.58	7.55	-0.98	0.00227	0.0049
2R	16008860	16009630	7.99	7.41	8.4	-0.98	0.00233	0.00502
3R	9151384	9151739	7.68	7.11	8.09	-0.98	0.00282	0.00594
3L	8528481	8529472	7.34	6.77	7.75	-0.98	0.00513	0.0102
2R	11523062	11523582	6.83	6.26	7.24	-0.98	0.00627	0.0123
2R	22305836	22306536	6.42	5.85	6.83	-0.98	0.015	0.0269
2L	8905887	8906252	5.91	5.34	6.31	-0.98	0.0246	0.0421
2L	2362618	2366460	11	10.42	11.41	-0.99	6.06e-06	2.11e-05
2R	10550955	10552289	13.71	13.13	14.12	-0.99	6.3e-06	2.18e-05
2L	5246967	5249150	10.47	9.9	10.88	-0.99	1.87e-05	5.98e-05
3R	29216548	29216900	9.48	8.9	9.89	-0.99	5.85e-05	0.000172
3R	16966406	16968713	9.47	8.89	9.89	-0.99	0.000334	0.000851
3R	30197828	30198423	7.92	7.35	8.33	-0.99	0.000427	0.00106
3L	6239861	6240404	8.7	8.12	9.12	-0.99	0.000579	0.0014
3R	21614241	21614975	8.71	8.13	9.12	-0.99	0.000663	0.00159
3L	6847595	6848651	9.51	8.93	9.92	-0.99	0.000707	0.00169
2R	15350187	15353601	14.24	13.66	14.65	-1	1.17e-05	3.87e-05
X	7319155	7320853	8.45	7.86	8.86	-1	0.000109	0.000303
3R	16448108	16449305	8.12	7.53	8.53	-1	0.000287	0.00074
2R	12554529	12555352	7.61	7.03	8.03	-1	0.000451	0.00112
X	17519097	17520251	8.5	7.92	8.92	-1	0.0023	0.00495
X	20085707	20086947	7.61	7.02	8.03	-1	0.00344	0.0071
2R	8234476	8237531	12.33	11.74	12.75	-1.01	6.11e-06	2.12e-05
X	690576	694187	12.62	12.03	13.03	-1.01	1.43e-05	4.67e-05
3L	19658426	19658794	8.3	7.71	8.72	-1.01	4.86e-05	0.000145
X	17377271	17380382	11.28	10.69	11.7	-1.01	5.87e-05	0.000172
3R	16762527	16764239	8.58	7.99	9	-1.01	0.000209	0.000555
2R	21496180	21496530	7.67	7.08	8.09	-1.01	0.00149	0.00336
X	7255347	7255988	6.72	6.13	7.14	-1.01	0.00542	0.0108
3L	774979	775461	7.03	6.44	7.45	-1.01	0.00616	0.0121
2L	11450037	11451301	8.68	8.08	9.09	-1.01	0.017	0.0301
3L	14154801	14155365	7.14	6.55	7.56	-1.01	0.0257	0.0436
2R	23585196	23586506	11.82	11.22	12.24	-1.02	1.07e-06	4.24e-06
3L	742491	743735	12.11	11.51	12.53	-1.02	1.01e-05	3.37e-05
3R	30233518	30235938	9.75	9.15	10.17	-1.02	0.000219	0.000578
X	7314129	7314862	7.91	7.31	8.33	-1.02	0.000224	0.000591
3L	2158681	2160351	9.5	8.9	9.92	-1.02	0.000458	0.00113
2R	22151903	22152515	7.11	6.51	7.53	-1.02	0.000632	0.00152
2L	2758263	2758796	10.04	9.44	10.47	-1.02	0.000885	0.00207
2L	16497032	16497663	7.23	6.63	7.65	-1.02	0.0041	0.00835
3L	22585771	22588582	14.88	14.28	15.3	-1.03	1.73e-07	7.67e-07
3L	5621454	5625543	13.29	12.69	13.71	-1.03	3.47e-06	1.26e-05
3R	8740646	8740969	9.15	8.54	9.58	-1.03	1.59e-05	5.12e-05
4	81940	83559	11.57	10.96	11.99	-1.03	2.39e-05	7.47e-05
3L	16091375	16091714	7.56	6.96	7.99	-1.03	0.000281	0.000727
3L	646769	647278	8.72	8.12	9.15	-1.03	0.000353	0.000895
3R	16745035	16745531	8.46	7.86	8.89	-1.03	0.00157	0.0035
2L	20354434	20355320	8.36	7.76	8.79	-1.03	0.00168	0.00373
2R	23871790	23872179	8.74	8.13	9.16	-1.03	0.00232	0.00501
2L	15333965	15334294	6.87	6.26	7.3	-1.03	0.00254	0.00541
3L	20700538	20701623	7.44	6.83	7.86	-1.03	0.00281	0.00593
3L	14946095	14946744	6.76	6.15	7.18	-1.03	0.00307	0.00643
3R	4672419	4672719	7.12	6.52	7.54	-1.03	0.00332	0.00689
3L	14146023	14146767	6.75	6.15	7.18	-1.03	0.00518	0.0103
X	1613012	1613507	6.52	5.92	6.94	-1.03	0.0149	0.0267
3L	10785598	10785987	6.56	5.95	6.98	-1.03	0.0156	0.0279
2R	19254162	19259625	12.69	12.08	13.12	-1.04	1.86e-06	7.04e-06
2L	14673005	14674888	9.06	8.45	9.49	-1.04	6.86e-06	2.36e-05
X	15681461	15683230	9.19	8.58	9.62	-1.04	8.27e-06	2.8e-05
3R	24893154	24893781	10.7	10.09	11.13	-1.04	1.74e-05	5.57e-05
3R	13996640	13998034	11.47	10.86	11.9	-1.04	2.13e-05	6.74e-05
3L	3972497	3974296	9.71	9.1	10.14	-1.04	5.88e-05	0.000172
3L	6825643	6826637	11.08	10.46	11.5	-1.04	6.08e-05	0.000178
2R	15861597	15861898	10.11	9.5	10.54	-1.04	8.24e-05	0.000236
2L	2166807	2167200	8.25	7.64	8.67	-1.04	0.000106	0.000297
2L	21843819	21844502	8.96	8.34	9.38	-1.04	0.000124	0.000342
2R	16277125	16277794	7.68	7.07	8.11	-1.04	0.000291	0.00075
3R	24271607	24272723	11.84	11.23	12.27	-1.04	0.000311	0.000796
3L	19306372	19308547	9.67	9.05	10.1	-1.04	0.000815	0.00192
3L	7390364	7391053	7.18	6.57	7.61	-1.04	0.000931	0.00217
3L	7010645	7011037	8.45	7.83	8.88	-1.04	0.0018	0.00397
2R	18346327	18346729	6.75	6.14	7.18	-1.04	0.00255	0.00543
X	9652355	9652748	7.01	6.4	7.44	-1.04	0.00281	0.00593
X	17727729	17728029	6.56	5.95	6.99	-1.04	0.0033	0.00684
3L	9718747	9719462	6.54	5.93	6.97	-1.04	0.0136	0.0245
3R	5684462	5685030	6.13	5.52	6.56	-1.04	0.0161	0.0286
2L	8748749	8752387	11.27	10.65	11.7	-1.05	4.6e-06	1.64e-05
3L	18016890	18017932	9.17	8.55	9.6	-1.05	1.47e-05	4.78e-05
3L	19043494	19043900	11.74	11.13	12.17	-1.05	2.02e-05	6.42e-05
2R	25210914	25214705	11.72	11.1	12.15	-1.05	2.23e-05	7.02e-05
X	2136052	2136413	9.12	8.5	9.55	-1.05	4.23e-05	0.000127
2R	17680390	17682180	10.33	9.72	10.76	-1.05	0.000143	0.000389
2L	1420653	1421817	9.24	8.62	9.68	-1.05	0.000258	0.000671
3L	21036564	21037266	9.55	8.93	9.98	-1.05	0.000512	0.00125
3L	13074411	13074806	7.54	6.92	7.97	-1.05	0.000648	0.00156
2L	4285961	4287159	8.44	7.82	8.87	-1.05	0.00148	0.00332
2L	20785097	20785915	6.74	6.13	7.17	-1.05	0.00204	0.00444
4	832963	833575	7.76	7.14	8.19	-1.05	0.00263	0.00559
2R	13926040	13926685	7.55	6.93	7.98	-1.05	0.00486	0.00975
2L	19772951	19773439	6.56	5.94	6.99	-1.05	0.00498	0.00996
3L	22943219	22943985	11.88	11.26	12.32	-1.06	7.52e-07	3.04e-06
3L	12150206	12151896	11.6	10.97	12.03	-1.06	1.82e-06	6.91e-06
2L	4371397	4371856	11.45	10.82	11.88	-1.06	1.5e-05	4.86e-05
3L	623018	623401	8.8	8.18	9.24	-1.06	5.67e-05	0.000167
X	4498471	4499209	7.87	7.25	8.31	-1.06	6.83e-05	0.000198
3R	16948106	16949502	8.18	7.55	8.61	-1.06	9.38e-05	0.000266
2L	5376452	5377804	9.53	8.91	9.97	-1.06	0.000256	0.000665
2L	19324546	19325317	7.98	7.35	8.41	-1.06	0.000521	0.00128
3L	21094495	21094795	7.09	6.46	7.52	-1.06	0.00256	0.00546
X	17505117	17505795	6.92	6.3	7.36	-1.06	0.00566	0.0112
2L	6210380	6217085	13.73	13.1	14.17	-1.07	3.41e-07	1.45e-06
3R	14011332	14012659	10.66	10.03	11.1	-1.07	1.31e-06	5.11e-06
2L	7542647	7546760	10.92	10.29	11.36	-1.07	8.28e-06	2.81e-05
3R	22526726	22528622	9.48	8.85	9.91	-1.07	1.31e-05	4.3e-05
2L	3417635	3419271	8.16	7.53	8.6	-1.07	1.97e-05	6.25e-05
3R	16690996	16693168	10.2	9.57	10.64	-1.07	9.9e-05	0.000279
X	1229120	1229980	8.09	7.46	8.52	-1.07	0.000102	0.000285
3L	15229594	15230093	8.16	7.53	8.6	-1.07	0.000226	0.000595
2R	22009822	22010246	7.99	7.35	8.43	-1.07	0.000316	0.000806
3L	608878	610070	8.16	7.53	8.59	-1.07	0.000684	0.00164
2R	25052145	25052679	7.36	6.72	7.8	-1.07	0.000825	0.00194
3L	20296755	20297407	8.61	7.97	9.05	-1.07	0.00106	0.00246
2R	18570692	18571150	7.47	6.84	7.91	-1.07	0.00131	0.00297
3L	5178398	5178850	7.87	7.24	8.31	-1.07	0.00236	0.00508
2R	19276671	19277038	6.73	6.1	7.17	-1.07	0.00242	0.0052
3R	14578381	14579489	7.78	7.15	8.22	-1.07	0.00244	0.00523
3L	15262095	15263510	7.7	7.07	8.14	-1.07	0.00419	0.0085
3L	18266160	18266951	7.66	7.02	8.1	-1.07	0.00567	0.0112
3L	5828155	5828745	6.1	5.46	6.54	-1.07	0.00598	0.0118
3L	10340073	10340609	6.38	5.75	6.82	-1.07	0.00911	0.0172
3L	18004445	18006250	11.4	10.75	11.84	-1.08	7.1e-07	2.88e-06
X	12653912	12654229	9.89	9.25	10.33	-1.08	1.3e-06	5.09e-06
X	7095504	7097492	10.17	9.53	10.61	-1.08	6.19e-06	2.15e-05
2R	11713952	11714444	9.84	9.2	10.28	-1.08	7.47e-06	2.55e-05
2L	19069927	19071278	9.12	8.49	9.56	-1.08	1.59e-05	5.12e-05
3L	132871	134432	8.68	8.04	9.12	-1.08	2.48e-05	7.72e-05
3R	18043580	18044542	10.13	9.5	10.57	-1.08	3.34e-05	0.000102
3R	10598891	10600476	10.17	9.52	10.61	-1.08	6.35e-05	0.000185
3R	23309247	23310338	9.18	8.54	9.62	-1.08	9.57e-05	0.00027
2L	14183441	14184008	8.21	7.57	8.65	-1.08	9.71e-05	0.000274
3R	31719535	31719835	7.68	7.04	8.12	-1.08	0.000117	0.000324
3R	30414403	30415553	9.63	8.99	10.07	-1.08	0.00182	0.00401
3L	6721856	6722250	6.52	5.88	6.96	-1.08	0.00411	0.00836
4	611573	612022	7.5	6.86	7.94	-1.08	0.00523	0.0104
2L	21684471	21684876	6.02	5.38	6.46	-1.08	0.0151	0.0271
4	395507	395807	5.64	5	6.08	-1.08	0.0261	0.0443
2R	10548240	10548681	13.19	12.54	13.64	-1.09	3.75e-07	1.58e-06
X	20497009	20499966	10.31	9.67	10.75	-1.09	1.31e-06	5.11e-06
2R	19843372	19845214	10.5	9.86	10.95	-1.09	5.31e-06	1.87e-05
3L	17418031	17418713	8.99	8.34	9.43	-1.09	7.48e-06	2.56e-05
2R	13979516	13980161	8.57	7.92	9.01	-1.09	6.04e-05	0.000177
3R	23498372	23499222	7.6	6.96	8.04	-1.09	0.000128	0.000352
3L	16764267	16765843	10.39	9.75	10.83	-1.09	0.000173	0.000465
3L	20710652	20711312	8.01	7.36	8.45	-1.09	0.000792	0.00187
2L	14527443	14528254	8.08	7.43	8.53	-1.09	0.000989	0.0023
2L	19773606	19773995	6.74	6.1	7.19	-1.09	0.00137	0.00309
2L	19458236	19461237	9.57	8.92	10.01	-1.09	0.00164	0.00365
2R	24841326	24841859	6.78	6.14	7.22	-1.09	0.00201	0.00438
3L	16435463	16436450	7.46	6.82	7.9	-1.09	0.00212	0.00461
X	6345944	6346342	6.98	6.34	7.43	-1.09	0.0029	0.0061
X	3429772	3430074	6.58	5.93	7.03	-1.09	0.00351	0.00724
2L	7148579	7148912	6.07	5.42	6.51	-1.09	0.00688	0.0133
3L	24741955	24742839	6.84	6.19	7.28	-1.09	0.0117	0.0215
3L	10277404	10277810	5.84	5.2	6.29	-1.09	0.0217	0.0375
2R	17575920	17576266	6.24	5.6	6.68	-1.09	0.0221	0.0381
X	3429163	3429463	5.66	5.01	6.1	-1.09	0.0278	0.0469
2R	19262398	19268379	13.64	12.99	14.09	-1.1	1.58e-07	7.06e-07
3R	10603039	10604852	10.38	9.73	10.82	-1.1	2.14e-06	8.04e-06
3L	12832814	12833393	8.56	7.91	9.01	-1.1	5.88e-05	0.000172
3R	10573464	10573870	9.11	8.45	9.56	-1.1	9.93e-05	0.000279
3L	20633619	20634495	8.27	7.61	8.72	-1.1	0.000117	0.000326
X	19773733	19774354	7.53	6.88	7.98	-1.1	0.00016	0.000433
3R	16338088	16338401	7.3	6.65	7.75	-1.1	0.00136	0.00308
X	14866974	14867852	7.25	6.59	7.69	-1.1	0.0015	0.00336
3R	29555582	29556617	7.82	7.17	8.27	-1.1	0.00179	0.00395
2R	8155534	8156437	6.72	6.07	7.17	-1.1	0.00234	0.00504
X	7222117	7222862	6.73	6.07	7.18	-1.1	0.00569	0.0112
3L	14002096	14002421	7.39	6.73	7.83	-1.1	0.0183	0.0321
3R	4985427	4990852	11.39	10.73	11.85	-1.11	4.41e-07	1.85e-06
3L	3057064	3057928	11.18	10.52	11.63	-1.11	1.97e-06	7.45e-06
3R	16783301	16788159	11.11	10.45	11.56	-1.11	3.63e-06	1.31e-05
2L	2160558	2161282	9.33	8.68	9.78	-1.11	1.3e-05	4.29e-05
2R	9859569	9859915	8.35	7.69	8.8	-1.11	1.51e-05	4.89e-05
3R	30106914	30107488	8.89	8.23	9.35	-1.11	2.25e-05	7.04e-05
4	75428	76610	10.5	9.84	10.95	-1.11	4.29e-05	0.000129
2L	11343911	11346050	9.61	8.95	10.06	-1.11	4.44e-05	0.000133
X	1602889	1604138	7.64	6.98	8.09	-1.11	0.000185	0.000494
3R	5207978	5208752	8.22	7.56	8.67	-1.11	0.000401	0.001
3R	19055199	19056853	8.67	8.01	9.12	-1.11	0.000854	0.002
3L	15802127	15803313	8.55	7.89	9	-1.11	0.00265	0.00563
2L	10690357	10691172	6.71	6.05	7.16	-1.11	0.00907	0.0171
2R	23034080	23034683	7.17	6.51	7.62	-1.11	0.0113	0.0209
3R	25636735	25639060	10.55	9.89	11.01	-1.12	6.48e-08	3.03e-07
3L	3977124	3980810	14.28	13.61	14.73	-1.12	1.34e-07	6.05e-07
2L	15759739	15762025	9.97	9.3	10.43	-1.12	4.05e-06	1.45e-05
2L	8883586	8885559	11.96	11.3	12.42	-1.12	1.26e-05	4.13e-05
3R	5109177	5111693	11.92	11.26	12.38	-1.12	1.32e-05	4.33e-05
2R	25048998	25050208	8.5	7.84	8.96	-1.12	1.76e-05	5.62e-05
2L	2999316	3000716	8.82	8.15	9.27	-1.12	2.11e-05	6.67e-05
3L	15225553	15225948	8.4	7.73	8.85	-1.12	2.21e-05	6.93e-05
2L	7331840	7332435	7.68	7.02	8.13	-1.12	6.89e-05	0.0002
2L	13883462	13885477	9.76	9.09	10.21	-1.12	8.14e-05	0.000233
X	6719637	6719944	8.31	7.65	8.77	-1.12	8.63e-05	0.000246
X	17715436	17716189	8.15	7.49	8.61	-1.12	0.000148	0.000401
3L	12038806	12039493	7.18	6.51	7.63	-1.12	0.000232	0.000609
2L	19771002	19772839	8.35	7.69	8.81	-1.12	0.000321	0.000819
2L	21366343	21366700	7.17	6.5	7.62	-1.12	0.000361	0.00091
2L	7361175	7364103	8.56	7.9	9.01	-1.12	0.00169	0.00374
X	17172559	17173617	6.74	6.08	7.19	-1.12	0.00171	0.00379
3L	13880024	13880512	6.39	5.72	6.85	-1.12	0.00748	0.0144
X	13116150	13116847	5.98	5.32	6.44	-1.12	0.0235	0.0403
2L	7991474	7992182	9.32	8.65	9.78	-1.13	9.66e-07	3.85e-06
3R	29303577	29306059	12.98	12.31	13.44	-1.13	1.07e-06	4.24e-06
2L	7600898	7602279	9.24	8.57	9.7	-1.13	3.48e-06	1.27e-05
2R	17332902	17335857	11.88	11.21	12.34	-1.13	3.82e-06	1.38e-05
2R	13022178	13023075	11.06	10.39	11.52	-1.13	5.35e-06	1.88e-05
3R	6971898	6974087	8.51	7.83	8.97	-1.13	1.3e-05	4.27e-05
X	17160289	17161024	10.92	10.25	11.38	-1.13	1.91e-05	6.1e-05
2L	21820410	21821366	7.87	7.19	8.32	-1.13	2.94e-05	9.06e-05
3R	15919667	15921444	11.67	10.99	12.12	-1.13	4.56e-05	0.000136
3R	14736847	14737290	7.03	6.35	7.48	-1.13	0.000243	0.000638
X	19696391	19696801	6.97	6.29	7.43	-1.13	0.000721	0.00172
X	7201759	7202357	6.96	6.28	7.41	-1.13	0.00107	0.00247
3L	21381317	21381900	7.95	7.28	8.41	-1.13	0.00127	0.00289
X	20238097	20238769	6.51	5.83	6.97	-1.13	0.00333	0.00691
4	62153	62499	6.02	5.34	6.48	-1.13	0.00407	0.00829
3R	21607912	21608294	6.71	6.04	7.17	-1.13	0.00646	0.0126
3L	1098449	1098807	8.35	7.67	8.8	-1.13	0.00841	0.016
3L	14183386	14184008	6.54	5.86	6.99	-1.13	0.017	0.0301
4	412199	412683	5.64	4.97	6.1	-1.13	0.0194	0.0339
2R	13187661	13191528	11.5	10.82	11.96	-1.14	2.56e-07	1.1e-06
3R	25995982	25997442	11.78	11.1	12.24	-1.14	3.57e-07	1.51e-06
3L	6700294	6701399	9.62	8.94	10.08	-1.14	4.87e-06	1.72e-05
2R	11797089	11798560	8.12	7.45	8.58	-1.14	1.18e-05	3.88e-05
2L	4376299	4377261	9.48	8.8	9.94	-1.14	2.53e-05	7.87e-05
2L	18806699	18807527	8.19	7.51	8.66	-1.14	5.13e-05	0.000152
3R	9527080	9528013	8.53	7.85	8.99	-1.14	0.00024	0.000631
2L	9137271	9137571	6.69	6.01	7.15	-1.14	0.00044	0.00109
2R	18238262	18238581	6.97	6.28	7.43	-1.14	0.000572	0.00139
X	7256403	7257119	7.02	6.34	7.48	-1.14	0.000743	0.00177
3L	18420329	18420927	7	6.32	7.46	-1.14	0.0117	0.0214
3L	16569754	16570054	5.9	5.22	6.36	-1.14	0.0182	0.0319
3R	23448865	23449498	6.21	5.53	6.67	-1.14	0.0207	0.0359
2R	10263798	10265518	13.78	13.1	14.25	-1.15	2.54e-08	1.27e-07
3L	11014547	11015881	9.71	9.02	10.18	-1.15	3.15e-06	1.15e-05
2L	19068414	19069454	9.29	8.6	9.75	-1.15	6.42e-06	2.22e-05
3L	15201405	15202552	8.21	7.52	8.67	-1.15	1.4e-05	4.57e-05
3L	17934463	17934863	7.44	6.75	7.9	-1.15	3.29e-05	0.000101
X	8421621	8422646	8.16	7.47	8.63	-1.15	8.05e-05	0.000231
3R	31950002	31951442	10.78	10.1	11.24	-1.15	9.33e-05	0.000264
2L	9703721	9704363	8.24	7.56	8.71	-1.15	0.000189	0.000504
2L	6826772	6827675	6.43	5.74	6.9	-1.15	0.00111	0.00256
2L	14629813	14630462	6.98	6.29	7.44	-1.15	0.00227	0.0049
X	1307175	1307489	6.23	5.54	6.69	-1.15	0.0026	0.00553
2R	12987947	12988247	6.43	5.74	6.89	-1.15	0.0171	0.0302
2L	5234201	5236846	11.85	11.16	12.32	-1.16	2.96e-07	1.27e-06
3R	26006458	26006812	12.43	11.74	12.9	-1.16	4.67e-07	1.96e-06
3L	8665368	8667863	12.12	11.43	12.58	-1.16	1.17e-06	4.59e-06
3R	15685465	15685978	8.23	7.54	8.7	-1.16	2.95e-06	1.08e-05
X	7316567	7318855	10.22	9.52	10.68	-1.16	3.09e-06	1.13e-05
X	6984750	6985236	10.05	9.36	10.52	-1.16	9.5e-06	3.18e-05
2R	6559517	6560661	8.72	8.03	9.19	-1.16	2.05e-05	6.49e-05
3L	4016915	4017652	7.35	6.65	7.82	-1.16	4.14e-05	0.000125
3L	2388729	2389110	7.22	6.52	7.68	-1.16	8.78e-05	0.00025
3L	10239910	10240903	7.13	6.43	7.6	-1.16	0.000146	0.000396
3R	26029848	26030500	7.1	6.4	7.56	-1.16	0.00023	0.000606
X	18999357	19000099	6.73	6.04	7.2	-1.16	0.000405	0.00101
3L	15009857	15010157	7.12	6.43	7.59	-1.16	0.000685	0.00164
2L	7309141	7310024	6.99	6.3	7.46	-1.16	0.001	0.00233
X	13108357	13109258	7.96	7.27	8.43	-1.16	0.00123	0.0028
3L	20631170	20632225	6.88	6.18	7.35	-1.16	0.00135	0.00305
2R	11499200	11499579	6.36	5.67	6.83	-1.16	0.00883	0.0167
2L	18748435	18749264	5.98	5.29	6.45	-1.16	0.00888	0.0168
3R	23745513	23745841	5.9	5.2	6.37	-1.16	0.0119	0.0219
2L	2133396	2133696	7.26	6.56	7.72	-1.16	0.0141	0.0254
X	16772563	16776429	12.65	11.95	13.12	-1.17	2.51e-07	1.08e-06
3R	9024181	9026550	10.19	9.49	10.66	-1.17	6.86e-07	2.8e-06
2L	7089016	7089678	10.33	9.63	10.8	-1.17	1.8e-06	6.83e-06
3R	10887622	10888421	7.83	7.13	8.3	-1.17	2.03e-05	6.43e-05
2L	14513139	14513565	8.74	8.04	9.21	-1.17	2.13e-05	6.74e-05
3L	10298893	10300306	8.05	7.35	8.52	-1.17	5.17e-05	0.000153
2L	1965112	1967503	9.13	8.43	9.6	-1.17	5.18e-05	0.000153
3L	15311050	15311354	8.02	7.32	8.49	-1.17	5.76e-05	0.000169
2R	20032118	20032692	7.18	6.48	7.65	-1.17	9.75e-05	0.000275
2L	19849832	19850182	8.16	7.46	8.63	-1.17	0.000102	0.000287
3R	6816096	6816539	10.71	10.01	11.18	-1.17	0.000146	0.000397
3R	18072266	18073495	7.91	7.2	8.38	-1.17	0.000219	0.000578
4	1079559	1080812	7.51	6.82	7.98	-1.17	0.000232	0.000611
2L	1673407	1673886	6.72	6.02	7.19	-1.17	0.0015	0.00338
2L	14672182	14672853	7.09	6.39	7.56	-1.17	0.00162	0.00361
X	16837020	16837377	6.35	5.65	6.82	-1.17	0.00666	0.0129
2L	18761929	18762708	6.28	5.58	6.75	-1.17	0.00784	0.015
3L	20565891	20566670	6.32	5.62	6.79	-1.17	0.00964	0.018
2L	5473957	5474557	5.74	5.04	6.21	-1.17	0.0115	0.0211
2L	8732890	8733353	5.96	5.26	6.43	-1.17	0.0139	0.025
3R	26037878	26040495	11.93	11.22	12.41	-1.18	1.74e-07	7.74e-07
2L	12669667	12671984	11.26	10.56	11.73	-1.18	9.42e-07	3.76e-06
2L	15441307	15443237	12.42	11.71	12.89	-1.18	2.98e-06	1.1e-05
3L	9025223	9026370	8.45	7.74	8.92	-1.18	7.21e-06	2.47e-05
X	10212507	10213019	7.39	6.68	7.86	-1.18	0.000324	0.000824
X	2788312	2788848	7.85	7.14	8.32	-1.18	0.000461	0.00114
X	10343948	10344464	7.63	6.92	8.1	-1.18	0.000796	0.00188
X	7580053	7580754	6.57	5.86	7.04	-1.18	0.003	0.0063
2L	3645574	3646265	6.81	6.1	7.28	-1.18	0.00357	0.00735
3L	19180733	19181033	6.12	5.41	6.6	-1.18	0.00442	0.00895
2R	22897478	22897998	5.99	5.28	6.46	-1.18	0.00472	0.00951
2L	429394	429700	6.31	5.6	6.78	-1.18	0.00676	0.0131
2L	5457715	5458321	6.43	5.73	6.91	-1.18	0.0111	0.0205
3L	6877761	6878187	5.59	4.89	6.06	-1.18	0.0123	0.0225
2L	8080794	8081392	6.19	5.48	6.66	-1.18	0.0162	0.0288
3R	23042283	23043352	10.84	10.12	11.31	-1.19	9.19e-06	3.09e-05
X	16208221	16208542	7.67	6.96	8.15	-1.19	9.31e-06	3.12e-05
3L	6381863	6382943	7.78	7.06	8.25	-1.19	1.32e-05	4.32e-05
3L	1359715	1360662	7.99	7.28	8.47	-1.19	1.83e-05	5.86e-05
3L	6990265	6990580	8.11	7.4	8.59	-1.19	0.000114	0.000316
2R	25119893	25121849	9.35	8.63	9.82	-1.19	0.000137	0.000375
X	8579563	8580309	7.74	7.03	8.22	-1.19	0.000653	0.00157
2L	18875277	18876058	6.58	5.87	7.06	-1.19	0.00069	0.00165
2R	23645458	23646077	7.18	6.47	7.66	-1.19	0.00164	0.00365
2L	16761011	16761341	6.47	5.75	6.95	-1.19	0.003	0.0063
3L	78370	79051	6.56	5.84	7.03	-1.19	0.0044	0.0089
3L	7832133	7832688	5.7	4.98	6.18	-1.19	0.0266	0.0451
3L	3438433	3440021	10.13	9.41	10.61	-1.2	2.14e-08	1.08e-07
3L	13653700	13654609	8.91	8.19	9.38	-1.2	1.72e-06	6.55e-06
3L	8557362	8558265	8.71	7.99	9.19	-1.2	2.25e-06	8.42e-06
3L	16568052	16569626	9.66	8.93	10.14	-1.2	3.3e-06	1.2e-05
3L	14965561	14967861	11.03	10.31	11.51	-1.2	4.56e-06	1.62e-05
2L	8989489	8990235	8.56	7.84	9.04	-1.2	6.99e-06	2.4e-05
X	778124	780574	9.82	9.1	10.3	-1.2	8.13e-06	2.76e-05
2L	11805645	11808607	12.53	11.81	13	-1.2	1.35e-05	4.4e-05
2L	8846588	8847822	8.41	7.69	8.88	-1.2	1.4e-05	4.55e-05
3L	9852386	9852778	7.25	6.53	7.73	-1.2	6.69e-05	0.000195
X	6728926	6729226	7.32	6.59	7.8	-1.2	9.26e-05	0.000263
3R	15592126	15592837	7.61	6.89	8.09	-1.2	0.000354	0.000895
2L	21067954	21068513	6.81	6.09	7.29	-1.2	0.000594	0.00144
3R	13648175	13648532	7.32	6.59	7.8	-1.2	0.000703	0.00168
3R	6985738	6986323	6.51	5.79	6.99	-1.2	0.0015	0.00338
2R	18432838	18433738	6.91	6.19	7.39	-1.2	0.00252	0.00539
3R	27202832	27203655	5.89	5.16	6.36	-1.2	0.00825	0.0157
X	440543	441094	6.21	5.5	6.69	-1.2	0.0119	0.0219
2L	371461	371934	5.55	4.83	6.03	-1.2	0.0183	0.032
2R	12020021	12021756	14.53	13.8	15.01	-1.21	1.84e-08	9.33e-08
2L	3776481	3778903	12.78	12.05	13.26	-1.21	1.23e-07	5.57e-07
X	17730306	17730918	8.72	7.99	9.21	-1.21	2.08e-07	9.04e-07
3R	8670765	8671446	8.45	7.72	8.93	-1.21	2.9e-06	1.06e-05
3L	12576620	12577790	12.37	11.64	12.85	-1.21	3.97e-06	1.43e-05
X	5972905	5973438	7.59	6.86	8.07	-1.21	3.53e-05	0.000107
2R	19908318	19908930	6.93	6.2	7.42	-1.21	7.1e-05	0.000205
3R	4669851	4670271	7.31	6.58	7.79	-1.21	9.3e-05	0.000264
3R	14067050	14068041	7.41	6.68	7.89	-1.21	0.000344	0.000873
3L	17392026	17393107	6.56	5.83	7.04	-1.21	0.0084	0.016
2L	14420592	14421204	6.72	5.99	7.2	-1.21	0.00909	0.0171
3L	3846221	3846594	6.54	5.81	7.02	-1.21	0.00926	0.0174
2L	20913983	20914392	6.21	5.48	6.69	-1.21	0.0146	0.0262
X	18529946	18533404	11.66	10.92	12.14	-1.22	1.82e-08	9.25e-08
2R	6602974	6608895	12.24	11.5	12.72	-1.22	1.85e-07	8.18e-07
X	4453642	4456266	10.34	9.61	10.82	-1.22	5.62e-07	2.32e-06
2R	14428701	14432435	11.49	10.76	11.98	-1.22	1.13e-06	4.46e-06
2L	13205443	13206807	9.34	8.61	9.82	-1.22	1.58e-06	6.05e-06
2R	10580596	10581456	10.05	9.32	10.54	-1.22	1.63e-05	5.23e-05
3L	18317538	18318533	7.63	6.9	8.12	-1.22	7.74e-05	0.000222
3R	7104411	7105439	8.65	7.91	9.13	-1.22	0.000107	0.000299
2R	8632928	8634243	9.05	8.31	9.53	-1.22	0.000109	0.000305
3R	10604999	10605300	9.12	8.39	9.6	-1.22	0.000141	0.000385
2L	5894490	5895102	6.59	5.85	7.07	-1.22	0.000353	0.000894
2R	17078172	17078820	6.94	6.21	7.42	-1.22	0.000609	0.00147
2R	16456495	16457393	7.09	6.36	7.58	-1.22	0.000768	0.00182
2R	15721051	15721927	7.67	6.94	8.16	-1.22	0.00252	0.00538
2L	14300975	14301570	6.65	5.92	7.14	-1.22	0.00313	0.00655
2R	13612842	13613915	8.78	8.03	9.26	-1.23	1.31e-07	5.93e-07
3L	13029368	13030035	8.57	7.83	9.06	-1.23	2.03e-06	7.65e-06
3L	19046347	19046807	7.91	7.17	8.4	-1.23	5.62e-06	1.97e-05
2R	9980522	9982803	11.11	10.36	11.6	-1.23	2.32e-05	7.28e-05
3L	8927837	8928146	7.15	6.41	7.63	-1.23	2.43e-05	7.59e-05
3R	23320371	23320944	8.33	7.59	8.81	-1.23	0.000111	0.000309
3R	26796071	26796826	7.81	7.06	8.29	-1.23	0.000182	0.000486
3R	5101776	5102117	7.53	6.79	8.02	-1.23	0.000315	0.000805
2L	7438945	7439893	7.69	6.94	8.18	-1.23	0.000478	0.00118
2R	6017186	6017710	7.13	6.39	7.62	-1.23	0.000707	0.00169
3R	7990958	7991527	6.4	5.66	6.89	-1.23	0.000992	0.0023
3L	726291	726848	6.98	6.24	7.47	-1.23	0.00204	0.00443
3R	21418257	21418599	5.86	5.12	6.35	-1.23	0.00458	0.00925
3R	31947948	31948471	6.02	5.28	6.51	-1.23	0.0164	0.0292
2R	9713573	9715854	13.92	13.17	14.41	-1.24	2.19e-07	9.51e-07
3R	25648322	25648992	9.7	8.95	10.19	-1.24	4.87e-07	2.03e-06
3R	17702965	17703509	9.51	8.76	10	-1.24	1.55e-06	5.95e-06
3L	734703	736771	8.6	7.85	9.09	-1.24	2.69e-06	9.96e-06
3L	11018147	11019433	7.57	6.83	8.06	-1.24	6.6e-05	0.000192
3L	9568199	9569159	7.38	6.62	7.87	-1.24	0.000109	0.000304
3R	16788456	16789119	8.42	7.67	8.91	-1.24	0.000372	0.000934
X	15149751	15150129	6.39	5.64	6.88	-1.24	0.00468	0.00943
2L	1315725	1316156	6.21	5.46	6.7	-1.24	0.00532	0.0106
3L	644273	646611	13.89	13.13	14.38	-1.25	6.88e-11	4.78e-10
3R	16250851	16251752	9.3	8.54	9.79	-1.25	2.24e-07	9.7e-07
3R	24867668	24868647	9.48	8.73	9.98	-1.25	2.85e-06	1.05e-05
3R	29255321	29255621	7.78	7.02	8.28	-1.25	9.51e-05	0.000269
2L	1970411	1971107	8.42	7.66	8.91	-1.25	0.000128	0.000352
3L	12038190	12038673	7.41	6.66	7.9	-1.25	0.000145	0.000396
2L	21068698	21069160	6.85	6.09	7.34	-1.25	0.000246	0.000644
X	4508049	4509254	7.91	7.15	8.4	-1.25	0.00244	0.00523
3R	8561619	8562005	6.02	5.27	6.51	-1.25	0.00914	0.0172
3R	27592893	27593492	5.63	4.87	6.12	-1.25	0.0123	0.0225
3L	18401678	18404284	10.3	9.54	10.8	-1.26	3.62e-09	2.02e-08
2R	7378408	7380776	12.99	12.23	13.49	-1.26	1.48e-08	7.62e-08
X	10828864	10830723	12.05	11.29	12.55	-1.26	1.83e-08	9.33e-08
2L	3827676	3828448	10.14	9.38	10.64	-1.26	3.17e-07	1.35e-06
3R	6843999	6845415	8.28	7.52	8.78	-1.26	2.63e-06	9.74e-06
2R	22511807	22512288	8.03	7.27	8.53	-1.26	2.79e-06	1.03e-05
2L	5429863	5432505	11.51	10.75	12.01	-1.26	3.36e-06	1.22e-05
2L	7149188	7150195	7.81	7.05	8.31	-1.26	9.55e-06	3.19e-05
2L	7519085	7520634	8.41	7.65	8.9	-1.26	1.22e-05	4e-05
2R	17465341	17465950	7.72	6.96	8.22	-1.26	1.56e-05	5.03e-05
4	606478	606908	7.5	6.74	8	-1.26	1.78e-05	5.69e-05
X	16767014	16767394	7.38	6.61	7.87	-1.26	4.35e-05	0.00013
3L	22597249	22597949	7.63	6.86	8.12	-1.26	6.9e-05	0.0002
3L	3308430	3309347	8.67	7.91	9.16	-1.26	0.0002	0.000532
X	15673508	15674184	6.92	6.15	7.41	-1.26	0.000337	0.000857
3L	4395753	4396053	6.33	5.57	6.83	-1.26	0.00065	0.00156
3L	1729589	1730099	9.11	8.35	9.61	-1.26	0.000665	0.00159
X	4446886	4447859	6.79	6.03	7.29	-1.26	0.00738	0.0142
3L	7937983	7938504	5.55	4.79	6.05	-1.26	0.0122	0.0222
X	6022455	6023307	8.93	8.15	9.43	-1.27	4.39e-07	1.84e-06
X	2049508	2050406	10.41	9.64	10.91	-1.27	5.8e-07	2.39e-06
3R	7132940	7135176	11.08	10.32	11.58	-1.27	1e-06	3.98e-06
2R	10873842	10874979	9.5	8.73	10	-1.27	3.49e-06	1.27e-05
3L	10344044	10346188	11.2	10.42	11.7	-1.27	5.46e-06	1.91e-05
2R	5937185	5938757	9.48	8.7	9.98	-1.27	5.85e-06	2.04e-05
3L	7957022	7958599	10.45	9.68	10.95	-1.27	7.07e-06	2.42e-05
3R	30720230	30721163	8.4	7.63	8.9	-1.27	1.67e-05	5.36e-05
2L	5468619	5469960	8.16	7.39	8.65	-1.27	2.17e-05	6.83e-05
3L	10335684	10336544	9.02	8.25	9.52	-1.27	9.08e-05	0.000258
3L	14958330	14959159	6.59	5.82	7.09	-1.27	0.000124	0.000342
3R	23387276	23388706	8.59	7.82	9.09	-1.27	0.000176	0.000473
3L	3846919	3847777	6.79	6.02	7.29	-1.27	0.000355	0.000897
2R	8602008	8603096	7.34	6.57	7.84	-1.27	0.000592	0.00143
3L	7614298	7614707	7.88	7.11	8.38	-1.27	0.000806	0.0019
X	2408092	2408818	7.28	6.51	7.77	-1.27	0.000907	0.00212
2R	9678848	9679185	6.97	6.2	7.47	-1.27	0.00198	0.00433
3L	4307619	4308137	5.77	4.99	6.27	-1.27	0.0297	0.0498
2R	15912662	15914252	13.05	12.27	13.55	-1.28	2.21e-07	9.61e-07
2R	24925624	24927990	10.55	9.78	11.06	-1.28	2.3e-07	9.94e-07
2R	9712979	9713452	9.03	8.25	9.54	-1.28	5.28e-07	2.19e-06
X	20724171	20726640	8.85	8.07	9.35	-1.28	3.75e-06	1.35e-05
2R	22247138	22248738	9.44	8.66	9.94	-1.28	5.36e-06	1.88e-05
X	1094528	1096093	7.99	7.21	8.5	-1.28	1.24e-05	4.1e-05
2R	17263405	17263894	6.81	6.03	7.31	-1.28	9.93e-05	0.000279
2L	15105153	15106192	7.23	6.46	7.74	-1.28	0.000102	0.000287
3R	16034126	16034473	6.75	5.97	7.25	-1.28	0.000102	0.000287
2L	2327110	2327747	6.73	5.95	7.23	-1.28	0.000114	0.000316
3R	11341311	11342271	7.05	6.27	7.55	-1.28	0.000179	0.00048
3L	1499860	1500545	7.3	6.52	7.8	-1.28	0.000536	0.00131
2R	9276631	9277085	8.09	7.31	8.59	-1.28	0.00104	0.0024
3L	4339882	4340424	6.17	5.39	6.67	-1.28	0.00158	0.00353
2R	20920121	20920861	7.47	6.69	7.97	-1.28	0.00868	0.0164
X	9665196	9665496	5.26	4.48	5.76	-1.28	0.0139	0.025
X	17500389	17501701	9.82	9.03	10.32	-1.29	5.85e-09	3.16e-08
3R	26024550	26028724	13.12	12.33	13.62	-1.29	1.33e-08	6.84e-08
X	7569527	7572528	10.64	9.85	11.15	-1.29	1.69e-08	8.66e-08
3R	19624625	19625654	9.47	8.69	9.98	-1.29	1.07e-07	4.89e-07
3L	6465352	6466688	10.46	9.68	10.97	-1.29	1e-06	3.96e-06
3R	25049856	25050185	9.94	9.15	10.44	-1.29	3.59e-06	1.3e-05
3R	15652224	15652964	7.81	7.02	8.31	-1.29	3.78e-06	1.36e-05
3L	19643710	19644898	7.55	6.76	8.06	-1.29	1.98e-05	6.29e-05
3L	19033893	19034311	6.47	5.69	6.98	-1.29	0.000611	0.00148
2R	14268522	14269042	6.64	5.86	7.14	-1.29	0.000615	0.00149
X	5044205	5045089	7.78	6.99	8.28	-1.29	0.000727	0.00173
X	6800535	6800964	6.9	6.11	7.4	-1.29	0.00147	0.00332
X	2131449	2132061	7.36	6.57	7.87	-1.29	0.00279	0.00591
2R	15600159	15600722	6.37	5.58	6.87	-1.29	0.00304	0.00637
2L	8696145	8696695	6.25	5.47	6.75	-1.29	0.00449	0.00908
2L	7295983	7296442	7.25	6.47	7.76	-1.29	0.00719	0.0139
X	1189587	1189947	6.47	5.69	6.98	-1.29	0.0114	0.021
3R	10593575	10593954	6.22	5.44	6.73	-1.29	0.0134	0.0242
2R	11396918	11399200	13.07	12.28	13.57	-1.3	7.81e-09	4.15e-08
2L	12638860	12643891	13.19	12.4	13.7	-1.3	1.01e-08	5.3e-08
X	2386320	2387334	9.07	8.28	9.58	-1.3	3.31e-08	1.62e-07
3R	14677847	14678643	8.3	7.51	8.81	-1.3	1.95e-07	8.51e-07
X	10579534	10580202	8.04	7.25	8.55	-1.3	6.08e-07	2.5e-06
X	7321817	7322527	9.02	8.22	9.52	-1.3	7.99e-06	2.72e-05
3R	5729309	5730069	8.35	7.56	8.86	-1.3	9.01e-06	3.03e-05
2L	14200657	14201292	7.78	6.99	8.28	-1.3	1.93e-05	6.15e-05
2L	14546782	14547764	7.21	6.42	7.72	-1.3	0.000132	0.000363
3R	21847469	21847928	6.4	5.62	6.91	-1.3	0.00273	0.00578
X	20687067	20689077	10.44	9.64	10.95	-1.31	7.02e-09	3.75e-08
X	7560104	7562605	11.24	10.45	11.75	-1.31	1e-08	5.25e-08
2R	7326344	7327265	9.72	8.92	10.23	-1.31	1.06e-08	5.55e-08
X	841030	842047	9.6	8.8	10.11	-1.31	2.01e-08	1.01e-07
3L	18314825	18317437	12.19	11.39	12.7	-1.31	2.57e-07	1.11e-06
3R	16237571	16238188	8.76	7.96	9.28	-1.31	5.12e-07	2.12e-06
X	15678569	15680820	9.5	8.7	10.01	-1.31	9.1e-07	3.64e-06
3L	14650320	14652056	8.68	7.88	9.19	-1.31	5.32e-06	1.87e-05
2L	1667508	1668164	8.45	7.65	8.96	-1.31	2.15e-05	6.78e-05
2R	14803575	14804703	7.44	6.64	7.95	-1.31	3.34e-05	0.000102
2L	1384311	1384611	6.8	6	7.31	-1.31	6.92e-05	0.0002
3L	1818925	1819268	7.01	6.21	7.52	-1.31	8.67e-05	0.000247
3R	10205767	10206202	7.67	6.88	8.18	-1.31	0.000126	0.000348
3L	12440371	12440998	6.51	5.71	7.02	-1.31	0.000277	0.000717
3R	16717585	16717949	7.13	6.33	7.64	-1.31	0.0017	0.00378
2L	14661101	14661782	6.13	5.33	6.64	-1.31	0.00254	0.00541
X	20643376	20646176	11.22	10.42	11.74	-1.32	3.86e-09	2.14e-08
3L	15700025	15700888	8.1	7.3	8.62	-1.32	3.55e-07	1.5e-06
2R	18106131	18107378	7.59	6.79	8.11	-1.32	6.34e-06	2.19e-05
3L	12391353	12391653	8.73	7.93	9.24	-1.32	1.25e-05	4.13e-05
2R	14208399	14209011	8.5	7.69	9.01	-1.32	1.34e-05	4.39e-05
X	12221465	12222579	8.43	7.63	8.95	-1.32	1.45e-05	4.71e-05
3L	22132766	22133605	8.03	7.22	8.55	-1.32	2.03e-05	6.43e-05
4	708279	708677	7.98	7.17	8.49	-1.32	4.33e-05	0.00013
3L	15007515	15007869	7.31	6.51	7.83	-1.32	5.06e-05	0.00015
2L	15483298	15484469	6.84	6.04	7.36	-1.32	0.000145	0.000394
3R	14434810	14435278	6.6	5.79	7.11	-1.32	0.000292	0.000752
3L	15847071	15847717	6.35	5.54	6.86	-1.32	0.00093	0.00217
X	387142	387480	6.13	5.32	6.64	-1.32	0.00258	0.0055
2L	19222220	19224119	11.83	11.01	12.35	-1.33	2.66e-09	1.52e-08
2L	21007766	21009885	10.76	9.94	11.27	-1.33	5.62e-09	3.05e-08
2L	21847514	21851567	11.9	11.09	12.42	-1.33	7.07e-09	3.77e-08
X	7594208	7596826	10.87	10.06	11.39	-1.33	1.56e-08	8.01e-08
2L	21854505	21857253	12.43	11.62	12.95	-1.33	3.46e-08	1.69e-07
X	11884137	11884551	7.59	6.78	8.11	-1.33	4.68e-06	1.66e-05
3L	454929	455946	8.46	7.65	8.98	-1.33	1.39e-05	4.53e-05
3L	21577709	21579319	8.95	8.14	9.47	-1.33	1.74e-05	5.57e-05
X	7590865	7591527	6.27	5.46	6.79	-1.33	0.000453	0.00112
3L	8359564	8360599	7.04	6.23	7.56	-1.33	0.000671	0.00161
2L	20896944	20897862	6.7	5.89	7.22	-1.33	0.000777	0.00184
3R	8847190	8848677	9.88	9.05	10.4	-1.34	8.55e-10	5.2e-09
2R	22255640	22256005	9.2	8.39	9.72	-1.34	1.01e-07	4.65e-07
X	9133822	9134122	7.75	6.93	8.27	-1.34	2.65e-07	1.14e-06
3R	28858257	28858557	8.64	7.82	9.16	-1.34	4.99e-07	2.07e-06
2R	22394983	22395845	7.69	6.86	8.21	-1.34	4.96e-06	1.75e-05
3R	22432166	22432466	6.86	6.04	7.37	-1.34	0.000199	0.000529
3L	3408068	3408730	8.51	7.69	9.03	-1.34	0.00026	0.000676
2L	8451504	8452474	7.05	6.23	7.57	-1.34	0.000268	0.000694
3L	21462346	21462698	6.68	5.85	7.2	-1.34	0.00183	0.00403
Y	1434688	1435344	5.6	4.78	6.12	-1.34	0.00461	0.00929
3R	21643068	21645366	12.57	11.74	13.09	-1.35	8.9e-10	5.4e-09
3L	15045683	15047904	9.97	9.14	10.5	-1.35	2.45e-09	1.4e-08
3R	12258821	12264140	12.83	12	13.35	-1.35	1.08e-08	5.62e-08
2L	21658328	21658681	8	7.17	8.52	-1.35	3.59e-07	1.52e-06
2L	4363424	4364345	7.48	6.65	8	-1.35	4.71e-06	1.67e-05
3R	30415722	30421188	12.15	11.32	12.67	-1.35	6.32e-06	2.19e-05
2L	20958381	20958729	6.76	5.94	7.29	-1.35	0.00012	0.000333
2L	15427738	15428038	6.73	5.9	7.25	-1.35	0.000237	0.000622
2R	19370742	19371613	7.11	6.28	7.64	-1.35	0.00042	0.00105
2R	25106781	25107182	5.69	4.87	6.22	-1.35	0.0108	0.02
X	14712946	14713246	5.56	4.73	6.08	-1.35	0.0153	0.0274
3R	30756774	30757426	10.02	9.19	10.55	-1.36	1.31e-07	5.91e-07
3R	30340532	30341211	8.14	7.31	8.67	-1.36	1.91e-07	8.38e-07
3R	16824178	16826019	9.41	8.58	9.93	-1.36	6.94e-07	2.82e-06
3L	20294156	20295157	7.52	6.69	8.05	-1.36	9.34e-06	3.13e-05
3R	18047856	18048603	8.84	8	9.37	-1.36	1.35e-05	4.41e-05
2R	8658042	8658431	7.86	7.03	8.39	-1.36	4.88e-05	0.000145
2L	16310156	16310530	8.09	7.25	8.62	-1.36	5.44e-05	0.00016
2R	21451598	21451979	6.37	5.54	6.9	-1.36	0.000173	0.000465
X	1139432	1139940	7.13	6.3	7.66	-1.36	0.000245	0.000642
3L	3096099	3096711	7.49	6.66	8.02	-1.36	0.00304	0.00637
3L	4107913	4108491	5.92	5.08	6.44	-1.36	0.00764	0.0146
2R	22641649	22642432	7.12	6.29	7.65	-1.36	0.0102	0.019
3R	16872858	16876644	10.64	9.8	11.17	-1.37	1.13e-08	5.87e-08
X	17340952	17342187	7.7	6.86	8.23	-1.37	2.67e-07	1.15e-06
2L	3588930	3589998	8.15	7.31	8.67	-1.37	3.63e-07	1.54e-06
3L	22603539	22606620	11.02	10.18	11.54	-1.37	4.73e-07	1.97e-06
3L	4158971	4159865	8.73	7.89	9.26	-1.37	5.77e-07	2.38e-06
3L	15248681	15249586	8.07	7.22	8.6	-1.37	1.55e-06	5.94e-06
2L	18749371	18750987	7.65	6.8	8.17	-1.37	4.34e-06	1.55e-05
3R	11311443	11312428	7.46	6.62	7.99	-1.37	2.7e-05	8.36e-05
2L	4595452	4595752	5.38	4.54	5.91	-1.37	0.0082	0.0156
3R	19317926	19319918	13.92	13.06	14.45	-1.38	3.87e-12	3.15e-11
X	10940563	10941226	8.67	7.83	9.2	-1.38	2.22e-08	1.12e-07
3L	19559943	19561490	9.45	8.59	9.98	-1.38	3.27e-08	1.6e-07
3R	14005842	14007244	10.51	9.66	11.04	-1.38	5.22e-08	2.48e-07
2R	20067569	20068958	9.68	8.83	10.21	-1.38	7.81e-08	3.63e-07
2L	15731275	15733652	9.61	8.77	10.14	-1.38	4.42e-07	1.85e-06
2L	13801657	13802276	8.27	7.43	8.81	-1.38	4.49e-06	1.6e-05
3L	19197637	19198060	6.79	5.94	7.32	-1.38	7.09e-05	0.000205
X	16150585	16152149	9.29	8.44	9.82	-1.38	0.000119	0.000329
3R	29577942	29578737	6.17	5.33	6.7	-1.38	0.000977	0.00227
3R	22433391	22433907	5.94	5.09	6.47	-1.38	0.00705	0.0136
2L	8700063	8700586	5.9	5.05	6.43	-1.38	0.00767	0.0147
X	3136405	3138455	12.49	11.63	13.02	-1.39	7.49e-11	5.19e-10
X	6986363	6988102	12.86	12	13.4	-1.39	7.68e-10	4.71e-09
2R	9974928	9977266	11.76	10.9	12.29	-1.39	3.69e-09	2.05e-08
X	2324351	2327523	9.94	9.08	10.47	-1.39	4.03e-09	2.23e-08
4	701730	704998	11.28	10.42	11.81	-1.39	5.38e-09	2.93e-08
X	7496656	7500160	10.59	9.73	11.12	-1.39	3.18e-08	1.56e-07
X	16125874	16126879	8.31	7.45	8.84	-1.39	3.74e-08	1.82e-07
3L	18192274	18195313	9.17	8.31	9.7	-1.39	3.98e-08	1.92e-07
3L	3074162	3074702	9.8	8.94	10.33	-1.39	2.29e-07	9.92e-07
3L	3393797	3394155	7.94	7.09	8.48	-1.39	3.91e-07	1.65e-06
2L	12632758	12635030	8.71	7.85	9.25	-1.39	1.76e-06	6.7e-06
3L	10290699	10290999	5.37	4.51	5.91	-1.39	0.0102	0.019
3R	8223704	8227438	12.98	12.12	13.52	-1.4	1.68e-11	1.26e-10
2L	12607588	12610622	11.83	10.97	12.37	-1.4	3.49e-10	2.25e-09
2R	21044088	21046673	11.78	10.92	12.32	-1.4	4.35e-09	2.4e-08
X	18523825	18525582	9.52	8.66	10.06	-1.4	1.98e-08	1e-07
X	2399308	2399920	9.5	8.63	10.03	-1.4	1.21e-06	4.74e-06
3L	11010956	11011334	7.08	6.21	7.62	-1.4	3.08e-05	9.45e-05
2L	11309182	11309835	7.23	6.36	7.77	-1.4	3.18e-05	9.74e-05
3L	4270845	4271995	8.48	7.61	9.01	-1.4	7.45e-05	0.000214
2R	11386855	11387177	5.9	5.03	6.43	-1.4	0.00115	0.00265
2R	10691564	10691941	6.09	5.23	6.63	-1.4	0.00169	0.00374
X	3428511	3428811	5.44	4.57	5.98	-1.4	0.00413	0.0084
3L	14147505	14148146	5.81	4.94	6.35	-1.4	0.00775	0.0148
3R	25630662	25631012	10.28	9.41	10.82	-1.41	2.16e-10	1.42e-09
2R	12460695	12462396	12.53	11.66	13.07	-1.41	4.47e-10	2.84e-09
3R	30412003	30414279	9.66	8.8	10.2	-1.41	2.66e-09	1.52e-08
3L	21738891	21739682	8.19	7.32	8.73	-1.41	1.52e-08	7.82e-08
3R	10149291	10149930	7.94	7.07	8.48	-1.41	4.12e-06	1.48e-05
2R	22523257	22525067	9.39	8.52	9.93	-1.41	5.02e-06	1.77e-05
2L	2730430	2730836	7.65	6.78	8.18	-1.41	2.71e-05	8.39e-05
3L	10787050	10787501	7.16	6.29	7.7	-1.41	4.21e-05	0.000127
2R	6968746	6969096	9	8.12	9.55	-1.42	8.2e-08	3.79e-07
3R	10999135	10999754	7.53	6.65	8.07	-1.42	4.71e-07	1.97e-06
3R	14412231	14413271	9.13	8.25	9.67	-1.42	1.17e-06	4.61e-06
3L	10291137	10291951	7.09	6.21	7.63	-1.42	5.11e-06	1.8e-05
3L	22924403	22924777	8.85	7.97	9.39	-1.42	2.06e-05	6.53e-05
3R	26016338	26016657	7.3	6.42	7.85	-1.42	3.72e-05	0.000113
3R	7959439	7959901	6.4	5.53	6.95	-1.42	0.00318	0.00663
X	15793234	15793800	6.61	5.73	7.15	-1.42	0.00521	0.0104
4	1087063	1088345	8.12	7.23	8.66	-1.43	1.2e-08	6.21e-08
3R	30237344	30238412	8.63	7.74	9.17	-1.43	1.45e-07	6.48e-07
3R	15988418	15989546	7.78	6.89	8.32	-1.43	4.17e-06	1.5e-05
2R	17444402	17445418	7.88	6.99	8.43	-1.43	6.39e-06	2.21e-05
3R	18018115	18018857	6.9	6.01	7.44	-1.43	0.00017	0.000457
2R	13032879	13033225	7.57	6.68	8.11	-1.43	0.000779	0.00184
3R	27214811	27215184	6.1	5.22	6.65	-1.43	0.00138	0.00312
3R	9608557	9609483	6.96	6.07	7.5	-1.43	0.00175	0.00386
2L	10562049	10562349	5.67	4.79	6.22	-1.43	0.00186	0.00408
2L	14426900	14427512	5.89	5	6.43	-1.43	0.00287	0.00606
4	1088527	1088827	6.34	5.46	6.89	-1.43	0.00651	0.0127
3R	16841811	16842358	6.28	5.4	6.82	-1.43	0.0195	0.034
3L	14157830	14159358	10.99	10.1	11.54	-1.44	1.49e-09	8.8e-09
3L	12082303	12082622	9.36	8.47	9.9	-1.44	3.81e-08	1.84e-07
2R	25022196	25022899	10.44	9.54	10.98	-1.44	4.98e-07	2.07e-06
2R	13006649	13007381	7.42	6.53	7.97	-1.44	3.56e-06	1.29e-05
X	10837540	10838957	8.15	7.25	8.69	-1.44	6.9e-06	2.37e-05
2L	8297878	8298178	5.6	4.71	6.15	-1.44	0.00359	0.00739
3L	5876953	5880461	13.22	12.32	13.77	-1.45	3.29e-10	2.13e-09
2L	14481118	14483798	10.12	9.22	10.67	-1.45	3.69e-09	2.05e-08
3L	15354882	15355548	13.82	12.93	14.37	-1.45	1.18e-08	6.14e-08
3R	24579789	24581297	9.8	8.9	10.35	-1.45	5.73e-08	2.71e-07
2R	23649798	23650712	8.19	7.29	8.74	-1.45	7.58e-08	3.53e-07
3L	14595077	14595689	7.77	6.87	8.33	-1.45	1.36e-07	6.14e-07
3L	3396065	3396677	8.15	7.25	8.7	-1.45	6.09e-07	2.5e-06
X	5698518	5700552	8.37	7.47	8.92	-1.45	6.36e-07	2.6e-06
3L	21649893	21650580	8.69	7.8	9.24	-1.45	9.5e-07	3.79e-06
3R	29382611	29384810	8.94	8.05	9.49	-1.45	9.54e-07	3.8e-06
2L	18497310	18498156	7.33	6.43	7.88	-1.45	8.93e-06	3.01e-05
3R	4856751	4857188	7.45	6.55	8	-1.45	9.24e-06	3.1e-05
3R	22204251	22204698	9.34	8.44	9.89	-1.45	0.000149	0.000406
X	17163591	17163939	5.84	4.95	6.39	-1.45	0.000924	0.00215
3L	16875869	16876433	6.2	5.3	6.75	-1.45	0.00118	0.00271
X	15024112	15024788	6.12	5.22	6.67	-1.45	0.0013	0.00296
2R	9493452	9493845	5.78	4.88	6.33	-1.45	0.0033	0.00684
3L	7606569	7607080	5.77	4.86	6.32	-1.45	0.00536	0.0107
2R	6197259	6197631	6.53	5.63	7.08	-1.45	0.0076	0.0146
3R	30786688	30787609	6.79	5.9	7.34	-1.45	0.00916	0.0172
2R	19794755	19800927	14.2	13.29	14.75	-1.46	1.48e-12	1.26e-11
X	603059	604040	11.3	10.39	11.85	-1.46	1.38e-10	9.24e-10
3R	24275033	24276462	10.18	9.27	10.73	-1.46	4.4e-09	2.43e-08
4	467501	469576	10.96	10.05	11.51	-1.46	6.57e-09	3.53e-08
2R	15131444	15132701	9.22	8.31	9.77	-1.46	1.91e-08	9.67e-08
X	13310877	13311222	7.46	6.55	8.02	-1.46	1.27e-07	5.78e-07
2L	8867842	8868764	7.7	6.79	8.25	-1.46	2.53e-07	1.09e-06
2L	20887203	20887833	8	7.1	8.56	-1.46	2.92e-07	1.25e-06
X	19849901	19850543	8.71	7.8	9.26	-1.46	5.53e-07	2.29e-06
2L	21020154	21020454	6.42	5.51	6.97	-1.46	0.000145	0.000395
4	628133	629054	6.58	5.68	7.14	-1.46	0.00101	0.00234
4	386956	387431	5.92	5.02	6.48	-1.46	0.00295	0.00621
4	387436	388194	5.92	5.02	6.48	-1.46	0.00398	0.00811
2L	10569322	10571861	11.72	10.8	12.27	-1.47	1.11e-09	6.62e-09
3R	30229121	30230352	10.27	9.35	10.82	-1.47	4.58e-09	2.52e-08
3R	7077951	7078761	8.21	7.3	8.77	-1.47	9.65e-09	5.08e-08
X	10537750	10538836	8.75	7.84	9.3	-1.47	2.64e-08	1.32e-07
3L	9093168	9093780	8.32	7.4	8.88	-1.47	9.68e-08	4.45e-07
3R	26929461	26930019	8.5	7.59	9.06	-1.47	1.53e-07	6.85e-07
2R	13464367	13465106	7.93	7.01	8.48	-1.47	4.72e-07	1.97e-06
2L	20353867	20354284	7.91	7	8.47	-1.47	7.36e-07	2.98e-06
2L	13226703	13227755	7.21	6.3	7.77	-1.47	2.68e-06	9.9e-06
4	992598	993261	7.51	6.6	8.07	-1.47	8.25e-06	2.8e-05
2L	19575574	19576030	9.17	8.25	9.72	-1.47	1.88e-05	6.02e-05
3R	14090088	14090757	7.35	6.43	7.9	-1.47	8.66e-05	0.000247
3L	10271410	10272589	9.08	8.17	9.64	-1.47	9.18e-05	0.00026
3R	29519429	29519956	6.4	5.49	6.96	-1.47	0.000104	0.00029
3L	21961927	21962335	7.37	6.46	7.93	-1.47	0.00126	0.00288
X	8666745	8667045	5.24	4.33	5.8	-1.47	0.00428	0.00867
4	1160463	1160869	6.1	5.18	6.65	-1.47	0.00626	0.0123
2L	21699886	21700249	5.53	4.61	6.08	-1.47	0.0106	0.0197
X	7614583	7619304	12.73	11.81	13.29	-1.48	7.45e-14	7.33e-13
3R	29509596	29511214	8.96	8.04	9.52	-1.48	3.31e-09	1.86e-08
X	2410749	2411092	7.78	6.86	8.33	-1.48	3.74e-08	1.82e-07
X	9699668	9700603	7.42	6.5	7.98	-1.48	4.34e-06	1.55e-05
2L	3856798	3857224	6.73	5.81	7.28	-1.48	0.000146	0.000397
X	19363519	19363900	6.38	5.46	6.94	-1.48	0.000759	0.0018
2L	15288765	15289160	5.64	4.72	6.2	-1.48	0.00987	0.0184
3R	10792588	10792888	8.75	7.82	9.31	-1.49	9.01e-10	5.46e-09
2L	8149491	8150981	9.44	8.52	10	-1.49	1.83e-08	9.31e-08
3R	19821184	19822000	7.81	6.89	8.37	-1.49	2.87e-08	1.42e-07
3L	17000394	17000934	8.05	7.12	8.61	-1.49	4.74e-06	1.68e-05
X	12467458	12468875	7.82	6.89	8.38	-1.49	1.3e-05	4.26e-05
3R	12083450	12084329	6.95	6.02	7.51	-1.49	1.37e-05	4.46e-05
2R	18675262	18676668	6.67	5.75	7.23	-1.49	3.99e-05	0.00012
3R	23433163	23433863	7.04	6.12	7.6	-1.49	4.28e-05	0.000129
3L	17371966	17372300	6.58	5.64	7.14	-1.49	6.8e-05	0.000198
X	10089002	10089651	6.36	5.43	6.92	-1.49	0.000144	0.000392
2L	3534532	3535175	7.17	6.24	7.73	-1.49	0.000277	0.000716
X	1970013	1970472	6.07	5.14	6.63	-1.49	0.00051	0.00125
2R	23058192	23058804	6.19	5.26	6.75	-1.49	0.00165	0.00367
X	2412165	2415216	13.77	12.83	14.33	-1.5	2.23e-12	1.87e-11
2L	9980752	9981543	8.21	7.28	8.78	-1.5	1.74e-08	8.88e-08
X	4392763	4393559	6.95	6.01	7.52	-1.5	1.31e-06	5.11e-06
3R	8944061	8944733	7.2	6.26	7.76	-1.5	4.41e-06	1.57e-05
3R	30779039	30779983	7.4	6.46	7.96	-1.5	4.5e-06	1.61e-05
2R	22862732	22863032	7.24	6.3	7.8	-1.5	7.3e-06	2.5e-05
3R	16944120	16944669	6.81	5.88	7.38	-1.5	9.22e-06	3.09e-05
2L	6188217	6188629	7	6.07	7.57	-1.5	0.000342	0.000868
3R	16938713	16939225	6.26	5.32	6.82	-1.5	0.000692	0.00166
2R	14766466	14766789	5.92	4.99	6.49	-1.5	0.00218	0.00471
X	5968476	5969550	9.8	8.85	10.36	-1.51	5.49e-09	2.98e-08
3R	25999768	26000088	7.55	6.61	8.12	-1.51	5.34e-08	2.54e-07
3R	24893984	24894503	7.76	6.82	8.33	-1.51	1.83e-07	8.09e-07
2L	18898846	18899738	8.21	7.27	8.78	-1.51	2.16e-06	8.09e-06
2R	7278718	7279114	8.37	7.42	8.93	-1.51	5.07e-06	1.78e-05
X	1316383	1316744	6.93	5.99	7.5	-1.51	2.11e-05	6.67e-05
3R	30485523	30486301	7.59	6.64	8.15	-1.51	2.85e-05	8.82e-05
2L	20368951	20369617	6.61	5.67	7.18	-1.51	6.45e-05	0.000188
2R	20044562	20045285	6.67	5.73	7.24	-1.51	0.000104	0.000291
X	17361070	17362542	8.9	7.96	9.46	-1.51	0.000229	0.000603
X	7271973	7278113	14.97	14.02	15.54	-1.52	5.02e-16	6.01e-15
2R	12544449	12545734	11.61	10.66	12.18	-1.52	2.44e-12	2.04e-11
3L	21450694	21452313	11.03	10.08	11.6	-1.52	3.94e-11	2.8e-10
2R	20836266	20838090	8.49	7.54	9.06	-1.52	6.53e-09	3.5e-08
2R	25243141	25245036	10.57	9.62	11.14	-1.52	6.45e-08	3.02e-07
3R	16515525	16516137	7.51	6.56	8.08	-1.52	7.49e-08	3.49e-07
2L	3346150	3346843	8.04	7.09	8.61	-1.52	1.27e-07	5.76e-07
3L	14477310	14478425	7.76	6.81	8.33	-1.52	1.39e-07	6.23e-07
4	1003785	1004802	8.64	7.69	9.21	-1.52	5.02e-07	2.09e-06
X	5898156	5898567	7.52	6.57	8.09	-1.52	1.47e-06	5.66e-06
3L	5571695	5572565	6.99	6.04	7.56	-1.52	1.69e-05	5.41e-05
3R	10463011	10463332	7.74	6.79	8.31	-1.52	5.13e-05	0.000152
2R	13150932	13151468	7.03	6.08	7.6	-1.52	5.7e-05	0.000167
2L	20299281	20299999	6.78	5.83	7.35	-1.52	0.000164	0.000441
2L	14317904	14318624	6.33	5.37	6.9	-1.52	0.00125	0.00286
3R	19340556	19340953	5.63	4.69	6.2	-1.52	0.00317	0.00661
X	8728336	8728724	5.43	4.48	6	-1.52	0.0083	0.0158
3L	9034245	9036496	9.76	8.8	10.34	-1.53	1.16e-11	8.89e-11
3R	23913890	23915211	7.75	6.79	8.32	-1.53	1.95e-08	9.9e-08
3L	20592642	20594044	7.99	7.03	8.56	-1.53	4.77e-08	2.28e-07
X	4212752	4213765	7.12	6.16	7.69	-1.53	6.21e-07	2.55e-06
3L	15734107	15734409	9.57	8.61	10.15	-1.53	1.51e-05	4.89e-05
3L	18245384	18245792	6.52	5.57	7.1	-1.53	7.39e-05	0.000213
2R	23624120	23624917	6.55	5.59	7.12	-1.53	0.000314	0.000804
X	9595750	9596459	7.76	6.8	8.33	-1.53	0.000402	0.001
3L	21035295	21036444	10.46	9.49	11.03	-1.54	1.15e-10	7.77e-10
3L	3408930	3409236	9.27	8.3	9.84	-1.54	5.44e-09	2.95e-08
3L	14438653	14439282	8.13	7.16	8.7	-1.54	1.57e-08	8.06e-08
2L	6100097	6100958	8.11	7.14	8.68	-1.54	1.8e-08	9.18e-08
3R	16892284	16893061	7.12	6.15	7.69	-1.54	1.18e-06	4.63e-06
3L	22471818	22472154	6.92	5.96	7.5	-1.54	3.06e-06	1.12e-05
2L	7332596	7333715	7.24	6.27	7.82	-1.54	3.72e-06	1.34e-05
X	4390649	4391794	7.37	6.4	7.94	-1.54	7.45e-06	2.55e-05
3L	18313695	18314566	7.04	6.07	7.61	-1.54	1.05e-05	3.49e-05
3L	2821304	2822255	7.19	6.23	7.76	-1.54	1.34e-05	4.38e-05
2R	5784401	5784985	6.93	5.97	7.51	-1.54	1.64e-05	5.29e-05
3L	666911	667830	6.46	5.49	7.03	-1.54	0.000493	0.00121
2L	6012632	6013091	5.86	4.89	6.43	-1.54	0.000955	0.00222
3R	4354094	4354904	6.45	5.48	7.02	-1.54	0.00123	0.00281
3R	8317404	8317748	5.51	4.54	6.08	-1.54	0.00721	0.0139
3L	4227114	4227540	9.36	8.38	9.93	-1.55	1.23e-11	9.37e-11
3R	20952208	20953317	10.28	9.31	10.85	-1.55	1.01e-10	6.9e-10
X	15816440	15817780	11.84	10.87	12.42	-1.55	2.62e-10	1.72e-09
2L	17539958	17541614	11.39	10.41	11.97	-1.55	4.58e-10	2.91e-09
3R	4960266	4960876	7.23	6.26	7.81	-1.55	8.2e-08	3.79e-07
3R	30798853	30799819	7.25	6.27	7.82	-1.55	5.25e-07	2.18e-06
3L	18219540	18220323	6.37	5.4	6.95	-1.55	3.7e-05	0.000112
3R	21984601	21985237	6.71	5.74	7.29	-1.55	0.000144	0.000392
3R	25085670	25086112	6.1	5.12	6.67	-1.55	0.000254	0.000662
X	21590754	21591232	6.06	5.09	6.63	-1.55	0.000306	0.000784
2R	20077121	20077634	5.36	4.38	5.93	-1.55	0.00412	0.00837
3R	26085280	26085610	5.69	4.72	6.27	-1.55	0.00811	0.0155
3R	19298011	19302516	12.33	11.35	12.91	-1.56	4.37e-13	3.97e-12
3R	11368744	11371148	11.38	10.4	11.96	-1.56	1.97e-11	1.47e-10
X	5891150	5893073	10.52	9.53	11.1	-1.56	2.92e-11	2.13e-10
2R	8230912	8233664	12.08	11.1	12.66	-1.56	3.1e-11	2.24e-10
3R	26023504	26024442	10.33	9.35	10.91	-1.56	4.01e-08	1.93e-07
3R	14460092	14460583	8.03	7.05	8.6	-1.56	7.84e-08	3.64e-07
3L	22389016	22389917	7.65	6.67	8.23	-1.56	8.02e-08	3.72e-07
X	15544901	15545760	7.47	6.49	8.04	-1.56	1.2e-07	5.47e-07
3L	15217857	15218788	7.75	6.77	8.33	-1.56	1.19e-06	4.66e-06
2L	13863082	13863523	6.55	5.57	7.12	-1.56	2.28e-05	7.15e-05
3L	18267441	18267781	6.85	5.87	7.43	-1.56	3.47e-05	0.000106
3R	29210630	29210930	6.62	5.64	7.19	-1.56	7.49e-05	0.000215
X	4561381	4562521	6.99	6	7.57	-1.56	0.000141	0.000385
2L	13851695	13852478	7.25	6.27	7.83	-1.56	0.000563	0.00137
X	15632391	15633003	6.28	5.3	6.86	-1.56	0.000773	0.00183
3R	26937592	26938521	7.12	6.14	7.69	-1.56	0.00102	0.00237
2R	10276952	10277347	7.37	6.39	7.95	-1.56	0.00134	0.00303
2R	8249909	8250209	5.47	4.49	6.05	-1.56	0.00474	0.00954
3R	26618090	26618439	5.44	4.47	6.02	-1.56	0.0146	0.0262
X	2393985	2399206	11.95	10.96	12.53	-1.57	1.35e-13	1.29e-12
2L	1403473	1405820	9.95	8.96	10.53	-1.57	5.99e-10	3.73e-09
3L	14974159	14975176	9.51	8.51	10.09	-1.57	3.02e-09	1.71e-08
3L	3384559	3385620	8.15	7.17	8.73	-1.57	3.42e-09	1.92e-08
3L	165822	166221	7.75	6.76	8.33	-1.57	2.02e-08	1.02e-07
3R	14484619	14485459	7.37	6.38	7.95	-1.57	5.63e-07	2.32e-06
X	4673532	4673906	6.79	5.8	7.37	-1.57	2.12e-06	7.97e-06
2R	12963974	12964573	7.37	6.38	7.95	-1.57	8.17e-06	2.78e-05
2R	15832921	15833768	7.11	6.12	7.69	-1.57	8.97e-06	3.02e-05
3L	15043812	15044229	6.8	5.81	7.38	-1.57	3.17e-05	9.71e-05
2L	5495709	5497605	7.74	6.75	8.33	-1.57	3.29e-05	0.000101
3R	5307725	5308097	6.86	5.87	7.44	-1.57	9.09e-05	0.000258
4	443437	443803	6.56	5.57	7.14	-1.57	0.000158	0.000428
X	8656493	8656897	5.95	4.96	6.53	-1.57	0.00039	0.000976
2R	13431037	13431691	7.62	6.62	8.2	-1.58	2.77e-09	1.57e-08
2R	22397460	22397760	8.27	7.28	8.86	-1.58	1.06e-08	5.55e-08
2L	5459338	5461390	8.36	7.36	8.94	-1.58	1e-07	4.59e-07
2L	1885996	1886887	8.1	7.1	8.68	-1.58	1.41e-07	6.32e-07
X	19222278	19223290	7.55	6.55	8.13	-1.58	1.84e-07	8.13e-07
3L	429692	430574	7.14	6.15	7.73	-1.58	7.11e-07	2.88e-06
2R	8605429	8605787	7.43	6.44	8.02	-1.58	2.41e-06	8.99e-06
3L	3981091	3981438	6.89	5.89	7.47	-1.58	8.18e-06	2.78e-05
2L	20768482	20769577	6.78	5.78	7.36	-1.58	0.000101	0.000283
2L	2461264	2462680	8.81	7.8	9.39	-1.59	9.98e-11	6.8e-10
3R	14743342	14744293	8.38	7.37	8.96	-1.59	5.74e-10	3.59e-09
2L	21804708	21806094	8.29	7.29	8.88	-1.59	6.34e-10	3.94e-09
2L	11452948	11453896	9.62	8.62	10.2	-1.59	1.29e-09	7.64e-09
3L	6764593	6766397	11.09	10.08	11.67	-1.59	2.3e-09	1.32e-08
4	523978	524317	8.39	7.38	8.97	-1.59	2.73e-09	1.55e-08
3L	10320063	10322653	9.52	8.52	10.11	-1.59	6.43e-09	3.45e-08
2R	7429912	7430911	7.39	6.39	7.97	-1.59	3e-08	1.48e-07
3R	14585408	14586105	8.45	7.44	9.03	-1.59	3.84e-08	1.86e-07
3L	10266729	10267794	10.21	9.21	10.8	-1.59	1.08e-06	4.26e-06
3R	4780285	4781219	6.83	5.82	7.41	-1.59	1.58e-06	6.06e-06
2R	10720905	10721593	6.93	5.93	7.52	-1.59	2.07e-06	7.78e-06
3L	10339413	10339879	6.65	5.64	7.23	-1.59	2.29e-06	8.55e-06
3R	16353519	16353841	7.1	6.1	7.68	-1.59	1.33e-05	4.35e-05
3L	3679745	3680045	5.19	4.19	5.78	-1.59	0.00666	0.0129
X	19782426	19784202	11.79	10.78	12.38	-1.6	4.01e-13	3.66e-12
2R	9709873	9711085	10.98	9.96	11.57	-1.6	4.89e-12	3.92e-11
3R	25194881	25195518	8.63	7.62	9.22	-1.6	2.38e-11	1.76e-10
2R	8657088	8657941	8.44	7.43	9.03	-1.6	7.7e-09	4.09e-08
2L	19809808	19812069	11.85	10.84	12.44	-1.6	1.21e-08	6.26e-08
3R	29706253	29707436	9.59	8.58	10.18	-1.6	3.14e-08	1.55e-07
2L	15337686	15339203	7.7	6.69	8.29	-1.6	4.9e-08	2.34e-07
2R	8646658	8647047	7.59	6.58	8.18	-1.6	1.87e-07	8.22e-07
3L	14148580	14149351	7.24	6.23	7.83	-1.6	3.27e-07	1.39e-06
3L	6697447	6698429	7.58	6.57	8.17	-1.6	7.02e-07	2.85e-06
3R	10830545	10831167	8.12	7.11	8.71	-1.6	1.36e-06	5.29e-06
X	413157	414006	6.71	5.7	7.3	-1.6	0.000259	0.000672
X	16813843	16814428	5.7	4.69	6.29	-1.6	0.00113	0.00259
2L	18920330	18920791	5.86	4.84	6.45	-1.6	0.00206	0.00448
2R	8182013	8183654	13.08	12.06	13.67	-1.61	1.52e-09	8.92e-09
2R	12462504	12463473	9.63	8.61	10.22	-1.61	6.4e-09	3.44e-08
3L	14123441	14124377	7.84	6.82	8.43	-1.61	1.52e-08	7.81e-08
2L	3612754	3614028	8.49	7.47	9.08	-1.61	6.31e-08	2.96e-07
3L	635146	635611	7.77	6.75	8.36	-1.61	1.35e-07	6.1e-07
3R	17052628	17053057	7.64	6.63	8.23	-1.61	1.56e-07	6.98e-07
3L	18345735	18346239	7.18	6.17	7.77	-1.61	1.1e-06	4.35e-06
3R	30731198	30731833	6.79	5.78	7.39	-1.61	3.92e-06	1.41e-05
X	4988800	4989100	6.21	5.2	6.8	-1.61	0.000246	0.000644
2R	19964673	19965018	5.48	4.46	6.07	-1.61	0.00351	0.00725
3L	6834506	6834819	6.33	5.31	6.92	-1.61	0.00477	0.00959
2L	21865969	21867012	9.75	8.73	10.34	-1.62	5.43e-11	3.8e-10
X	4584121	4586754	11.54	10.52	12.14	-1.62	1.09e-10	7.4e-10
3L	21587567	21588634	9.48	8.45	10.07	-1.62	2.63e-09	1.5e-08
3R	30219508	30220245	8.29	7.27	8.88	-1.62	2.69e-08	1.34e-07
2L	10001417	10001978	7.5	6.47	8.09	-1.62	3.43e-08	1.68e-07
X	2048361	2048753	7.99	6.96	8.58	-1.62	1.87e-07	8.25e-07
2L	21867113	21867446	8.14	7.11	8.73	-1.62	4.3e-07	1.81e-06
3R	6329550	6329850	6.7	5.68	7.3	-1.62	6.63e-06	2.28e-05
3R	21238414	21239378	6.98	5.96	7.58	-1.62	4.44e-05	0.000133
3L	16815755	16816461	7.03	6	7.62	-1.62	0.000165	0.000446
2L	15324456	15325046	5.96	4.94	6.56	-1.62	0.000309	0.000791
X	3872835	3873225	5.74	4.71	6.33	-1.62	0.00408	0.00832
2L	17564399	17566302	13.04	12.01	13.64	-1.63	8.36e-15	8.99e-14
3L	10233063	10237648	12.54	11.51	13.14	-1.63	9.17e-14	8.93e-13
2R	19841213	19841533	8.48	7.44	9.07	-1.63	4.24e-10	2.71e-09
3L	624347	624716	8.24	7.21	8.84	-1.63	1.7e-09	9.93e-09
3R	12645267	12645803	7.58	6.55	8.18	-1.63	5.49e-09	2.98e-08
3R	17062305	17063377	9.24	8.2	9.84	-1.64	3.69e-12	3.01e-11
2R	21161177	21161584	8.6	7.55	9.2	-1.64	2.06e-11	1.53e-10
3R	29574919	29577656	9.27	8.24	9.87	-1.64	3.19e-11	2.3e-10
X	15689843	15690463	8.58	7.54	9.18	-1.64	4.79e-11	3.37e-10
X	16219100	16220504	8.17	7.12	8.77	-1.64	3.1e-10	2.01e-09
3L	21589457	21591652	9.74	8.71	10.34	-1.64	5.37e-10	3.39e-09
2L	17770524	17771516	9.39	8.35	9.98	-1.64	1.01e-09	6.07e-09
2L	5437648	5438763	8.87	7.82	9.46	-1.64	2.53e-09	1.45e-08
3L	16567168	16567862	8.31	7.27	8.91	-1.64	3e-09	1.7e-08
3L	15785884	15788111	7.52	6.48	8.12	-1.64	1.48e-06	5.69e-06
3R	22777749	22778411	7.61	6.57	8.21	-1.64	2.74e-06	1.01e-05
2L	21091470	21091875	6.96	5.91	7.56	-1.64	6.76e-05	0.000196
3R	29283874	29284265	6.38	5.34	6.98	-1.64	7.44e-05	0.000214
2R	7422729	7423038	5.41	4.37	6.01	-1.64	0.00743	0.0143
2L	7068867	7069493	5.54	4.49	6.14	-1.64	0.013	0.0236
3R	23142045	23145030	10.24	9.2	10.84	-1.65	4.34e-11	3.07e-10
2L	2161416	2162083	9.48	8.43	10.08	-1.65	3.02e-10	1.96e-09
3L	20554749	20555113	6.58	5.53	7.18	-1.65	2.38e-06	8.89e-06
X	21078647	21079283	7.14	6.1	7.74	-1.65	2.42e-06	9.02e-06
3R	8471486	8472098	8.74	7.68	9.34	-1.66	3.16e-11	2.28e-10
3L	2866164	2868535	11.74	10.69	12.34	-1.66	3.66e-11	2.62e-10
2R	9404835	9405299	8.44	7.38	9.04	-1.66	7.12e-10	4.38e-09
2L	6533938	6534817	7.77	6.71	8.37	-1.66	1.55e-09	9.07e-09
2R	17027487	17028099	10.08	9.02	10.68	-1.66	1.64e-09	9.63e-09
3R	8139617	8139947	7.47	6.41	8.07	-1.66	8.58e-07	3.44e-06
3R	21700929	21701476	6.68	5.62	7.28	-1.66	0.00016	0.000432
2R	18266305	18266649	6.17	5.12	6.78	-1.66	0.0005	0.00123
3L	11243323	11243623	5.79	4.73	6.39	-1.66	0.000555	0.00135
2R	1590710	1591347	7.01	5.96	7.62	-1.66	0.000699	0.00167
2L	5751012	5751457	5.42	4.37	6.03	-1.66	0.0124	0.0226
3R	29268826	29276529	13.9	12.84	14.51	-1.67	9.46e-18	1.33e-16
3R	4952024	4955670	12.88	11.82	13.48	-1.67	4.58e-17	5.97e-16
X	6990295	6991418	9.69	8.63	10.3	-1.67	9.8e-13	8.55e-12
3L	15320099	15322238	12.26	11.2	12.87	-1.67	6.29e-12	4.98e-11
2L	11299168	11301756	10.89	9.83	11.5	-1.67	3.24e-11	2.33e-10
3L	14653335	14655110	9.03	7.97	9.64	-1.67	3.87e-08	1.87e-07
X	18259690	18260815	7.37	6.31	7.98	-1.67	1.54e-07	6.89e-07
3L	9866765	9867336	6.93	5.86	7.53	-1.67	8.4e-07	3.38e-06
2L	1746551	1747004	7.12	6.05	7.72	-1.67	1.46e-06	5.62e-06
X	21492995	21493574	8.25	7.19	8.86	-1.67	4.17e-06	1.5e-05
Y	1445173	1445785	7	5.94	7.61	-1.67	5.68e-06	1.98e-05
X	2530489	2531365	8.52	7.46	9.12	-1.67	6.12e-06	2.12e-05
X	16240218	16240761	5.53	4.46	6.14	-1.67	0.00134	0.00304
3L	24540527	24541089	5.83	4.76	6.43	-1.67	0.00585	0.0115
X	407811	411882	11.67	10.6	12.28	-1.68	1.69e-13	1.61e-12
X	7622298	7623596	9.71	8.64	10.32	-1.68	1.51e-12	1.29e-11
X	4395537	4397072	10.42	9.36	11.03	-1.68	5.11e-12	4.08e-11
2L	3583827	3584640	9.28	8.21	9.89	-1.68	4.21e-11	2.98e-10
3R	21864341	21864688	7.82	6.75	8.43	-1.68	3.16e-09	1.78e-08
2L	4886021	4886656	8.78	7.71	9.39	-1.68	3.88e-08	1.87e-07
2L	3220011	3220655	6.88	5.81	7.49	-1.68	6.52e-06	2.25e-05
2L	15315875	15316970	8.03	6.95	8.64	-1.68	9.5e-06	3.18e-05
3R	4475525	4475866	7.1	6.02	7.7	-1.68	1.18e-05	3.89e-05
X	17183555	17183887	5.43	4.35	6.04	-1.68	0.000661	0.00159
X	10580932	10581329	6.3	5.22	6.91	-1.68	0.00174	0.00384
2L	6709921	6710416	5.92	4.85	6.53	-1.68	0.002	0.00437
2R	12455086	12458717	13.17	12.09	13.78	-1.69	3.71e-12	3.02e-11
2L	15430535	15432984	9.49	8.42	10.1	-1.69	1.52e-11	1.15e-10
X	660098	660571	10.09	9.01	10.7	-1.69	3.21e-09	1.81e-08
3R	18059087	18059493	8.56	7.48	9.17	-1.69	8.96e-09	4.74e-08
2L	15434731	15436661	11.74	10.66	12.35	-1.69	8.99e-09	4.75e-08
3R	20542922	20543354	8.39	7.3	9	-1.69	2.17e-08	1.09e-07
3R	16569186	16569573	6.62	5.54	7.23	-1.69	1.61e-05	5.2e-05
3L	10962148	10962773	6.53	5.45	7.14	-1.69	5.7e-05	0.000167
2L	12201258	12201578	5.61	4.53	6.22	-1.69	0.000217	0.000575
3R	31548878	31549325	6.13	5.05	6.74	-1.69	0.000302	0.000776
2R	15692803	15693193	5.55	4.47	6.16	-1.69	0.000977	0.00227
2L	8554096	8557787	11.35	10.26	11.96	-1.7	1.15e-12	9.96e-12
3R	7106415	7107185	10.48	9.4	11.09	-1.7	8.76e-11	6e-10
3R	16877095	16879134	9.18	8.09	9.79	-1.7	5.08e-10	3.22e-09
X	602490	602975	8.42	7.33	9.03	-1.7	1.65e-09	9.65e-09
3L	2401123	2401923	7.06	5.97	7.67	-1.7	1.3e-07	5.89e-07
2L	23168325	23168663	6.22	5.13	6.83	-1.7	4.05e-05	0.000122
2R	22077660	22078688	6.93	5.85	7.55	-1.7	0.000174	0.000468
3L	15219028	15219350	5.81	4.73	6.43	-1.7	0.00152	0.00342
X	18298426	18299847	9.13	8.04	9.75	-1.71	6.99e-14	6.91e-13
3L	799224	800088	9.51	8.42	10.13	-1.71	4.94e-13	4.47e-12
2L	1424229	1425756	10.13	9.03	10.74	-1.71	1.26e-12	1.09e-11
3L	11369496	11370732	8.68	7.58	9.29	-1.71	2.32e-11	1.72e-10
2R	18238716	18239720	8.24	7.14	8.85	-1.71	6.02e-10	3.74e-09
3R	22164951	22165342	9.05	7.96	9.67	-1.71	7.16e-09	3.82e-08
2R	11402562	11404295	8.48	7.39	9.1	-1.71	3.94e-08	1.9e-07
3R	8965088	8966232	7.32	6.22	7.93	-1.71	8.66e-07	3.47e-06
X	1264061	1264362	7.18	6.08	7.79	-1.71	1.51e-05	4.9e-05
3R	28683394	28684188	6.38	5.29	7	-1.71	0.000454	0.00112
X	399849	400591	5.68	4.59	6.3	-1.71	0.00709	0.0137
3R	27188224	27190883	10.13	9.03	10.75	-1.72	8.61e-13	7.57e-12
3L	6771795	6772922	7.69	6.59	8.31	-1.72	3.58e-10	2.31e-09
3R	30105711	30106787	9.53	8.43	10.15	-1.72	3.55e-09	1.98e-08
3L	14960103	14961390	7.56	6.46	8.18	-1.72	9.63e-09	5.07e-08
3L	15245993	15246886	10.16	9.06	10.78	-1.72	4.94e-08	2.36e-07
3L	7844688	7845164	6.91	5.81	7.53	-1.72	2.26e-07	9.78e-07
X	4647032	4647332	5.69	4.59	6.31	-1.72	0.000444	0.0011
2L	10469546	10469949	5.84	4.74	6.46	-1.72	0.00562	0.0111
3R	16860588	16860888	5.04	3.94	5.66	-1.72	0.0121	0.0221
3L	20548171	20549253	7.03	5.92	7.65	-1.73	2.61e-08	1.3e-07
2R	15601544	15602197	7.01	5.9	7.63	-1.73	1.93e-07	8.49e-07
X	17912929	17913301	5.7	4.6	6.32	-1.73	0.000494	0.00122
3L	7104353	7104678	5.73	4.62	6.35	-1.73	0.00259	0.0055
3R	21603126	21603558	9.02	7.9	9.64	-1.74	2.11e-13	1.98e-12
3R	24577321	24579237	11.13	10.01	11.75	-1.74	4.98e-13	4.49e-12
X	19807391	19809464	9.18	8.06	9.8	-1.74	1.57e-12	1.34e-11
3R	30334214	30335742	11.06	9.94	11.68	-1.74	1.72e-11	1.29e-10
X	19220650	19221978	8.49	7.37	9.11	-1.74	6.1e-11	4.25e-10
X	12893607	12895543	8.48	7.36	9.1	-1.74	1.05e-09	6.32e-09
X	6609736	6610703	8.49	7.37	9.11	-1.74	1.5e-09	8.85e-09
X	3438024	3439511	7.82	6.7	8.44	-1.74	6.98e-09	3.73e-08
3R	13916257	13916889	6.56	5.44	7.18	-1.74	1.34e-06	5.18e-06
2R	17623732	17624356	7.48	6.36	8.1	-1.74	2.32e-06	8.64e-06
3R	9380269	9380608	6.42	5.3	7.04	-1.74	0.003	0.0063
3R	5715294	5718713	14.81	13.68	15.43	-1.75	5.62e-20	1.02e-18
3L	15670260	15671671	10.24	9.12	10.87	-1.75	2.67e-11	1.95e-10
3L	4407845	4408733	9.21	8.08	9.84	-1.75	2.63e-10	1.72e-09
2L	19286903	19287648	7.76	6.63	8.38	-1.75	7.22e-09	3.85e-08
3R	21125208	21125820	6.81	5.69	7.44	-1.75	2.56e-06	9.5e-06
3L	7633985	7634573	6.08	4.95	6.7	-1.75	3.36e-05	0.000102
3L	3617177	3617575	6.5	5.37	7.12	-1.75	8.78e-05	0.00025
3R	6316546	6317074	6.48	5.35	7.1	-1.75	0.000349	0.000884
3R	14759419	14759719	4.96	3.83	5.58	-1.75	0.0053	0.0105
3L	20164143	20164504	5.54	4.41	6.17	-1.75	0.0152	0.0272
3R	21533765	21536417	12.77	11.63	13.39	-1.76	2.81e-18	4.24e-17
3L	18235778	18237148	10.39	9.25	11.02	-1.76	7.41e-18	1.06e-16
3R	19323994	19325970	11.8	10.67	12.43	-1.76	6.24e-16	7.42e-15
3L	9856045	9856693	9.25	8.12	9.88	-1.76	9.42e-13	8.27e-12
X	12200398	12201404	11.19	10.05	11.81	-1.76	4.49e-12	3.62e-11
3R	5210410	5212332	10.49	9.36	11.12	-1.76	7.42e-12	5.82e-11
X	354581	355474	10.04	8.9	10.66	-1.76	3.11e-11	2.25e-10
X	7462035	7463286	8.96	7.82	9.59	-1.76	4.08e-10	2.62e-09
2R	14928934	14929323	7.56	6.43	8.19	-1.76	1.35e-08	6.98e-08
2R	22512431	22513062	6.87	5.74	7.5	-1.76	1.05e-05	3.48e-05
2L	5393229	5393726	6.48	5.35	7.1	-1.76	0.000183	0.000489
2L	21367189	21367512	5.79	4.65	6.42	-1.76	0.0003	0.00077
2L	7004069	7004565	5.72	4.58	6.34	-1.76	0.000311	0.000796
X	14688401	14689058	6.01	4.88	6.64	-1.76	0.000576	0.0014
2L	19206918	19207218	4.59	3.46	5.22	-1.76	0.0195	0.034
2R	16155036	16156929	10.46	9.32	11.09	-1.77	1.52e-16	1.9e-15
X	3297538	3298390	8.5	7.36	9.13	-1.77	3.43e-12	2.81e-11
3R	26878243	26878675	8.21	7.07	8.84	-1.77	7.98e-10	4.88e-09
3L	10849321	10849700	8.13	6.99	8.76	-1.77	1.07e-09	6.4e-09
2L	15351650	15352816	7.55	6.41	8.18	-1.77	4.52e-06	1.61e-05
2L	19783849	19784467	6.68	5.54	7.31	-1.77	1.18e-05	3.88e-05
3L	786506	786806	6.06	4.92	6.69	-1.77	2.9e-05	8.94e-05
X	2543971	2544272	5.85	4.71	6.48	-1.77	4.77e-05	0.000142
3L	12294362	12294794	6.48	5.34	7.11	-1.77	0.000951	0.00221
3R	30332168	30332942	9.58	8.43	10.21	-1.78	1.99e-11	1.48e-10
3L	18224394	18224926	8.26	7.1	8.89	-1.78	2.98e-11	2.16e-10
3R	18232489	18235855	12.43	11.27	13.06	-1.78	4.89e-11	3.44e-10
3L	11380145	11380677	8.07	6.93	8.71	-1.78	7.66e-11	5.3e-10
X	17352812	17353744	8.1	6.96	8.73	-1.78	4.56e-09	2.51e-08
X	8648763	8649375	6.41	5.26	7.05	-1.78	3.22e-06	1.18e-05
X	3134781	3136003	11.18	10.02	11.81	-1.79	5.85e-17	7.56e-16
3R	18228083	18231039	12.22	11.06	12.85	-1.79	1.56e-16	1.94e-15
3L	9026847	9027513	7.95	6.79	8.58	-1.79	2.52e-12	2.1e-11
2L	11413279	11414757	10.9	9.74	11.53	-1.79	4.33e-12	3.51e-11
X	1317507	1318618	7.5	6.34	8.13	-1.79	2.24e-08	1.13e-07
2R	25122842	25123725	6.14	4.99	6.78	-1.79	8.36e-06	2.83e-05
X	20755987	20756380	6.95	5.79	7.58	-1.79	2.76e-05	8.53e-05
3R	4697029	4697336	6.16	5	6.79	-1.79	0.000281	0.000727
3L	21787529	21788700	12.8	11.63	13.43	-1.8	9.88e-16	1.16e-14
2R	17475703	17476453	7.63	6.47	8.27	-1.8	8.44e-10	5.14e-09
3L	771234	771999	7.61	6.45	8.25	-1.8	3.39e-09	1.9e-08
2L	2164187	2164542	8.29	7.13	8.93	-1.8	5.13e-08	2.44e-07
X	123342	123776	7.34	6.18	7.98	-1.8	6.66e-07	2.72e-06
X	4066035	4066705	5.71	4.55	6.35	-1.8	0.000644	0.00155
2R	15246852	15249504	12.01	10.84	12.65	-1.81	3.22e-17	4.24e-16
3R	16817118	16821142	11.53	10.36	12.17	-1.81	6.32e-17	8.12e-16
2L	21828767	21829254	8.56	7.39	9.2	-1.81	3.72e-13	3.41e-12
3L	12375036	12375717	9.21	8.04	9.84	-1.81	1.35e-12	1.16e-11
X	7553282	7554436	8.07	6.9	8.71	-1.81	3.64e-09	2.03e-08
X	16202161	16204042	8.11	6.93	8.75	-1.81	3.65e-09	2.03e-08
3L	13382461	13382801	7.54	6.37	8.17	-1.81	1.61e-08	8.26e-08
3R	19031973	19032273	6.81	5.64	7.45	-1.81	1.9e-05	6.05e-05
X	6730690	6731406	6.9	5.72	7.54	-1.81	2.24e-05	7.02e-05
X	827434	827773	5.97	4.8	6.61	-1.81	3.27e-05	0.0001
Y	1450757	1451468	5.86	4.69	6.5	-1.81	0.000598	0.00145
3R	26000615	26001776	12.98	11.8	13.62	-1.82	1.23e-14	1.3e-13
3L	6106579	6108414	9.54	8.36	10.18	-1.82	1.84e-14	1.91e-13
3R	16864651	16866803	10.01	8.83	10.65	-1.82	2.82e-14	2.89e-13
2L	12066385	12067438	8.91	7.73	9.55	-1.82	2.09e-13	1.97e-12
2R	16111198	16111810	8.54	7.36	9.18	-1.82	1.02e-12	8.88e-12
3R	4857725	4860036	10.92	9.75	11.56	-1.82	1.24e-10	8.35e-10
3L	11239892	11240390	7.63	6.45	8.27	-1.82	4.35e-10	2.78e-09
2R	11728696	11729046	7.87	6.69	8.51	-1.82	4.1e-08	1.97e-07
3L	21605521	21606076	7.68	6.5	8.32	-1.82	1.32e-06	5.12e-06
2L	1958076	1959543	7.04	5.86	7.68	-1.82	6.5e-06	2.24e-05
3L	6904816	6905228	5.61	4.43	6.25	-1.82	0.0002	0.00053
2L	4356876	4358897	10.19	9.01	10.83	-1.83	1.44e-16	1.81e-15
X	15656429	15658022	9.62	8.43	10.26	-1.83	1.34e-15	1.54e-14
3R	5725453	5729111	10.99	9.8	11.63	-1.83	6.36e-14	6.31e-13
2R	7989392	7989896	8.32	7.13	8.96	-1.83	1.29e-12	1.11e-11
2L	15428192	15428930	7.84	6.66	8.48	-1.83	9.46e-11	6.45e-10
2R	14841113	14841920	8.3	7.11	8.94	-1.83	4.3e-10	2.74e-09
X	428023	428323	7.43	6.24	8.07	-1.83	4.56e-09	2.51e-08
X	6739542	6740082	7.03	5.85	7.67	-1.83	4.42e-07	1.85e-06
2L	14204547	14205359	7.82	6.63	8.46	-1.83	1.33e-06	5.16e-06
2R	22737073	22738070	6.66	5.47	7.3	-1.83	1.97e-06	7.44e-06
X	22477893	22478222	5.95	4.77	6.6	-1.83	1.08e-05	3.56e-05
2R	19792049	19794582	12.91	11.71	13.55	-1.84	1.77e-17	2.43e-16
2L	7814323	7815154	9.71	8.51	10.35	-1.84	1.39e-15	1.6e-14
2L	9596888	9598364	8.99	7.79	9.63	-1.84	7.19e-15	7.78e-14
X	6776882	6778703	9.14	7.95	9.79	-1.84	3.66e-13	3.37e-12
2L	17579145	17581798	10.92	9.73	11.56	-1.84	1.6e-12	1.36e-11
3L	16579864	16580262	7.65	6.45	8.29	-1.84	1.38e-10	9.24e-10
2L	5998812	5999337	8.91	7.72	9.55	-1.84	1.65e-10	1.1e-09
2L	3643879	3644179	7.47	6.27	8.11	-1.84	4.74e-06	1.68e-05
3R	31248619	31249182	6.32	5.13	6.97	-1.84	5.12e-06	1.8e-05
2L	12570221	12570521	6.81	5.62	7.46	-1.84	4.89e-05	0.000145
2L	15480316	15482853	11.42	10.22	12.07	-1.85	1.46e-16	1.83e-15
X	8721638	8726321	11.56	10.36	12.21	-1.85	5.66e-13	5.07e-12
X	2088760	2089500	8.65	7.45	9.3	-1.85	2.96e-12	2.45e-11
2L	15733865	15735465	8.94	7.74	9.59	-1.85	8.15e-12	6.35e-11
3R	19107704	19108268	7.74	6.54	8.39	-1.85	1.22e-11	9.32e-11
3R	31701705	31703307	8.16	6.96	8.81	-1.85	1.76e-11	1.31e-10
3R	4408076	4408438	7.14	5.94	7.79	-1.85	2.59e-08	1.3e-07
2L	18521258	18521594	7.07	5.86	7.72	-1.85	2.68e-08	1.34e-07
2R	10675345	10675646	7.04	5.84	7.69	-1.85	6.7e-08	3.13e-07
3R	31956938	31957238	6.84	5.64	7.49	-1.85	3.52e-06	1.28e-05
X	12201670	12201970	6.04	4.84	6.69	-1.85	4.59e-06	1.63e-05
3L	13381419	13381746	5.73	4.52	6.37	-1.85	3.95e-05	0.000119
3L	449659	450014	5.35	4.14	5.99	-1.85	0.00493	0.00988
2L	7635351	7641644	14.03	12.83	14.68	-1.86	5.17e-19	8.44e-18
2R	18600705	18601892	8.17	6.96	8.82	-1.86	1.47e-10	9.82e-10
X	7417852	7418667	8.02	6.81	8.67	-1.86	8.38e-10	5.11e-09
3L	10486252	10486582	6.95	5.74	7.6	-1.86	4.28e-08	2.05e-07
3L	4156499	4156813	7.14	5.92	7.78	-1.86	9.91e-07	3.93e-06
2L	1646306	1647181	11.1	9.88	11.75	-1.87	5.39e-19	8.77e-18
2R	23882874	23883361	9.25	8.03	9.9	-1.87	3.17e-13	2.93e-12
3R	19052073	19052788	8.94	7.72	9.59	-1.87	1.38e-12	1.18e-11
2R	9835581	9836551	8.26	7.04	8.91	-1.87	5.18e-09	2.83e-08
3L	18672131	18672454	7.06	5.84	7.71	-1.87	2.66e-08	1.33e-07
3R	16373422	16373931	6.08	4.85	6.73	-1.87	0.00291	0.00612
3R	25630132	25630512	9.15	7.92	9.8	-1.88	8.12e-14	7.96e-13
3R	8854523	8855763	11.36	10.14	12.02	-1.88	1.15e-12	9.94e-12
3L	18227113	18228827	10.14	8.92	10.8	-1.88	2.53e-12	2.11e-11
4	991581	992194	7.24	6.01	7.89	-1.88	3.46e-08	1.69e-07
3L	8422957	8423612	7.19	5.96	7.84	-1.88	1.95e-07	8.51e-07
2L	11189664	11190436	7.84	6.62	8.49	-1.88	2.52e-07	1.08e-06
Y	1431379	1431679	4.51	3.29	5.16	-1.88	0.00763	0.0146
X	10931704	10932125	5.38	4.16	6.04	-1.88	0.0091	0.0171
X	15690875	15693645	11.42	10.18	12.07	-1.89	3.82e-19	6.28e-18
X	458191	461445	12.52	11.29	13.18	-1.89	2.55e-18	3.86e-17
3L	18234430	18235645	10.96	9.72	11.61	-1.89	1.89e-15	2.15e-14
3R	4340862	4342093	11.43	10.2	12.09	-1.89	3.22e-14	3.27e-13
2R	22250385	22250960	10.44	9.2	11.1	-1.89	8.05e-14	7.9e-13
3R	14800878	14801832	7.97	6.74	8.63	-1.89	7.08e-10	4.36e-09
X	10361581	10362383	7.71	6.48	8.36	-1.89	1.67e-09	9.8e-09
3R	6226124	6226755	6.86	5.63	7.51	-1.89	5.34e-09	2.91e-08
3L	15202663	15203002	6.96	5.73	7.62	-1.89	2.45e-08	1.22e-07
3R	10110762	10111405	6.75	5.51	7.4	-1.89	5.39e-08	2.56e-07
2L	4802267	4802722	6.66	5.43	7.31	-1.89	1.09e-07	4.98e-07
2R	20844628	20845064	6.07	4.83	6.72	-1.89	5.33e-06	1.87e-05
X	14259321	14259650	5.19	3.96	5.85	-1.89	0.000893	0.00209
X	7170859	7171258	5.09	3.85	5.74	-1.89	0.00177	0.0039
3L	16742263	16745380	11.9	10.66	12.56	-1.9	2.32e-16	2.85e-15
2L	9592205	9593540	8.34	7.1	9	-1.9	8.25e-14	8.06e-13
2R	19817938	19818763	11.8	10.55	12.45	-1.9	1.25e-13	1.19e-12
3R	19101987	19103243	8.44	7.2	9.1	-1.9	4.36e-13	3.97e-12
3L	18225579	18225961	9.83	8.58	10.49	-1.9	1.46e-11	1.11e-10
3L	10280963	10282254	9.42	8.18	10.08	-1.9	9.39e-10	5.67e-09
2R	11521932	11522303	7.01	5.77	7.67	-1.9	1.86e-07	8.22e-07
3R	7027567	7028041	6.44	5.2	7.1	-1.9	4.54e-06	1.62e-05
3L	13387988	13389358	6.84	5.6	7.5	-1.9	9.8e-05	0.000276
3L	15079131	15079513	6.49	5.25	7.15	-1.9	9.92e-05	0.000279
3R	17094994	17095473	5.64	4.39	6.3	-1.9	0.000136	0.000371
3L	11428204	11428543	5.05	3.8	5.7	-1.9	0.00277	0.00587
2R	14787428	14789212	12.3	11.04	12.96	-1.91	3.89e-14	3.94e-13
2R	19627913	19629447	9.47	8.21	10.13	-1.91	3.98e-14	4.02e-13
2R	19869506	19871254	9.76	8.51	10.42	-1.91	1.22e-13	1.17e-12
3L	16773144	16773527	8.45	7.19	9.11	-1.91	5.57e-12	4.44e-11
3R	29699097	29699693	8.22	6.97	8.88	-1.91	6.02e-11	4.19e-10
2L	19341362	19341726	8.13	6.88	8.79	-1.91	3.38e-09	1.9e-08
X	4435388	4435983	6.61	5.36	7.27	-1.91	1.59e-07	7.08e-07
3L	8647043	8647417	7.3	6.05	7.96	-1.91	1.79e-07	7.9e-07
2L	1969291	1969866	6.69	5.43	7.35	-1.91	1.65e-06	6.31e-06
3L	12678169	12678469	5.27	4.02	5.93	-1.91	0.00172	0.00381
3L	5354281	5355683	10.57	9.31	11.23	-1.92	4.26e-17	5.56e-16
3L	5880736	5881561	9.71	8.45	10.37	-1.92	2.24e-16	2.77e-15
2R	14433015	14433950	9.79	8.54	10.45	-1.92	1.99e-14	2.06e-13
3R	29219257	29219743	7.48	6.23	8.14	-1.92	1.61e-11	1.21e-10
2L	14422079	14424824	9.22	7.96	9.88	-1.92	1.74e-11	1.3e-10
2R	13179758	13180082	7.94	6.68	8.6	-1.92	8.35e-10	5.1e-09
2R	5686150	5686768	7.45	6.19	8.11	-1.92	1.04e-08	5.44e-08
X	15146940	15147513	6.96	5.7	7.62	-1.92	1.76e-08	8.98e-08
3L	15088117	15088495	6.23	4.98	6.89	-1.92	6.12e-07	2.51e-06
3L	13250155	13250498	8.58	7.31	9.24	-1.93	3.64e-12	2.97e-11
X	462834	464975	9.53	8.26	10.19	-1.93	8.6e-11	5.91e-10
3L	760249	760919	8.03	6.76	8.7	-1.93	5.49e-10	3.45e-09
2R	12463623	12464149	7.36	6.09	8.02	-1.93	1.85e-09	1.07e-08
X	6608876	6609509	7.35	6.08	8.01	-1.93	8.76e-09	4.64e-08
3L	10264684	10265286	6.66	5.39	7.32	-1.93	1.01e-06	3.98e-06
3L	8526939	8527609	7.07	5.8	7.73	-1.93	1.02e-06	4.01e-06
3R	17590599	17591112	5.45	4.19	6.11	-1.93	0.00186	0.00407
3R	21511809	21513637	10.67	9.4	11.34	-1.94	1.46e-16	1.83e-15
2L	5452841	5454122	8.13	6.86	8.8	-1.94	2.28e-12	1.91e-11
2L	15098918	15100201	8.2	6.93	8.87	-1.94	4.93e-12	3.95e-11
2L	14652052	14652393	7.6	6.33	8.27	-1.94	4.82e-08	2.3e-07
2R	9694623	9694935	6.48	5.21	7.15	-1.94	1.12e-05	3.71e-05
3R	22261238	22262634	11.63	10.34	12.29	-1.95	5.49e-20	1e-18
X	18980531	18981387	9.01	7.73	9.68	-1.95	2.88e-13	2.67e-12
3L	18218958	18219325	7.45	6.16	8.12	-1.95	1.14e-12	9.88e-12
3L	12388788	12389442	7.12	5.85	7.79	-1.95	9.01e-10	5.46e-09
2L	12487270	12487660	6.39	5.11	7.06	-1.95	6.24e-06	2.16e-05
3L	14149928	14154375	12.1	10.81	12.77	-1.96	2.41e-21	4.94e-20
2L	1429106	1437154	14.84	13.55	15.51	-1.96	2.76e-20	5.26e-19
3R	10370714	10371656	11.1	9.81	11.77	-1.96	2.6e-17	3.47e-16
2R	17568080	17568461	7.92	6.63	8.59	-1.96	9.12e-12	7.07e-11
3L	2852374	2853212	6.55	5.26	7.22	-1.96	3.67e-07	1.55e-06
3R	30066178	30066724	6.22	4.93	6.89	-1.96	5.12e-05	0.000152
2R	6512943	6513770	8.43	7.13	9.11	-1.97	3.6e-13	3.31e-12
2R	9072311	9073000	8.64	7.34	9.31	-1.97	1.07e-12	9.27e-12
X	3347445	3348279	9.24	7.94	9.91	-1.97	1.24e-11	9.41e-11
3R	13829583	13830384	7.66	6.36	8.33	-1.97	3.12e-11	2.26e-10
X	10893241	10893918	7.23	5.93	7.9	-1.97	2.67e-10	1.75e-09
3R	5027462	5028615	10.65	9.34	11.33	-1.98	1.59e-17	2.19e-16
X	12210659	12211454	8.51	7.21	9.18	-1.98	2.25e-14	2.32e-13
2R	23633981	23634984	9.06	7.76	9.74	-1.98	2.87e-14	2.94e-13
3R	30215583	30217057	8.32	7.02	9	-1.98	5.66e-10	3.54e-09
2R	16601146	16603197	7.73	6.42	8.4	-1.98	1.51e-08	7.78e-08
3R	16840780	16841660	7.07	5.76	7.74	-1.98	7e-07	2.85e-06
X	1593078	1593760	6.58	5.27	7.25	-1.98	2.05e-06	7.73e-06
3L	10759776	10760089	5.92	4.61	6.59	-1.98	1.13e-05	3.74e-05
3R	6829704	6830087	6.4	5.1	7.08	-1.98	2.57e-05	8e-05
X	6610911	6611553	11.72	10.4	12.39	-1.99	2.24e-16	2.77e-15
2R	21712217	21712549	10.35	9.04	11.03	-1.99	9.84e-13	8.58e-12
3L	12681364	12681837	7.48	6.16	8.15	-1.99	9.04e-12	7.02e-11
2L	14517292	14517628	8.1	6.79	8.78	-1.99	7.85e-11	5.41e-10
3L	16482797	16483101	6.88	5.57	7.55	-1.99	1.64e-07	7.27e-07
3L	11431905	11432280	6.67	5.36	7.35	-1.99	1.36e-06	5.27e-06
2L	15386958	15387279	5.78	4.46	6.45	-1.99	2.41e-05	7.53e-05
Y	1447170	1447479	5.65	4.33	6.32	-1.99	7.19e-05	0.000208
2L	7292213	7293573	9.01	7.69	9.69	-2	2.62e-13	2.44e-12
X	252391	253063	7.76	6.44	8.44	-2	7.76e-11	5.36e-10
X	15660909	15662213	9.46	8.13	10.14	-2.01	1.15e-14	1.23e-13
X	16204480	16205185	7.91	6.58	8.58	-2.01	2.02e-14	2.09e-13
2L	18737938	18738635	8	6.68	8.68	-2.01	2.79e-11	2.04e-10
3L	14955982	14956785	8.77	7.43	9.45	-2.01	1.33e-10	8.93e-10
3R	16523633	16524173	6.66	5.32	7.34	-2.01	6.44e-07	2.63e-06
3R	31697354	31698049	6.01	4.68	6.69	-2.01	2.07e-05	6.55e-05
3R	6718254	6718586	5.36	4.03	6.04	-2.01	0.000312	0.000799
3L	7110752	7111167	5.82	4.49	6.5	-2.01	0.000894	0.00209
2R	25097152	25098572	7.9	6.56	8.58	-2.02	4.15e-12	3.37e-11
2L	11061371	11061983	7.18	5.84	7.86	-2.02	1.2e-11	9.21e-11
2R	21529676	21530012	7.06	5.72	7.74	-2.02	3.13e-09	1.77e-08
2R	5670282	5671534	8.22	6.88	8.9	-2.03	1.12e-14	1.19e-13
2R	8321164	8322139	8.54	7.2	9.23	-2.03	1.22e-13	1.17e-12
3L	10684176	10685035	9.62	8.27	10.31	-2.03	3.25e-13	3.01e-12
3L	15260806	15261852	8.22	6.87	8.9	-2.03	7.48e-10	4.59e-09
3L	7011165	7011499	7.46	6.11	8.14	-2.03	1.04e-08	5.46e-08
X	3140547	3141133	6.64	5.29	7.32	-2.03	1.18e-06	4.63e-06
3R	31047701	31048641	6.63	5.28	7.31	-2.03	7.72e-06	2.63e-05
X	11729309	11730284	6.71	5.36	7.39	-2.03	4.82e-05	0.000144
X	3149271	3149954	5.57	4.22	6.25	-2.03	0.000255	0.000665
3L	474629	475254	7.87	6.51	8.56	-2.04	1.11e-12	9.66e-12
2L	5399033	5400379	9.72	8.36	10.4	-2.04	4.86e-12	3.9e-11
X	15674374	15675822	8.09	6.74	8.78	-2.04	3.05e-11	2.21e-10
X	7137441	7139094	8.72	7.37	9.4	-2.04	6.98e-11	4.85e-10
X	22443266	22443595	6.23	4.87	6.91	-2.04	1.96e-07	8.57e-07
3R	4744681	4745033	6.63	5.28	7.32	-2.04	1.03e-05	3.41e-05
3R	7105562	7106287	11.3	9.94	11.98	-2.05	1.09e-19	1.9e-18
3R	16215782	16216202	8.44	7.08	9.12	-2.05	2.94e-16	3.6e-15
X	19805319	19805982	9.19	7.83	9.88	-2.05	3.5e-16	4.25e-15
3R	29309188	29309721	8.87	7.51	9.56	-2.05	4.48e-14	4.51e-13
X	6740232	6740637	7.9	6.53	8.58	-2.05	5.18e-10	3.27e-09
2L	7447473	7448282	8.37	7.01	9.06	-2.05	7.76e-10	4.75e-09
2R	24326539	24327138	8.68	7.32	9.37	-2.05	6.14e-09	3.31e-08
2L	18892816	18893479	7.74	6.38	8.43	-2.06	3.12e-11	2.25e-10
X	16237846	16238645	7.43	6.06	8.12	-2.06	1.71e-10	1.14e-09
2R	12956684	12958631	9.99	8.62	10.68	-2.06	2.89e-10	1.88e-09
3R	30393389	30394066	8.68	7.31	9.37	-2.06	5.82e-10	3.63e-09
3L	15512757	15513456	7.38	6.01	8.07	-2.06	4.73e-07	1.97e-06
X	17094652	17095472	5.25	3.87	5.94	-2.06	0.000618	0.00149
2R	6572293	6574411	10.03	8.65	10.72	-2.07	1.17e-19	2.02e-18
3R	25634459	25636103	9.9	8.52	10.59	-2.07	1.27e-16	1.6e-15
X	393410	395522	9.12	7.74	9.81	-2.07	3.48e-16	4.23e-15
3L	12443092	12443944	7.83	6.45	8.52	-2.07	5.06e-12	4.05e-11
3R	21235388	21236012	8.55	7.17	9.24	-2.07	5.48e-12	4.37e-11
X	7610743	7611062	6.74	5.36	7.43	-2.07	1.51e-06	5.81e-06
3R	19297423	19297783	6.22	4.85	6.92	-2.07	3.22e-06	1.18e-05
2R	15614338	15615759	7.07	5.69	7.76	-2.07	7.06e-06	2.42e-05
3L	2142726	2143241	6.48	5.1	7.18	-2.07	1.09e-05	3.61e-05
2R	24817849	24818176	5.44	4.06	6.13	-2.07	0.000248	0.000648
X	2279138	2279482	6.1	4.73	6.79	-2.07	0.00028	0.000723
3L	14971335	14973737	12.05	10.67	12.75	-2.08	2.13e-17	2.89e-16
2L	13888267	13890522	8.47	7.08	9.16	-2.08	6.93e-16	8.18e-15
2R	13563800	13565291	9.58	8.19	10.28	-2.08	5.35e-14	5.33e-13
X	7115210	7117324	9.45	8.06	10.14	-2.08	1.75e-11	1.31e-10
2R	24999133	24999993	8.25	6.86	8.94	-2.08	9.46e-10	5.71e-09
2L	14214334	14214670	6.5	5.12	7.19	-2.08	4.38e-08	2.1e-07
2R	16093740	16094052	6.57	5.18	7.27	-2.08	4.93e-07	2.05e-06
3R	29689544	29689979	6.14	4.75	6.83	-2.08	3.1e-05	9.51e-05
2L	11953501	11953801	4.83	3.45	5.53	-2.08	0.00252	0.00538
2L	4122842	4124476	8.85	7.46	9.54	-2.09	4.49e-12	3.62e-11
3R	10461272	10462797	7.02	5.63	7.71	-2.09	7.76e-12	6.07e-11
2R	17814662	17815895	7.52	6.12	8.21	-2.09	1.32e-11	1e-10
2L	20865298	20865926	8.05	6.66	8.75	-2.09	4.47e-09	2.46e-08
3L	9042428	9042805	6.31	4.91	7	-2.09	5.57e-07	2.3e-06
2L	5444019	5444512	6.68	5.29	7.38	-2.09	2.58e-06	9.55e-06
2L	20477184	20477514	5.8	4.41	6.49	-2.09	9.65e-06	3.22e-05
3L	14181709	14182009	4.5	3.1	5.19	-2.09	0.00822	0.0157
3L	17361448	17367658	15.59	14.18	16.28	-2.1	2.4e-31	9.48e-30
3L	10330803	10332025	8.87	7.47	9.57	-2.1	6.88e-16	8.15e-15
2R	15860716	15861016	6.7	5.29	7.4	-2.1	1.16e-09	6.93e-09
3L	15252925	15253235	6.57	5.17	7.26	-2.1	9.88e-08	4.54e-07
3L	7775737	7776096	6.56	5.16	7.25	-2.1	3.12e-07	1.34e-06
3L	21701777	21702476	6.68	5.27	7.37	-2.1	1.5e-06	5.76e-06
3L	14573978	14577240	12.46	11.05	13.16	-2.11	5.57e-19	9e-18
3L	413528	416313	10.67	9.26	11.37	-2.11	1.9e-17	2.59e-16
2L	21814494	21814873	8.91	7.5	9.61	-2.11	5.98e-16	7.15e-15
X	2387454	2388592	8.84	7.43	9.54	-2.11	1.54e-15	1.77e-14
X	17513286	17514344	8.29	6.88	8.99	-2.11	4.9e-11	3.44e-10
X	7161081	7162259	8.14	6.73	8.84	-2.11	1.12e-09	6.69e-09
2R	25232062	25232724	7.22	5.81	7.92	-2.11	4.79e-06	1.69e-05
3L	2157633	2158304	5.96	4.55	6.66	-2.11	5.92e-06	2.06e-05
3L	3665517	3665881	6.34	4.93	7.04	-2.11	1.96e-05	6.25e-05
3R	8331802	8332602	6.81	5.39	7.52	-2.12	3.62e-08	1.76e-07
3R	19335605	19336595	6.92	5.5	7.62	-2.12	6.44e-06	2.22e-05
3R	30827507	30827807	5.38	3.96	6.08	-2.12	0.000285	0.000736
2L	7005445	7010144	11.94	10.51	12.64	-2.13	3.78e-20	7.02e-19
3R	30851120	30852583	9.05	7.63	9.75	-2.13	5.03e-17	6.52e-16
2L	21014068	21014507	8.56	7.13	9.26	-2.13	1.5e-12	1.28e-11
3L	12082892	12083331	7.89	6.46	8.59	-2.13	6.69e-10	4.15e-09
X	7111256	7111804	6.63	5.2	7.33	-2.13	2.01e-09	1.16e-08
3R	11658905	11659237	7.24	5.81	7.94	-2.13	6.07e-09	3.28e-08
3L	5665955	5666255	6.8	5.37	7.5	-2.13	9.53e-09	5.03e-08
3R	28911520	28911925	6.79	5.36	7.5	-2.13	3.54e-07	1.5e-06
3L	13520025	13520351	6.21	4.78	6.91	-2.13	3.5e-05	0.000107
2L	11964792	11965092	4.69	3.27	5.39	-2.13	0.00267	0.00566
3R	29291903	29295837	11.73	10.29	12.43	-2.14	1.62e-21	3.34e-20
3R	21597057	21598309	10.29	8.86	11	-2.14	3.78e-21	7.67e-20
X	4415222	4416292	9.13	7.69	9.84	-2.14	7.45e-20	1.34e-18
3R	6952445	6954914	11.09	9.66	11.8	-2.14	7.54e-20	1.35e-18
3R	14748941	14749695	8.3	6.86	9	-2.14	1.31e-12	1.13e-11
2R	24825275	24825710	6.71	5.28	7.42	-2.14	1.84e-09	1.06e-08
3R	21518488	21519454	7.22	5.79	7.93	-2.14	4.69e-08	2.24e-07
3R	17667744	17668304	6.94	5.51	7.65	-2.14	3.97e-06	1.43e-05
X	8271340	8272031	10.67	9.23	11.38	-2.15	1.92e-19	3.26e-18
2R	21705745	21707582	10.27	8.83	10.98	-2.15	5.07e-14	5.06e-13
3R	20776207	20777166	7.25	5.81	7.96	-2.15	7.05e-13	6.27e-12
2R	21102172	21102488	7.77	6.32	8.47	-2.15	1.95e-12	1.65e-11
2L	13891401	13891724	6.89	5.45	7.6	-2.15	5.7e-09	3.08e-08
X	17187202	17187544	6.37	4.92	7.07	-2.15	4.04e-08	1.94e-07
3R	17596158	17596993	5.87	4.43	6.58	-2.15	1.88e-06	7.13e-06
2L	707782	708898	9.24	7.78	9.94	-2.16	1.52e-18	2.36e-17
2L	4255649	4255983	7.96	6.51	8.67	-2.16	7.51e-11	5.2e-10
X	4456416	4456855	6.61	5.16	7.32	-2.16	3.76e-08	1.82e-07
3L	20628684	20629083	5.61	4.15	6.32	-2.16	8.57e-05	0.000245
2L	13863629	13864968	8.79	7.33	9.5	-2.17	1.87e-18	2.87e-17
2L	5429086	5429674	5.5	4.04	6.21	-2.17	1.89e-05	6.03e-05
2R	17829372	17830442	9.36	7.89	10.07	-2.18	7.68e-21	1.51e-19
2R	17341406	17342973	12.22	10.76	12.93	-2.18	1.07e-18	1.68e-17
3R	24891901	24892739	8.7	7.23	9.41	-2.18	3.88e-16	4.67e-15
3R	8214538	8215282	6.34	4.88	7.05	-2.18	1.35e-07	6.07e-07
2L	2470526	2470893	6.48	5.01	7.19	-2.18	7.07e-07	2.87e-06
3L	18848626	18854459	16.49	15.02	17.2	-2.19	1.31e-42	9.39e-41
2L	14452786	14454589	10.13	8.65	10.84	-2.19	2.75e-17	3.65e-16
2R	10486217	10486803	9.84	8.35	10.55	-2.2	3.41e-19	5.63e-18
3R	30857288	30862166	11.23	9.75	11.95	-2.2	3.12e-17	4.12e-16
3R	18041882	18042223	7.21	5.72	7.92	-2.2	2.85e-08	1.41e-07
3R	31696330	31696767	5.45	3.96	6.16	-2.2	2.6e-05	8.08e-05
2L	2469470	2470334	6.02	4.54	6.74	-2.2	3.2e-05	9.8e-05
X	16849954	16850254	4.99	3.51	5.7	-2.2	0.000573	0.00139
3R	31683053	31684264	11.05	9.56	11.77	-2.21	1.62e-24	4.05e-23
3R	30873981	30874903	6.99	5.5	7.71	-2.21	1.1e-11	8.49e-11
X	4568964	4570144	6.88	5.39	7.6	-2.21	7.18e-10	4.41e-09
3R	27215293	27215593	5.3	3.81	6.02	-2.21	8.73e-05	0.000249
3L	15705086	15706992	11.01	9.51	11.73	-2.22	1.28e-26	3.78e-25
3L	6244975	6245674	7.99	6.49	8.71	-2.22	7.6e-14	7.47e-13
3R	13650596	13650907	8.79	7.29	9.51	-2.22	1.24e-13	1.19e-12
2L	18522273	18523064	7.1	5.6	7.82	-2.22	3.07e-09	1.73e-08
2L	13943536	13944143	7.16	5.67	7.88	-2.22	7.85e-08	3.64e-07
3R	11475541	11475901	5.81	4.31	6.52	-2.22	0.002	0.00436
2L	9595406	9596630	8.88	7.38	9.6	-2.23	9.75e-19	1.54e-17
3R	17561389	17563032	8.26	6.74	8.98	-2.23	4.15e-17	5.43e-16
3R	22262738	22263133	8.17	6.66	8.89	-2.23	7.35e-12	5.78e-11
2R	22400811	22401270	7.24	5.73	7.96	-2.23	9.81e-12	7.6e-11
2R	11576903	11577298	7.04	5.53	7.77	-2.23	9.36e-10	5.65e-09
2L	19097672	19098284	6.57	5.06	7.29	-2.23	3.77e-09	2.09e-08
X	6727018	6727428	7.17	5.66	7.89	-2.23	3.98e-09	2.21e-08
3L	7114014	7115624	7.14	5.63	7.86	-2.23	1.16e-07	5.29e-07
3L	14967980	14968801	8.15	6.63	8.88	-2.24	7.39e-14	7.29e-13
3R	19276033	19276369	6.93	5.41	7.65	-2.24	1.03e-11	7.92e-11
3L	27887480	27888311	8.11	6.59	8.83	-2.24	2.92e-11	2.13e-10
3L	11546453	11546983	8.01	6.49	8.73	-2.24	4.42e-11	3.12e-10
2R	17261651	17262165	9.5	7.97	10.22	-2.25	1.89e-18	2.89e-17
X	15663473	15663886	5.78	4.25	6.5	-2.25	4.65e-06	1.65e-05
2R	21363300	21363600	5.52	3.99	6.24	-2.25	8.43e-06	2.85e-05
2L	18745232	18745569	5.62	4.09	6.34	-2.25	0.000142	0.000388
3R	19069245	19069680	8.96	7.43	9.69	-2.26	2.94e-19	4.92e-18
X	17736543	17738504	9.7	8.16	10.43	-2.26	2.38e-18	3.61e-17
3L	3383796	3384283	8.11	6.58	8.84	-2.26	1.16e-16	1.47e-15
2L	19907070	19907460	7.88	6.35	8.61	-2.26	1.05e-15	1.22e-14
2R	22861817	22862445	8.76	7.22	9.49	-2.26	1.59e-13	1.51e-12
3R	11999286	11999770	5.39	3.86	6.12	-2.26	0.00239	0.00514
3L	15257017	15257980	8.35	6.81	9.07	-2.27	1.19e-18	1.85e-17
X	19295861	19296214	8.71	7.16	9.43	-2.27	5.61e-15	6.12e-14
X	10883008	10883446	6.04	4.5	6.77	-2.27	1.18e-07	5.39e-07
3R	10111591	10111929	6.41	4.87	7.14	-2.27	4e-07	1.69e-06
3L	734042	734552	6.05	4.5	6.78	-2.27	6.31e-07	2.58e-06
3R	8187183	8188352	7.18	5.64	7.91	-2.27	1.23e-06	4.79e-06
3R	4348453	4348958	5.57	4.03	6.3	-2.27	8.12e-05	0.000233
3L	14801293	14801593	4.5	2.96	5.23	-2.27	0.00496	0.00994
2L	2162945	2164007	10.22	8.67	10.95	-2.28	9.45e-22	1.99e-20
2L	7488446	7489073	6.85	5.29	7.58	-2.28	3.66e-11	2.62e-10
3L	10229594	10230644	7.94	6.39	8.67	-2.28	7.75e-10	4.75e-09
X	17683653	17683986	6.53	4.98	7.26	-2.28	6.6e-09	3.54e-08
X	3144061	3144516	5.85	4.3	6.58	-2.28	2.79e-07	1.19e-06
2L	1320006	1320400	5.75	4.2	6.48	-2.28	0.00131	0.00298
2L	2182991	2184000	8.46	6.9	9.19	-2.29	1.05e-19	1.84e-18
3R	29539867	29542679	11.93	10.38	12.66	-2.29	1.52e-19	2.61e-18
3L	4080979	4082389	8.16	6.6	8.89	-2.29	2.18e-15	2.47e-14
3L	15470688	15472027	11.63	10.07	12.37	-2.29	5.06e-14	5.06e-13
2L	5456878	5457538	5.77	4.21	6.5	-2.29	4.59e-05	0.000137
2R	6590058	6595896	15.41	13.85	16.15	-2.3	2.83e-40	1.91e-38
3L	1096665	1098218	8.28	6.71	9.02	-2.3	5.69e-12	4.52e-11
X	5997308	5998086	7.34	5.77	8.07	-2.3	1.88e-09	1.09e-08
3R	22635720	22636203	6.05	4.49	6.78	-2.3	7.78e-05	0.000223
2R	8043184	8043506	5.44	3.87	6.18	-2.3	0.000364	0.000916
3L	7003166	7003541	5.35	3.79	6.08	-2.3	0.00304	0.00637
3L	732935	733875	10.17	8.59	10.9	-2.31	1.13e-20	2.19e-19
3R	18079171	18079550	5.5	3.92	6.24	-2.31	6.65e-05	0.000193
2R	20887309	20889534	8.78	7.2	9.52	-2.32	2.04e-14	2.11e-13
X	7000632	7001327	7.78	6.2	8.52	-2.32	2.93e-11	2.13e-10
3L	12271793	12272145	6.39	4.81	7.12	-2.32	8.23e-09	4.36e-08
2R	18657419	18657726	5.99	4.41	6.73	-2.32	9.4e-08	4.32e-07
X	2511329	2511629	5.85	4.26	6.58	-2.32	1.65e-06	6.32e-06
3L	1444364	1444912	6.66	5.07	7.39	-2.33	9.83e-08	4.52e-07
3R	23325976	23326276	5.73	4.13	6.46	-2.33	1.46e-05	4.75e-05
2R	21543857	21546600	12.04	10.44	12.78	-2.34	3.31e-24	8.08e-23
2L	18766623	18768710	8.19	6.59	8.93	-2.34	2.58e-15	2.9e-14
2L	3819398	3820083	6.64	5.04	7.38	-2.34	8.85e-11	6.06e-10
X	6727840	6728741	6.94	5.34	7.68	-2.34	1.92e-06	7.26e-06
2L	6703831	6705075	7.47	5.86	8.21	-2.35	1.75e-15	2e-14
X	2511803	2512369	6.42	4.81	7.16	-2.35	6.3e-08	2.96e-07
X	13309925	13310255	5.83	4.22	6.57	-2.35	6.36e-07	2.6e-06
X	455795	457683	12.48	10.87	13.23	-2.36	2.03e-28	6.66e-27
3R	17549717	17552425	12.68	11.06	13.42	-2.36	1.44e-24	3.63e-23
3R	16802740	16805950	9.86	8.24	10.6	-2.36	3.37e-20	6.31e-19
3L	4684402	4685821	7.89	6.28	8.64	-2.36	1.79e-17	2.46e-16
3L	12558216	12559068	8.05	6.43	8.8	-2.36	8.94e-14	8.72e-13
2R	11573435	11574061	6.86	5.23	7.6	-2.37	4.24e-11	3e-10
X	5700693	5702696	8.14	6.52	8.89	-2.37	6.99e-11	4.85e-10
X	4457923	4458995	8.63	7	9.37	-2.38	9.32e-14	9.06e-13
3R	16809020	16809888	9.35	7.71	10.09	-2.39	1.25e-23	2.98e-22
2L	12344001	12344365	7.13	5.48	7.87	-2.39	8.48e-15	9.1e-14
2L	16886640	16886940	5.66	4.02	6.41	-2.39	1.97e-06	7.44e-06
3R	21640793	21641937	9.55	7.91	10.3	-2.4	5.55e-18	8.06e-17
3L	1914099	1914453	7.05	5.4	7.8	-2.4	7.31e-13	6.47e-12
3L	10311776	10312249	6.23	4.58	6.98	-2.4	1.65e-05	5.29e-05
3R	15643354	15644692	8.49	6.83	9.24	-2.41	3.34e-19	5.55e-18
3R	14583398	14583746	7.17	5.51	7.92	-2.41	2.68e-15	3.01e-14
3L	15076305	15076754	6.71	5.05	7.47	-2.41	8.54e-12	6.65e-11
3R	6240154	6240819	6.82	5.16	7.57	-2.41	1.2e-08	6.25e-08
3L	17935013	17935425	5.92	4.26	6.67	-2.41	4.79e-06	1.7e-05
2L	15479077	15480004	9.67	8	10.43	-2.42	9.05e-22	1.91e-20
3L	612823	613433	7.25	5.59	8.01	-2.42	5.49e-11	3.83e-10
2L	21272881	21273181	4.96	3.29	5.71	-2.42	0.000893	0.00209
3R	16923630	16925001	11.56	9.88	12.32	-2.43	3.38e-26	9.67e-25
2L	4368422	4371260	10.9	9.22	11.65	-2.43	1.6e-24	4.01e-23
3L	18232442	18233858	7.91	6.24	8.67	-2.43	5.75e-15	6.27e-14
3L	899294	899894	9.8	8.12	10.55	-2.43	1.36e-13	1.29e-12
2L	8990405	8990855	6.72	5.04	7.47	-2.43	1.52e-07	6.81e-07
3R	10113170	10113903	9.09	7.41	9.84	-2.44	5.41e-21	1.08e-19
2R	17601801	17602170	6.95	5.26	7.7	-2.44	2.91e-08	1.44e-07
2R	11500927	11501741	6.29	4.61	7.05	-2.44	3.24e-08	1.59e-07
2R	21358083	21358796	6.11	4.43	6.87	-2.44	5.69e-05	0.000167
2R	20845943	20846319	11.41	9.72	12.17	-2.45	4.77e-28	1.52e-26
2R	11706619	11709150	10.45	8.76	11.21	-2.45	3.57e-24	8.7e-23
2R	8021993	8022307	8.25	6.56	9.01	-2.45	3.98e-14	4.02e-13
2R	25090972	25091393	7.14	5.45	7.9	-2.45	2.01e-12	1.69e-11
3R	13217448	13218789	8.22	6.52	8.98	-2.46	1.01e-21	2.11e-20
2R	12924280	12924862	9.55	7.85	10.31	-2.46	4.57e-19	7.47e-18
X	2068302	2068741	5.69	3.98	6.45	-2.47	8.27e-07	3.33e-06
2R	11469052	11469458	5.95	4.25	6.71	-2.47	3.82e-06	1.38e-05
3R	31690378	31691376	9.57	7.85	10.33	-2.48	3.52e-18	5.26e-17
2L	8870936	8872303	10.43	8.7	11.19	-2.48	2.79e-15	3.12e-14
X	1589973	1592956	9.3	7.58	10.06	-2.48	3.44e-15	3.81e-14
2L	13802426	13803135	8.19	6.47	8.95	-2.48	6e-15	6.52e-14
X	15655407	15656284	7.36	5.65	8.13	-2.48	9.02e-12	7.01e-11
3R	16790557	16790929	6.43	4.71	7.19	-2.48	1.28e-10	8.63e-10
2L	15310308	15311100	6.41	4.69	7.17	-2.48	1.52e-09	8.92e-09
2L	15501201	15501813	7.42	5.69	8.18	-2.49	8.63e-15	9.23e-14
2L	9576124	9579234	13.18	11.45	13.95	-2.5	3.33e-31	1.29e-29
2L	15478210	15478966	11.17	9.43	11.93	-2.5	2.16e-23	5.08e-22
3R	14090923	14091422	6.37	4.63	7.13	-2.5	1.79e-06	6.83e-06
2L	14236681	14237177	6.39	4.64	7.15	-2.51	1.75e-09	1.02e-08
3R	30032017	30032585	6.94	5.19	7.71	-2.51	4.27e-08	2.05e-07
X	3842872	3845209	9.53	7.78	10.3	-2.52	4.42e-20	8.16e-19
3L	12544934	12545490	7.47	5.72	8.24	-2.52	6.48e-16	7.7e-15
3L	10296555	10298603	13.09	11.32	13.86	-2.53	2.76e-25	7.42e-24
3R	29582693	29584314	9.19	7.43	9.96	-2.53	9.13e-25	2.37e-23
X	6003810	6005040	7.81	6.05	8.58	-2.53	8.12e-18	1.16e-16
X	4576563	4576930	5.66	3.91	6.43	-2.53	1.95e-07	8.51e-07
X	8665919	8666617	6.32	4.55	7.09	-2.54	1.07e-10	7.28e-10
3R	24014373	24017062	10.36	8.58	11.14	-2.55	6.7e-30	2.41e-28
2L	1962229	1963562	7.46	5.69	8.24	-2.55	1.15e-15	1.34e-14
3R	26002130	26003396	11.27	9.49	12.05	-2.56	3.82e-24	9.27e-23
2R	11594651	11595385	8.82	7.04	9.6	-2.56	2.93e-22	6.37e-21
2R	11483598	11484819	9.55	7.76	10.32	-2.56	5.65e-18	8.18e-17
2L	5378389	5378996	7.28	5.49	8.05	-2.56	3.68e-14	3.73e-13
3L	17760110	17760502	6.98	5.2	7.76	-2.56	3.09e-12	2.54e-11
2L	5379263	5379854	6.24	4.45	7.02	-2.56	8.9e-09	4.71e-08
2R	11796374	11796823	7.93	6.14	8.71	-2.57	5.6e-13	5.02e-12
2L	7320420	7320942	5.84	4.04	6.61	-2.57	4.39e-06	1.57e-05
3R	21824256	21825762	9.44	7.64	10.22	-2.58	1.73e-27	5.4e-26
3R	13988456	13990380	9.57	7.77	10.35	-2.58	1.03e-25	2.82e-24
X	18533521	18533861	8.04	6.24	8.82	-2.58	1.02e-16	1.29e-15
3L	3249305	3249613	6.18	4.38	6.95	-2.58	4.1e-07	1.73e-06
X	7154636	7156579	10.7	8.89	11.48	-2.59	1.9e-36	1.01e-34
3L	17375230	17377315	10.48	8.66	11.26	-2.6	5.66e-19	9.13e-18
3L	15221214	15221594	7.16	5.34	7.94	-2.6	6.9e-14	6.83e-13
3L	10953842	10954218	7.34	5.52	8.12	-2.6	5.54e-13	4.98e-12
3L	19305700	19306066	5.5	3.68	6.28	-2.6	3.38e-06	1.23e-05
3R	29512484	29512784	5.5	3.68	6.28	-2.6	3.63e-05	0.00011
2R	18787270	18787707	6.45	4.62	7.23	-2.61	9.78e-13	8.55e-12
2L	4806520	4807133	6.32	4.49	7.1	-2.61	2.64e-09	1.51e-08
2R	15649178	15649478	4.91	3.08	5.7	-2.61	7.23e-05	0.000208
3R	9034302	9036164	11.66	9.82	12.44	-2.62	4.19e-31	1.61e-29
[truncated: 218 more rows]

## Sheet: 5-6
Chr	Start	End	Conc	Conc_56	Conc_74	Fold	p-value	FDR
3L	15054907	15055278	7.26	8.26	-0.62	8.88	8.78e-53	1.15e-50
X	14786857	14787171	8.99	9.99	2	7.99	7.71e-105	1.36e-101
2L	10020769	10021381	9.5	10.49	2.66	7.83	5.23e-152	3.7e-148
2R	14717299	14717810	9.04	10.03	2.37	7.66	1.51e-128	3.57e-125
2L	9778461	9779026	10.48	11.47	3.95	7.52	5.53e-144	1.96e-140
3R	23179655	23180186	8.41	9.4	2.2	7.2	2e-72	1.09e-69
3L	17410196	17410621	6.79	7.78	0.71	7.06	1.1e-50	1.28e-48
3L	12466419	12466986	10	10.98	3.98	7	5.59e-13	5.02e-12
3R	32047021	32047541	9.39	10.37	3.63	6.74	1.86e-68	7.32e-66
2R	8267197	8267550	7.41	8.39	1.73	6.66	3.17e-53	4.32e-51
X	17941493	17942105	8.1	9.09	2.49	6.6	4.66e-72	2.36e-69
3L	15055498	15056241	7.82	8.8	2.25	6.55	2.29e-64	8.52e-62
3R	23532158	23532513	6.64	7.62	1.1	6.53	1.14e-36	6.11e-35
3L	3934789	3935127	7.92	8.91	2.46	6.45	2.14e-17	2.89e-16
3L	13973466	13973920	9.44	10.42	4.05	6.37	5.57e-10	3.49e-09
X	14761490	14761909	8.54	9.52	3.22	6.31	1.76e-49	1.91e-47
3R	27501917	27502839	9.2	10.18	3.88	6.3	1.23e-82	8.71e-80
3L	20440534	20440834	5.89	6.88	0.63	6.24	2.03e-24	5.05e-23
2L	9230355	9230687	7.38	8.36	2.17	6.2	7.95e-53	1.06e-50
3L	7899290	7899654	9.03	10.01	3.96	6.05	5.7e-92	5.76e-89
X	15501158	15501730	9.3	10.28	4.25	6.02	3.11e-14	3.16e-13
2L	16837564	16838774	9.72	10.7	4.69	6.01	2.56e-62	7.87e-60
X	16573276	16575036	8.87	9.85	3.84	6	3.18e-64	1.13e-61
X	6116304	6116964	7.82	8.8	2.83	5.97	1.22e-42	8.82e-41
2L	171387	172040	8.4	9.37	3.46	5.92	9.33e-48	8.81e-46
3L	12467273	12467875	8.15	9.13	3.21	5.92	1.95e-43	1.47e-41
X	7744196	7744961	7.38	8.36	2.47	5.88	4.71e-42	3.34e-40
2L	7240475	7240813	7.52	8.49	2.79	5.7	4.23e-43	3.09e-41
X	15307404	15308073	9.31	10.28	4.72	5.56	9.62e-79	6.19e-76
2L	1327638	1328448	8.95	9.92	4.38	5.54	3.42e-59	6.74e-57
3L	4517441	4518487	8.27	9.24	3.72	5.53	1.3e-58	2.35e-56
X	19839593	19840228	7.14	8.11	2.6	5.51	3.45e-39	2.08e-37
X	15489908	15490606	7.12	8.09	2.59	5.5	1.68e-43	1.28e-41
2L	5673622	5674598	8.02	8.99	3.49	5.5	1.92e-37	1.05e-35
2R	23795897	23796228	6.6	7.57	2.09	5.48	5.47e-27	1.64e-25
2L	5876412	5877490	8.3	9.27	3.79	5.48	4.88e-14	4.9e-13
2L	81194	83352	9.89	10.86	5.39	5.47	3.45e-56	5.43e-54
3R	23224263	23224685	9.18	10.15	4.68	5.47	3.42e-55	5.16e-53
X	9034683	9035073	6.56	7.53	2.08	5.45	1.09e-20	2.11e-19
X	11732287	11732589	5.13	6.09	0.65	5.44	7.36e-12	5.78e-11
X	16076400	16079388	9.9	10.87	5.5	5.37	9.43e-57	1.55e-54
2R	19659487	19660740	8.13	9.09	3.87	5.22	2.14e-61	5.84e-59
2L	9186340	9186640	7.01	7.97	2.75	5.22	2.36e-30	8.84e-29
3L	11156768	11157468	7.91	8.87	3.65	5.22	3.92e-07	1.65e-06
2R	17100313	17102776	11.59	12.55	7.35	5.2	4.12e-83	3.24e-80
X	20794899	20795359	8.93	9.89	4.69	5.2	1.97e-56	3.17e-54
3R	8090442	8090744	7.55	8.51	3.33	5.18	8.53e-48	8.16e-46
3L	19496891	19497493	9.16	10.12	4.96	5.16	2.11e-62	6.8e-60
X	3236621	3238197	8.26	9.22	4.06	5.16	5.48e-41	3.8e-39
3R	28039745	28040045	5.22	6.18	1.02	5.16	5.07e-15	5.56e-14
X	13570725	13571540	6.73	7.69	2.54	5.15	2.71e-30	1.01e-28
3R	9264766	9265149	9.12	10.08	4.93	5.15	7.06e-06	2.42e-05
2L	13295382	13295916	9.61	10.57	5.44	5.13	1.49e-61	4.21e-59
3L	15848876	15850415	7.72	8.67	3.56	5.12	1.59e-60	3.8e-58
3L	17471177	17472152	9.96	10.92	5.81	5.11	8.75e-59	1.63e-56
3L	14817162	14817480	6.1	7.06	1.96	5.09	5.75e-17	7.44e-16
3L	16906965	16907742	9.09	10.05	5	5.05	3.32e-44	2.61e-42
X	16571126	16571786	9.2	10.16	5.13	5.02	8.74e-51	1.03e-48
3L	22737111	22737455	8.46	9.42	4.41	5.01	6.35e-52	7.89e-50
3L	4522035	4522369	9.24	10.2	5.19	5.01	4.88e-36	2.5e-34
X	3893601	3894261	7.85	8.81	3.83	4.98	2.82e-36	1.46e-34
3L	6252349	6253347	9.18	10.13	5.19	4.94	3.4e-41	2.38e-39
X	22962900	22964261	9.04	10	5.05	4.94	4.02e-09	2.23e-08
3L	6253763	6254416	8.65	9.6	4.7	4.91	3.47e-39	2.08e-37
X	21182389	21183691	7.76	8.71	3.8	4.91	2.71e-10	1.77e-09
3L	11054874	11056770	9.3	10.25	5.36	4.89	4.45e-08	2.13e-07
2R	21373780	21374428	6.4	7.35	2.48	4.87	2.33e-28	7.56e-27
X	5801223	5801606	5.25	6.2	1.34	4.86	1.77e-15	2.02e-14
3R	16981165	16981894	9.94	10.89	6.07	4.82	5.16e-64	1.74e-61
X	12772674	12773088	5.34	6.29	1.5	4.79	5.88e-18	8.46e-17
X	12498610	12499192	7.37	8.32	3.54	4.78	4.99e-09	2.73e-08
3L	15549146	15549542	9.47	10.41	5.66	4.76	2.56e-36	1.33e-34
3R	10423693	10424406	8.96	9.9	5.15	4.75	3.17e-33	1.43e-31
3R	9448339	9449095	7.99	8.94	4.19	4.75	5.98e-10	3.73e-09
2L	7942271	7942571	8.25	9.2	4.46	4.74	2.56e-40	1.74e-38
2L	6748382	6749223	8.51	9.46	4.72	4.74	1.36e-06	5.26e-06
3R	9544073	9544708	7.62	8.57	3.84	4.73	1.36e-32	5.91e-31
X	12889200	12889905	8.99	9.94	5.22	4.72	2.69e-48	2.77e-46
3L	19338289	19338939	8.98	9.93	5.24	4.69	4.24e-38	2.38e-36
2L	13735590	13736070	6.25	7.19	2.5	4.69	9.89e-21	1.92e-19
X	4353158	4353462	5.2	6.14	1.46	4.68	2.74e-13	2.55e-12
2R	17272678	17273048	9.5	10.44	5.77	4.68	8.15e-07	3.28e-06
2R	22538233	22539052	10.2	11.14	6.47	4.67	2.8e-59	5.67e-57
3R	22992995	22993297	6.83	7.78	3.11	4.66	1.51e-34	7.39e-33
X	10101325	10101973	6.44	7.39	2.73	4.66	4.73e-27	1.43e-25
3R	26767796	26768146	5.49	6.43	1.77	4.66	6.82e-12	5.38e-11
2L	17391985	17392357	8.6	9.54	4.9	4.64	1.63e-43	1.26e-41
3R	12590411	12590871	6.79	7.73	3.12	4.61	7.66e-35	3.77e-33
X	9897348	9899527	9.71	10.65	6.05	4.6	8.74e-57	1.47e-54
X	12498055	12498392	6.65	7.59	2.99	4.6	7.72e-36	3.9e-34
3R	27068554	27068957	9.72	10.66	6.08	4.59	5.31e-59	1.02e-56
2L	10020299	10020623	5.32	6.27	1.68	4.59	2.76e-17	3.66e-16
3R	10625022	10625787	9.39	10.33	5.76	4.57	4.79e-70	2.12e-67
3L	17625017	17625920	9.64	10.58	6.01	4.57	7.8e-11	5.38e-10
3L	16322179	16322621	7.16	8.1	3.54	4.55	1.71e-25	4.66e-24
2L	9081100	9081400	5.87	6.81	2.26	4.55	1.72e-17	2.36e-16
X	17927481	17928108	5.95	6.88	2.33	4.55	1.18e-11	9.07e-11
X	351380	352362	9.35	10.29	5.74	4.54	1.32e-46	1.18e-44
2L	6749393	6750406	7.6	8.54	4.01	4.53	1.2e-49	1.33e-47
X	11916648	11917277	9.06	10	5.48	4.53	6.65e-38	3.71e-36
3R	13599632	13600049	8.06	9	4.47	4.53	4.82e-32	2.01e-30
2R	13015084	13015567	10.24	11.18	6.65	4.52	1.05e-44	8.58e-43
2L	7678396	7678948	8.1	9.04	4.52	4.51	1.75e-09	1.02e-08
3L	18044577	18045208	6.8	7.74	3.25	4.5	1.3e-31	5.24e-30
3R	27986278	27987236	8.34	9.28	4.82	4.46	4.11e-33	1.84e-31
3R	19620490	19621436	8.75	9.68	5.25	4.44	4.82e-40	3.19e-38
2R	23794137	23794880	8.77	9.7	5.26	4.44	3.57e-08	1.74e-07
X	17938829	17939305	7.46	8.39	3.97	4.42	2.21e-19	3.72e-18
3R	14054554	14055055	9.64	10.58	6.17	4.41	7.16e-54	9.94e-52
2L	17389426	17390017	8.54	9.48	5.06	4.41	4.35e-34	2.08e-32
3L	17003699	17005487	9.6	10.54	6.14	4.4	1.32e-47	1.23e-45
3R	15123469	15124029	8.09	9.03	4.63	4.39	1.04e-43	8.07e-42
2R	10212010	10212859	7.46	8.4	4.01	4.39	2.44e-30	9.08e-29
3L	22793154	22794281	8.07	9	4.62	4.39	1.2e-29	4.18e-28
2L	12735844	12736293	6.3	7.23	2.85	4.39	1.32e-15	1.52e-14
3L	2745400	2745852	8.29	9.23	4.85	4.38	4.32e-45	3.6e-43
3R	13598964	13599264	6.17	7.11	2.73	4.38	1.86e-12	1.57e-11
X	23089570	23089913	7.67	8.6	4.24	4.37	8.15e-29	2.73e-27
X	18834757	18835564	8.18	9.11	4.78	4.34	6.79e-54	9.61e-52
3R	23175930	23176677	8.55	9.48	5.15	4.33	6.96e-29	2.36e-27
2L	14636021	14637290	9.8	10.73	6.41	4.32	1.16e-31	4.68e-30
3R	11972550	11973235	6.74	7.67	3.35	4.32	2.98e-20	5.63e-19
3L	18030175	18030939	6.06	6.99	2.66	4.32	1.63e-19	2.77e-18
X	7401974	7402379	6.4	7.33	3.01	4.32	6.25e-13	5.59e-12
2L	10753689	10754873	9.13	10.06	5.76	4.31	1.27e-57	2.19e-55
X	10397106	10398245	8.94	9.87	5.57	4.31	1.12e-29	3.96e-28
X	18832764	18833569	8.19	9.12	4.81	4.3	9.14e-06	3.07e-05
2R	21282639	21282965	6.63	7.56	3.27	4.29	0.000223	0.000588
X	17292881	17294800	8.37	9.3	5.02	4.28	1.47e-59	3.15e-57
2L	18625711	18626293	10.9	11.83	7.56	4.27	8.64e-61	2.19e-58
3R	31970796	31972114	8.25	9.17	4.91	4.26	4.93e-32	2.04e-30
X	8198881	8199451	5.82	6.74	2.48	4.26	8.02e-21	1.57e-19
X	178793	179417	6.34	7.26	3.02	4.25	4.07e-14	4.1e-13
2R	14031100	14031899	7.78	8.7	4.46	4.24	1.04e-39	6.58e-38
3R	23229164	23229499	7.7	8.63	4.39	4.24	4.64e-30	1.68e-28
X	16907356	16907666	7.83	8.75	4.52	4.24	6.05e-05	0.000177
3R	24289189	24289489	7.88	8.81	4.57	4.23	8.63e-34	3.99e-32
X	3360344	3360701	7.62	8.54	4.34	4.21	5.6e-40	3.64e-38
3L	22614206	22614912	7.63	8.56	4.34	4.21	2.5e-20	4.78e-19
X	16921399	16923426	10.06	10.99	6.77	4.21	8.6e-09	4.56e-08
X	6625035	6626316	9.34	10.26	6.06	4.2	2.88e-60	6.36e-58
2R	12724550	12726019	8.96	9.89	5.69	4.19	2.89e-50	3.25e-48
3L	17614651	17616066	8.27	9.2	5.01	4.19	7.01e-32	2.85e-30
4	905919	906219	7.42	8.34	4.16	4.19	3.88e-20	7.17e-19
X	23088744	23089465	9.51	10.44	6.26	4.18	1.61e-60	3.8e-58
X	12508108	12508481	7.18	8.1	3.92	4.18	2.37e-20	4.55e-19
3L	8913958	8914402	7.04	7.96	3.79	4.17	3.64e-26	1.04e-24
X	23090106	23090406	7.34	8.26	4.1	4.16	4.81e-23	1.11e-21
3L	12822224	12822781	7.24	8.16	4	4.16	0.00103	0.00239
X	2102505	2102893	8.59	9.51	5.37	4.15	2.7e-34	1.3e-32
2R	23613453	23613947	8.85	9.77	5.62	4.15	2.36e-25	6.37e-24
3R	18783687	18784007	5.32	6.24	2.09	4.15	5.43e-10	3.42e-09
3L	8147735	8148117	8.1	9.03	4.88	4.14	1.36e-31	5.43e-30
3L	9690749	9692600	10.57	11.49	7.37	4.12	1.43e-58	2.54e-56
3R	23859889	23860406	9.06	9.98	5.86	4.12	1.05e-25	2.88e-24
3L	17603681	17604336	6.76	7.68	3.58	4.1	1.36e-26	3.98e-25
3L	15548649	15549034	10.48	11.4	7.31	4.09	5.06e-47	4.65e-45
X	8197329	8198361	7.12	8.04	3.95	4.08	3.15e-23	7.34e-22
X	18053165	18053822	7.57	8.49	4.41	4.08	5.47e-19	8.88e-18
X	311474	311831	6.4	7.31	3.24	4.07	1.16e-11	8.91e-11
3L	15591095	15591677	9.42	10.34	6.28	4.06	3.89e-39	2.32e-37
3R	17947808	17949000	10.18	11.1	7.05	4.05	1.41e-48	1.47e-46
3L	7262840	7263695	7.42	8.33	4.29	4.04	1.7e-36	9.07e-35
X	16090176	16090558	5.51	6.42	2.38	4.04	5.64e-14	5.61e-13
2L	9530043	9530353	8.21	9.13	5.13	4	2.14e-39	1.33e-37
3L	18788341	18791959	9.97	10.89	6.9	3.99	2.78e-59	5.67e-57
3L	6199040	6199566	6.84	7.75	3.76	3.99	3.41e-13	3.15e-12
3R	21434961	21436852	9.69	10.6	6.62	3.98	2.06e-43	1.53e-41
X	8786336	8786636	5.34	6.25	2.29	3.96	4.87e-13	4.41e-12
2L	1628339	1628875	7.62	8.53	4.57	3.96	3.88e-06	1.4e-05
3R	5841203	5842972	10.77	11.68	7.73	3.95	1.35e-09	8.02e-09
3L	14419075	14419410	7.71	8.62	4.68	3.94	0.000377	0.000946
3L	2669090	2669475	6.5	7.41	3.49	3.93	6.09e-14	6.05e-13
2L	8738498	8738942	7.55	8.46	4.53	3.93	8.72e-07	3.49e-06
X	22964367	22965646	7.61	8.52	4.61	3.91	7.05e-39	4.16e-37
3L	20395439	20396474	9.98	10.89	6.98	3.91	3.57e-27	1.09e-25
3L	15052563	15053400	8.48	9.39	5.48	3.91	2.36e-19	3.97e-18
3L	5550526	5551372	7.99	8.9	4.98	3.91	2.65e-05	8.23e-05
2R	23924767	23925091	7.37	8.28	4.37	3.9	2.17e-05	6.83e-05
3L	18432913	18433439	6.95	7.86	3.97	3.89	3.1e-15	3.44e-14
2R	20359606	20360166	6.99	7.9	4.02	3.87	2.41e-31	9.48e-30
X	15305552	15306709	8.44	9.34	5.47	3.87	3.51e-28	1.13e-26
2L	20922333	20922642	7.85	8.75	4.89	3.87	2.73e-26	7.9e-25
2R	6137867	6138176	6.89	7.79	3.92	3.87	8.66e-21	1.69e-19
X	20506252	20506911	6.26	7.17	3.31	3.86	3.33e-20	6.26e-19
2R	12604641	12605080	6.63	7.53	3.67	3.86	6.38e-15	6.92e-14
2R	6185692	6186123	5.93	6.83	2.97	3.86	7.86e-12	6.14e-11
3L	3079462	3080515	9.18	10.08	6.27	3.82	5.04e-33	2.25e-31
X	5417461	5418023	8.32	9.22	5.41	3.82	3.63e-32	1.53e-30
3L	11351682	11352494	7.38	8.28	4.47	3.81	2.7e-17	3.6e-16
2L	12498569	12498898	6.1	7	3.2	3.8	2.44e-17	3.28e-16
3L	16643822	16644289	6.44	7.34	3.56	3.78	1.06e-19	1.86e-18
2L	470799	471289	7.41	8.31	4.53	3.77	1.07e-38	6.21e-37
3L	8583357	8583675	7.73	8.63	4.86	3.77	8.06e-26	2.25e-24
3R	6852972	6853511	6.08	6.98	3.21	3.77	5.64e-10	3.53e-09
2R	17275343	17275672	7.84	8.74	4.99	3.75	3.09e-31	1.2e-29
2L	9229055	9229526	6.37	7.27	3.53	3.74	7.53e-22	1.61e-20
2R	6001928	6002668	7.22	8.11	4.37	3.74	3.25e-19	5.42e-18
2L	8976722	8977803	7.92	8.81	5.07	3.74	1.64e-18	2.53e-17
3R	18782209	18783184	7.96	8.85	5.13	3.72	1.87e-28	6.15e-27
3R	27067882	27068347	8.09	8.98	5.26	3.72	0.000395	0.000988
2L	3627814	3628418	10.24	11.14	7.43	3.71	9.91e-47	9e-45
3L	14110851	14111325	5.64	6.53	2.82	3.71	7.21e-12	5.69e-11
3R	9943913	9944834	10.04	10.94	7.23	3.7	2.55e-44	2.03e-42
2R	14033437	14034968	7.99	8.88	5.18	3.7	5.7e-23	1.3e-21
3L	18631948	18632252	6.55	7.44	3.74	3.7	2.55e-19	4.28e-18
X	3358298	3358662	7.8	8.69	4.99	3.7	4.63e-06	1.65e-05
3R	21437906	21438339	7.88	8.77	5.07	3.7	7.4e-05	0.000213
2L	1634885	1635351	9.42	10.32	6.62	3.69	1.04e-29	3.68e-28
3R	16200918	16201328	7.38	8.27	4.58	3.69	5.86e-17	7.56e-16
X	3592861	3593163	5.54	6.43	2.74	3.69	3.38e-12	2.77e-11
2R	14032269	14033182	8.22	9.11	5.43	3.68	2.11e-35	1.05e-33
3R	23010462	23011654	8.33	9.22	5.55	3.68	4.5e-18	6.57e-17
2L	13840531	13841245	8.4	9.29	5.64	3.65	5.5e-25	1.44e-23
X	16900487	16901489	9.1	9.99	6.35	3.64	9.85e-30	3.5e-28
3L	20793834	20794190	9.29	10.18	6.53	3.64	5.96e-26	1.67e-24
2R	19535641	19535973	6.07	6.96	3.32	3.64	5.8e-12	4.6e-11
3L	17047761	17048243	7.49	8.38	4.75	3.63	6.1e-32	2.5e-30
2L	5890206	5891071	8.01	8.9	5.27	3.63	8.24e-26	2.29e-24
X	9177536	9178753	7.86	8.75	5.12	3.63	7.27e-20	1.31e-18
3L	8829198	8829934	8.15	9.03	5.41	3.62	3.91e-22	8.46e-21
3L	11285827	11286177	8.56	9.45	5.85	3.6	5.75e-32	2.37e-30
X	13966573	13966881	4.96	5.85	2.25	3.6	8.93e-10	5.42e-09
X	16904678	16905975	10.57	11.45	7.87	3.58	4.21e-48	4.2e-46
2R	21549151	21549451	7.59	8.47	4.89	3.58	4.85e-27	1.46e-25
2R	11654561	11655649	9.43	10.31	6.74	3.57	1.45e-32	6.28e-31
3R	23335411	23335833	8.93	9.81	6.24	3.57	7.24e-30	2.59e-28
X	13206696	13207586	8.13	9.01	5.44	3.57	1.97e-20	3.78e-19
3R	21423517	21424062	6	6.88	3.32	3.56	9.3e-15	9.93e-14
2L	1931086	1931386	6.95	7.83	4.28	3.56	2.4e-14	2.47e-13
2L	9009452	9009817	5.61	6.49	2.93	3.56	8.14e-11	5.6e-10
3L	17958601	17959028	9.37	10.25	6.7	3.55	4.98e-26	1.4e-24
2R	15271525	15272318	7.58	8.46	4.92	3.54	1.23e-15	1.43e-14
3R	21426761	21427297	6.43	7.32	3.78	3.54	1.82e-13	1.72e-12
3R	16202142	16202442	5.88	6.76	3.22	3.54	1.8e-09	1.04e-08
X	3925841	3926405	6.06	6.94	3.4	3.54	3.51e-07	1.49e-06
X	16075595	16076250	7.19	8.07	4.53	3.54	0.00164	0.00366
X	3380942	3381570	8.25	9.13	5.61	3.52	8.61e-28	2.72e-26
3L	22886783	22887467	7.06	7.93	4.43	3.5	1.59e-21	3.28e-20
2R	9199921	9200272	9.31	10.19	6.7	3.48	1.43e-07	6.4e-07
2L	1635501	1637595	10.87	11.75	8.28	3.47	6.82e-34	3.18e-32
2R	11061835	11062505	7.94	8.81	5.34	3.47	2.08e-23	4.9e-22
3L	4858224	4860277	9.78	10.66	7.19	3.47	4.19e-21	8.46e-20
2L	16530978	16531673	6.52	7.4	3.93	3.47	3.33e-18	5.01e-17
3R	21425628	21426197	6.47	7.35	3.88	3.47	1.66e-16	2.06e-15
3R	9264245	9264616	8.08	8.95	5.48	3.47	0.00328	0.00682
3L	13060489	13060789	5.26	6.13	2.67	3.46	3.37e-10	2.18e-09
3L	20534724	20535185	6.4	7.28	3.82	3.46	2.9e-08	1.44e-07
X	13637309	13638090	10.92	11.8	8.35	3.45	7.52e-29	2.54e-27
X	5211067	5211592	6.99	7.86	4.42	3.44	6.91e-22	1.48e-20
2L	7523517	7523882	8.15	9.03	5.59	3.44	5.72e-18	8.27e-17
3L	16885692	16886600	7.79	8.66	5.23	3.43	1.31e-19	2.27e-18
3L	17604787	17605961	7.89	8.77	5.34	3.42	6.01e-21	1.19e-19
X	10485501	10486061	9.18	10.05	6.63	3.42	9.17e-18	1.29e-16
3L	8750157	8750900	6.96	7.83	4.43	3.4	1.93e-26	5.65e-25
3L	17902988	17903602	7.26	8.13	4.72	3.4	1.36e-24	3.47e-23
3R	6724377	6724892	6.19	7.06	3.67	3.39	6.24e-12	4.94e-11
3L	3773184	3773623	5.56	6.42	3.04	3.39	2.3e-11	1.7e-10
4	42584	43523	9.44	10.31	6.92	3.39	2.73e-05	8.44e-05
3L	13068010	13070278	11.49	12.36	8.99	3.37	5.21e-40	3.42e-38
2R	22162466	22163134	8.13	8.99	5.63	3.36	2.09e-30	7.87e-29
2L	4905994	4906516	9.72	10.58	7.22	3.36	1.19e-24	3.05e-23
3R	30917141	30917765	7.48	8.35	4.99	3.36	1.61e-12	1.36e-11
2L	18575047	18575662	8.18	9.04	5.68	3.36	4.73e-06	1.68e-05
X	10262997	10264085	7.64	8.51	5.16	3.35	5.52e-19	8.94e-18
2L	7043672	7044281	6.17	7.04	3.69	3.35	1.66e-15	1.9e-14
X	17582035	17583060	9.29	10.16	6.82	3.34	1.01e-26	3.01e-25
3L	22691603	22692057	6.92	7.78	4.44	3.34	7.01e-10	4.32e-09
X	19879298	19879803	6.45	7.32	3.98	3.33	5.06e-09	2.76e-08
2L	14396957	14399969	10.54	11.4	8.08	3.32	5.73e-40	3.69e-38
3R	25541731	25543559	9.11	9.97	6.65	3.32	2.33e-24	5.76e-23
2L	12175783	12176425	6.64	7.5	4.18	3.32	3.86e-16	4.66e-15
3L	17410975	17411600	9.36	10.22	6.9	3.32	0.000135	0.00037
3R	5493694	5494613	8.53	9.39	6.08	3.31	5.83e-24	1.4e-22
2R	9949095	9949865	7.81	8.67	5.36	3.31	3.87e-17	5.09e-16
X	12612226	12613439	8.94	9.8	6.49	3.3	4e-22	8.63e-21
X	8841037	8841337	5.09	5.95	2.64	3.3	1.94e-07	8.51e-07
2L	8529455	8531704	11.07	11.93	8.64	3.29	5.25e-36	2.67e-34
2L	470116	470692	8	8.86	5.57	3.29	4.36e-28	1.4e-26
4	904185	905325	8.13	8.99	5.69	3.29	7.59e-27	2.27e-25
3R	10543989	10545209	9.07	9.93	6.65	3.28	1.41e-38	8.11e-37
2R	21302756	21303368	10.25	11.11	7.83	3.28	4.39e-32	1.84e-30
3L	22053330	22053852	7.32	8.18	4.9	3.28	1.49e-22	3.29e-21
3R	23663691	23664829	7.92	8.78	5.5	3.28	1.02e-17	1.43e-16
2L	16530035	16530476	6.19	7.05	3.77	3.28	5.14e-10	3.25e-09
3L	12874516	12874830	6.21	7.07	3.79	3.28	2.27e-08	1.14e-07
2L	12481346	12482165	8.45	9.31	6.04	3.27	1.33e-17	1.85e-16
4	907886	908472	6.45	7.31	4.04	3.27	3.09e-16	3.78e-15
3R	23012154	23012474	8.63	9.49	6.23	3.26	1.13e-23	2.71e-22
3R	29478798	29479504	8.96	9.82	6.56	3.26	7.13e-23	1.61e-21
X	8187339	8187925	6.73	7.58	4.32	3.26	1.36e-17	1.89e-16
2R	23712229	23712705	10.9	11.76	8.51	3.25	5.11e-49	5.4e-47
X	12674010	12674834	9.62	10.47	7.22	3.25	9.89e-33	4.38e-31
2R	16848591	16849866	8.27	9.12	5.88	3.24	1.04e-18	1.64e-17
3R	16405710	16406322	7.05	7.91	4.66	3.24	0.000249	0.000651
2L	18326947	18328145	8.32	9.18	5.95	3.23	7.49e-23	1.68e-21
2L	7629501	7630303	7.97	8.82	5.6	3.23	3.36e-19	5.57e-18
3L	11083736	11084657	9.02	9.87	6.64	3.23	1.21e-17	1.68e-16
3L	4541686	4542268	8.87	9.72	6.51	3.22	1.39e-29	4.82e-28
2R	17319206	17320260	7.51	8.36	5.14	3.22	4.58e-21	9.17e-20
2L	8981740	8982040	6.69	7.54	4.33	3.22	3.95e-18	5.85e-17
3R	18741390	18742428	8.02	8.87	5.66	3.21	6.82e-23	1.54e-21
3R	5500737	5501606	8.19	9.04	5.83	3.2	2.79e-24	6.84e-23
2L	18626793	18627371	9.49	10.34	7.14	3.2	5.58e-21	1.11e-19
X	8846231	8846637	6.87	7.72	4.52	3.2	9.66e-20	1.71e-18
3L	18630234	18631682	9.31	10.16	6.96	3.2	2.09e-06	7.85e-06
3R	24298565	24299100	9.79	10.64	7.45	3.19	1.83e-22	4.01e-21
3L	17658431	17659181	10.89	11.74	8.56	3.18	1.25e-32	5.47e-31
3R	6873168	6874001	6.47	7.32	4.14	3.18	4.06e-19	6.66e-18
2L	12484080	12484705	7.22	8.07	4.9	3.17	1.8e-17	2.46e-16
2L	12493101	12493431	8.22	9.06	5.89	3.17	3.52e-13	3.25e-12
X	20794109	20794793	7.13	7.97	4.8	3.17	1.73e-10	1.15e-09
3L	18780982	18782803	8.58	9.43	6.27	3.16	1.72e-32	7.33e-31
3R	21713782	21714800	8.92	9.77	6.61	3.16	8.07e-20	1.44e-18
X	2662888	2663706	7.96	8.81	5.64	3.16	9.22e-19	1.46e-17
2R	17500890	17501230	6.09	6.93	3.77	3.16	2e-10	1.32e-09
2L	3120668	3122034	9.58	10.43	7.27	3.15	3.29e-30	1.21e-28
3R	23677612	23678288	8.23	9.08	5.93	3.15	1.49e-18	2.31e-17
2L	12369259	12369871	10.29	11.13	7.99	3.14	1.12e-32	4.91e-31
X	15579649	15579972	7.61	8.45	5.32	3.13	6.21e-23	1.41e-21
X	13633152	13633907	9.34	10.18	7.05	3.13	1.05e-18	1.66e-17
2R	14220431	14221152	10.22	11.06	7.95	3.11	7.61e-37	4.11e-35
2R	19940273	19941282	9.27	10.12	7.01	3.11	4.81e-29	1.64e-27
2L	10751669	10752622	9	9.84	6.73	3.11	6.62e-21	1.31e-19
2R	21872967	21873267	6.64	7.48	4.39	3.1	1.86e-08	9.43e-08
3L	9356414	9357296	8.97	9.81	6.72	3.09	4.25e-25	1.13e-23
3L	17602713	17603579	7.38	8.22	5.14	3.09	6.93e-16	8.18e-15
3L	12801196	12801742	5.92	6.76	3.67	3.09	9.83e-12	7.61e-11
3L	19903924	19904410	8.4	9.24	6.17	3.08	6.21e-20	1.13e-18
2L	9473830	9474303	6.22	7.06	3.98	3.08	1.47e-14	1.54e-13
X	8840235	8840535	5.12	5.96	2.88	3.08	1.1e-05	3.65e-05
3R	18579613	18579998	7.91	8.75	5.67	3.08	0.000218	0.000577
3L	19777786	19778441	9.29	10.13	7.07	3.06	1.27e-22	2.82e-21
3L	5999628	6000169	5.77	6.6	3.54	3.06	1.16e-11	8.93e-11
3R	21674689	21675246	6.33	7.16	4.13	3.04	7.98e-07	3.21e-06
X	14212952	14213827	9.93	10.77	7.73	3.03	9.45e-28	2.97e-26
2L	6087969	6088873	9.92	10.75	7.73	3.03	4.15e-27	1.27e-25
X	8864008	8864434	6.95	7.78	4.75	3.03	9.4e-22	1.98e-20
2R	21539802	21541222	10.78	11.61	8.59	3.02	3.05e-30	1.13e-28
X	23344967	23345267	5	5.83	2.82	3.01	4.21e-05	0.000127
3R	4668899	4669785	7.83	8.66	5.66	3	2.55e-25	6.87e-24
2R	14335996	14336296	8.13	8.96	5.96	3	1.32e-14	1.39e-13
3L	18045674	18046383	7.09	7.92	4.93	3	0.0189	0.0331
3R	21470207	21472053	10.73	11.56	8.57	2.99	9.92e-22	2.08e-20
2R	14130655	14132628	9.34	10.16	7.2	2.97	1.95e-26	5.68e-25
2L	16842462	16843357	8.51	9.34	6.37	2.97	4.93e-25	1.3e-23
X	12719513	12720910	8.7	9.52	6.55	2.97	5.32e-23	1.22e-21
3L	11510214	11510824	7.82	8.65	5.68	2.97	8.92e-19	1.42e-17
2L	9176003	9176989	8.92	9.75	6.79	2.96	4.62e-25	1.22e-23
3L	22396635	22397899	8.37	9.2	6.24	2.96	4.52e-21	9.07e-20
3L	14953268	14954249	6.65	7.47	4.52	2.96	2.16e-14	2.23e-13
2R	9047778	9048492	6.05	6.87	3.92	2.96	2.28e-10	1.5e-09
X	8885676	8886735	7.62	8.44	5.48	2.96	0.00011	0.000306
3R	21427422	21428105	9.52	10.35	7.4	2.95	6.95e-22	1.49e-20
2L	16382944	16383697	6.73	7.56	4.6	2.95	3.78e-08	1.83e-07
X	11666805	11667564	6.55	7.37	4.42	2.95	4.7e-07	1.97e-06
3L	5994233	5995579	9.03	9.85	6.91	2.94	2.09e-17	2.83e-16
2R	20088616	20089743	8.47	9.29	6.36	2.93	1.74e-24	4.35e-23
X	1984764	1985175	7.56	8.38	5.45	2.93	2.52e-15	2.84e-14
2L	5873752	5874276	7.45	8.28	5.34	2.93	8.58e-10	5.22e-09
2L	21108746	21109469	6.18	7	4.07	2.93	1.71e-09	9.98e-09
3R	24029558	24031162	8.18	9	6.07	2.92	9.41e-23	2.1e-21
3R	9874058	9875552	9.02	9.84	6.93	2.91	3.75e-25	9.99e-24
3R	20548374	20549277	10.07	10.89	7.98	2.91	4.88e-17	6.34e-16
2R	7014598	7015017	7.68	8.5	5.6	2.91	8.87e-17	1.13e-15
2R	11045657	11046366	7.91	8.73	5.81	2.91	9.2e-11	6.29e-10
2R	7759164	7759576	10.08	10.9	8	2.9	1.13e-35	5.69e-34
2L	83804	86069	10.11	10.93	8.03	2.9	2.75e-28	8.89e-27
2L	20003362	20005255	10.63	11.45	8.55	2.9	8.47e-22	1.8e-20
2L	18556336	18556665	8.92	9.74	6.84	2.9	3.99e-21	8.08e-20
2R	13095456	13096480	7.29	8.1	5.21	2.9	2.52e-11	1.85e-10
X	11337821	11338364	6.86	7.67	4.79	2.89	2.33e-13	2.18e-12
3L	21881497	21881983	8.39	9.21	6.32	2.88	3.55e-21	7.23e-20
2R	11607629	11608098	7.23	8.05	5.18	2.88	7.32e-21	1.44e-19
2R	17269788	17270375	8.51	9.33	6.44	2.88	5.93e-18	8.52e-17
3R	14019928	14020803	7.65	8.46	5.58	2.88	2.42e-17	3.25e-16
2L	14396157	14396743	10.13	10.95	8.07	2.87	1.59e-24	4.01e-23
2R	14336518	14336916	8.63	9.45	6.58	2.87	1.58e-18	2.45e-17
3R	6874905	6875756	7.28	8.09	5.22	2.87	9.4e-14	9.12e-13
2L	3225769	3227190	7.38	8.2	5.33	2.87	0.000381	0.000956
3L	19294745	19295250	7.12	7.93	5.07	2.86	4.83e-17	6.29e-16
X	18879846	18880461	6.3	7.11	4.26	2.86	3.64e-12	2.97e-11
X	5418637	5418937	7.41	8.22	5.37	2.85	4.66e-22	1e-20
4	433246	433861	6.63	7.44	4.59	2.85	1.81e-13	1.71e-12
2L	16315241	16315588	9.28	10.1	7.24	2.85	5.05e-05	0.00015
2L	21622832	21623218	9.79	10.6	7.76	2.84	8.3e-20	1.47e-18
3L	12802381	12803914	7.41	8.23	5.39	2.84	2.94e-15	3.28e-14
3L	18768293	18768747	7.58	8.39	5.55	2.84	4.47e-15	4.91e-14
X	337973	338719	6.87	7.68	4.84	2.84	8.09e-11	5.56e-10
2L	3610550	3611187	7.34	8.15	5.31	2.84	2.11e-10	1.39e-09
3L	22411193	22411565	7.17	7.98	5.15	2.84	9.96e-10	5.98e-09
2R	13995431	13996109	8.89	9.7	6.87	2.83	2.94e-27	9.1e-26
3L	3083788	3084395	9.52	10.33	7.5	2.83	1.96e-21	4.02e-20
3L	1582525	1583032	8.33	9.14	6.31	2.83	8.44e-18	1.2e-16
3L	13284286	13284735	7.16	7.97	5.14	2.83	1e-11	7.75e-11
2R	18949599	18949899	5.15	5.96	3.13	2.83	2.91e-05	8.97e-05
3R	7284560	7285276	6.4	7.21	4.39	2.81	2.42e-15	2.74e-14
2R	21041414	21042563	8.61	9.42	6.61	2.81	7.1e-13	6.3e-12
3L	2163520	2163878	9.03	9.84	7.03	2.81	4.56e-12	3.67e-11
2R	7745528	7745855	7.71	8.52	5.72	2.8	1.92e-17	2.61e-16
2R	9389549	9390552	7.94	8.75	5.95	2.8	0.000256	0.000667
3L	16889010	16890192	8.37	9.18	6.38	2.8	0.000275	0.000713
2R	7771960	7772667	9	9.8	7.03	2.77	1.43e-19	2.46e-18
2L	16111353	16112214	10.37	11.18	8.41	2.77	1.56e-14	1.62e-13
X	3695244	3695957	6.2	7	4.23	2.77	2.04e-11	1.51e-10
2L	13595459	13595993	6.06	6.87	4.1	2.77	4.12e-10	2.64e-09
2L	14230342	14230913	9.61	10.41	7.66	2.76	3.04e-21	6.21e-20
2L	15154195	15154730	7.46	8.27	5.51	2.76	4.63e-20	8.46e-19
X	2744409	2744800	9.16	9.96	7.19	2.76	1.47e-11	1.12e-10
3L	14156547	14157413	7.04	7.84	5.08	2.76	2.48e-11	1.82e-10
2R	23377655	23378035	5.27	6.08	3.31	2.76	4.26e-07	1.79e-06
2L	19163450	19165563	10	10.8	8.06	2.75	3.39e-26	9.67e-25
3R	21537183	21538458	8.56	9.36	6.61	2.75	2.89e-20	5.47e-19
2L	1656713	1657509	10.66	11.46	8.72	2.74	1.54e-19	2.64e-18
2R	6500907	6501912	8.69	9.49	6.75	2.74	2.34e-16	2.88e-15
X	9588391	9589347	7.04	7.84	5.1	2.74	1.15e-11	8.82e-11
X	859574	860268	6.57	7.37	4.63	2.74	1.86e-06	7.04e-06
X	5934321	5935764	8.2	9	6.26	2.73	3.61e-25	9.64e-24
2L	12370708	12371206	7.78	8.58	5.84	2.73	3.71e-18	5.51e-17
2L	19473844	19474648	7.4	8.19	5.46	2.73	1.49e-14	1.56e-13
2R	5781564	5781951	8.37	9.17	6.44	2.73	2.88e-14	2.94e-13
X	20507069	20507475	6.01	6.81	4.07	2.73	1.06e-09	6.32e-09
3R	15523816	15524165	6.16	6.95	4.22	2.73	8.39e-07	3.37e-06
3R	26108346	26108834	9.81	10.61	7.89	2.72	1.93e-19	3.26e-18
2L	12372505	12373187	7.94	8.74	6.02	2.72	5.03e-10	3.19e-09
2L	5927087	5927416	6.38	7.17	4.45	2.72	8.3e-10	5.07e-09
3R	16883594	16883927	5.07	5.87	3.15	2.72	7.96e-07	3.2e-06
2R	25057026	25057638	5.9	6.69	3.98	2.72	1.35e-06	5.24e-06
3L	19906370	19907860	10.85	11.65	8.93	2.71	1.39e-24	3.53e-23
2R	14308137	14309890	10.22	11.02	8.31	2.71	2.01e-22	4.39e-21
2L	17220067	17222408	9.18	9.98	7.27	2.71	7.48e-14	7.36e-13
3R	4286428	4286728	7.02	7.82	5.11	2.71	7.58e-08	3.53e-07
3R	9594013	9594736	9.19	9.98	7.28	2.7	7.66e-17	9.76e-16
3R	10093416	10094757	7.67	8.46	5.76	2.7	3.47e-16	4.23e-15
2R	19523132	19523456	6.1	6.89	4.2	2.69	8.58e-05	0.000245
X	15300609	15301322	9.94	10.73	8.05	2.68	8.3e-26	2.3e-24
3R	22210640	22212008	7.92	8.71	6.03	2.68	6.68e-13	5.94e-12
3R	10452516	10453175	10.28	11.07	8.4	2.67	6.41e-20	1.16e-18
3R	8960176	8961227	8.32	9.11	6.44	2.67	1.36e-19	2.35e-18
2R	9699189	9699644	6.01	6.8	4.12	2.67	9.66e-10	5.81e-09
3L	13193626	13194804	10.05	10.84	8.17	2.67	2.52e-05	7.84e-05
3R	4565361	4565989	7.65	8.43	5.78	2.66	3.79e-20	7.02e-19
2R	22386474	22388123	10.08	10.87	8.21	2.66	3.38e-17	4.45e-16
3R	10131266	10131725	8.64	9.42	6.77	2.66	2.55e-13	2.39e-12
3L	20398096	20398588	9.66	10.44	7.79	2.65	7.46e-20	1.34e-18
3R	18292888	18293197	8.42	9.21	6.56	2.65	7.69e-13	6.8e-12
2L	8937655	8938407	7.35	8.13	5.48	2.65	1.51e-07	6.76e-07
3L	4411655	4412128	8.69	9.47	6.83	2.64	1.5e-21	3.11e-20
2L	16284773	16285368	9.87	10.66	8.02	2.64	2.33e-17	3.13e-16
2R	16216782	16219161	13.19	13.98	11.34	2.63	2.17e-25	5.9e-24
3R	28585742	28586526	8.95	9.74	7.11	2.62	3.7e-26	1.05e-24
2R	19293095	19293874	10.51	11.29	8.67	2.62	2.32e-18	3.53e-17
3R	17395122	17395650	9.68	10.46	7.84	2.62	1.17e-14	1.24e-13
2L	6469946	6471306	7.56	8.34	5.72	2.62	1.07e-13	1.04e-12
3R	10884525	10884927	9.13	9.91	7.3	2.61	5.08e-24	1.22e-22
X	20747730	20749226	8.94	9.72	7.11	2.61	7.24e-15	7.82e-14
3R	6889912	6890814	7.53	8.31	5.7	2.61	4.88e-11	3.44e-10
3L	18771730	18772254	9.95	10.73	8.13	2.6	6.32e-18	9.05e-17
3L	8036027	8036473	9.2	9.98	7.38	2.6	1.16e-17	1.62e-16
3R	16625999	16627005	8.13	8.91	6.31	2.6	2.93e-15	3.27e-14
2R	21080644	21081055	7.53	8.31	5.71	2.6	4.83e-14	4.86e-13
X	3490652	3491285	7.49	8.27	5.67	2.6	2.07e-12	1.74e-11
X	1177531	1178294	6.67	7.44	4.85	2.6	3.61e-07	1.53e-06
3L	13912950	13913908	9.05	9.83	7.24	2.59	4.01e-17	5.25e-16
3R	14020911	14021606	7.69	8.47	5.88	2.59	6.05e-16	7.22e-15
3R	6881314	6882419	7.18	7.95	5.37	2.59	1.24e-15	1.43e-14
2R	23614377	23614677	7.13	7.91	5.31	2.59	3.67e-11	2.62e-10
3L	11049510	11049829	6.21	6.99	4.39	2.59	1.25e-10	8.44e-10
3L	16001918	16004049	10.89	11.67	9.08	2.58	2.16e-26	6.28e-25
2L	8982191	8983069	7.7	8.48	5.9	2.58	8.4e-14	8.21e-13
2R	21503391	21504205	6.68	7.45	4.87	2.58	1.36e-11	1.03e-10
X	20751791	20752276	5.6	6.37	3.8	2.58	1.77e-07	7.84e-07
2L	7628228	7629303	8.66	9.43	6.86	2.57	2.48e-22	5.41e-21
3R	19619992	19620301	7.96	8.73	6.16	2.57	1.13e-19	1.96e-18
2L	11039466	11040060	9.81	10.58	8.02	2.57	2.73e-18	4.14e-17
3L	9763516	9764050	8.55	9.33	6.76	2.57	2.41e-15	2.73e-14
3R	4664868	4665920	7.92	8.7	6.13	2.57	1.03e-13	9.97e-13
3L	18136210	18138229	7.81	8.59	6.01	2.57	2.76e-10	1.8e-09
2L	18559205	18559835	8.12	8.9	6.33	2.57	1.51e-09	8.91e-09
X	13638226	13639739	9.81	10.59	8.02	2.57	4.93e-05	0.000146
X	349956	350831	7.99	8.76	6.21	2.56	7.29e-15	7.87e-14
X	17415657	17418256	9.24	10.02	7.47	2.55	6.61e-20	1.19e-18
4	1103802	1104533	9.8	10.57	8.03	2.55	5.68e-19	9.14e-18
2L	19416324	19416699	8.66	9.44	6.88	2.55	5.81e-15	6.32e-14
3L	7811260	7811634	6.72	7.5	4.94	2.55	4.61e-09	2.53e-08
2L	4026280	4026663	5.4	6.17	3.62	2.55	3.18e-07	1.36e-06
3L	9010452	9011003	6.55	7.33	4.78	2.55	0.0132	0.0239
3L	18175090	18176978	10.24	11.01	8.48	2.53	3.43e-18	5.14e-17
X	12576626	12577202	7.1	7.87	5.34	2.53	1.3e-12	1.12e-11
3L	18837555	18838846	7.28	8.05	5.52	2.53	1.52e-09	8.93e-09
X	5799920	5800688	6.62	7.39	4.86	2.53	2.17e-09	1.25e-08
3R	14490447	14491302	7.72	8.49	5.96	2.52	2.58e-15	2.9e-14
2R	11666627	11667844	8.53	9.3	6.78	2.52	1.56e-14	1.62e-13
2R	12011844	12012452	8.41	9.18	6.66	2.52	3.31e-09	1.86e-08
3L	14423999	14424897	9.74	10.51	8	2.5	7.32e-19	1.17e-17
3R	28305905	28307993	8.13	8.89	6.39	2.5	2.09e-18	3.18e-17
2L	12473715	12474015	8.54	9.3	6.8	2.5	3.68e-18	5.47e-17
3R	27069369	27069700	8.83	9.6	7.1	2.5	1.23e-15	1.43e-14
X	17624476	17625280	8.31	9.08	6.58	2.5	1.9e-14	1.97e-13
2R	24389535	24389968	6.86	7.63	5.12	2.5	3.09e-12	2.54e-11
X	2362022	2362734	7.57	8.34	5.83	2.5	3.32e-12	2.72e-11
2L	9524871	9526087	10.34	11.1	8.61	2.49	1.49e-23	3.55e-22
3L	22822621	22822969	9.44	10.2	7.71	2.49	6.11e-23	1.39e-21
X	5419131	5419888	8.96	9.72	7.23	2.49	5.76e-18	8.31e-17
2L	2221987	2222287	8.23	8.99	6.5	2.49	2.95e-16	3.6e-15
3R	27446393	27448613	10.03	10.79	8.31	2.49	4.56e-16	5.48e-15
3L	21082387	21082964	7.96	8.72	6.24	2.49	1.76e-12	1.49e-11
3L	7810626	7810977	6.68	7.45	4.96	2.49	1.98e-10	1.31e-09
X	23354510	23355327	7.42	8.18	5.69	2.49	6.09e-07	2.5e-06
X	14069133	14069613	5.61	6.37	3.88	2.49	3.86e-06	1.39e-05
3R	24571044	24571957	9.67	10.44	7.95	2.48	9.11e-18	1.29e-16
2L	16710209	16711762	8.19	8.95	6.47	2.48	3.57e-16	4.33e-15
3L	21201123	21201529	9.46	10.22	7.74	2.48	2.58e-15	2.9e-14
3L	10550865	10552476	10.25	11.01	8.55	2.47	1.08e-18	1.69e-17
2R	9200408	9201298	7.73	8.49	6.02	2.47	8.77e-18	1.24e-16
3R	25659374	25659865	8.19	8.95	6.48	2.47	4.38e-12	3.55e-11
2R	21073617	21074190	9.32	10.08	7.62	2.46	1.44e-14	1.51e-13
2R	9861230	9861666	7.22	7.98	5.52	2.46	4.58e-10	2.91e-09
2R	7449967	7450758	7.72	8.48	6.02	2.46	9.62e-10	5.79e-09
3L	23083472	23084428	6.41	7.17	4.71	2.46	2.43e-05	7.59e-05
2L	5148603	5149134	7.56	8.32	5.87	2.45	6.58e-16	7.8e-15
3L	15326878	15327521	6.61	7.37	4.91	2.45	6.15e-12	4.88e-11
3L	11555619	11556748	8.88	9.64	7.18	2.45	5.38e-09	2.93e-08
2R	17478164	17478566	8.38	9.14	6.7	2.44	2.94e-15	3.28e-14
3R	20782551	20783379	7.62	8.38	5.94	2.44	1.19e-14	1.26e-13
3R	4660893	4661362	8.83	9.58	7.14	2.44	7.59e-12	5.94e-11
2R	11627495	11628131	8.76	9.51	7.09	2.43	7.43e-23	1.67e-21
3R	9437707	9439184	9.78	10.53	8.11	2.43	4.11e-18	6.05e-17
2R	14698649	14699147	9.8	10.55	8.13	2.42	2.34e-13	2.19e-12
X	16089018	16089791	7.32	8.08	5.66	2.42	3.96e-08	1.91e-07
3R	6778264	6778934	10.13	10.88	8.47	2.41	4.01e-24	9.68e-23
2L	18693571	18694230	11.47	12.22	9.81	2.41	3e-23	7.01e-22
3L	18381551	18383527	9.61	10.36	7.96	2.41	5e-14	5.01e-13
X	5103946	5104935	9.39	10.14	7.73	2.41	3.41e-11	2.44e-10
3L	15672273	15672857	6.56	7.31	4.9	2.41	1.37e-10	9.17e-10
X	11425700	11426290	6.8	7.55	5.14	2.41	9.61e-09	5.06e-08
2R	13934578	13935065	8.98	9.74	7.33	2.4	4.52e-20	8.31e-19
3L	11286881	11287186	9.04	9.79	7.39	2.4	1.47e-14	1.55e-13
2R	11610002	11610691	6.53	7.28	4.88	2.4	3.63e-10	2.34e-09
3R	9418007	9419372	10.63	11.38	8.99	2.39	1.28e-21	2.66e-20
3L	8148332	8149399	8.35	9.1	6.71	2.39	1.15e-18	1.79e-17
2R	10024904	10025855	9.84	10.59	8.2	2.39	2.74e-17	3.64e-16
X	4968414	4968739	5.87	6.61	4.23	2.39	5.65e-06	1.98e-05
2L	19146448	19147390	9.77	10.51	8.13	2.38	4.56e-20	8.36e-19
2L	9182762	9183389	8.78	9.52	7.14	2.38	7.08e-19	1.13e-17
3L	14625520	14626016	8.26	9.01	6.63	2.38	7.97e-15	8.58e-14
2L	14377181	14377762	7.43	8.18	5.8	2.38	1.86e-12	1.57e-11
2L	11333045	11334476	8.73	9.47	7.1	2.38	3.69e-11	2.63e-10
3L	12046483	12046843	7.05	7.8	5.42	2.38	2.74e-10	1.79e-09
X	9583244	9583616	10.04	10.78	8.41	2.38	4.2e-10	2.69e-09
3R	6848244	6848924	7.39	8.14	5.76	2.38	1.14e-08	5.91e-08
2L	2165636	2166566	10.89	11.63	9.26	2.37	1.46e-17	2.02e-16
2L	1637632	1638440	9.81	10.56	8.19	2.37	1.14e-14	1.21e-13
2L	9177748	9178296	8.52	9.26	6.9	2.37	2.23e-09	1.28e-08
2L	8104241	8104786	8.54	9.28	6.92	2.36	2.32e-13	2.18e-12
3L	13225739	13228646	11.85	12.59	10.23	2.36	1.49e-12	1.27e-11
3R	28587979	28588316	8.04	8.78	6.42	2.36	1.71e-09	9.98e-09
3L	13136624	13136992	6.92	7.66	5.3	2.36	8.79e-08	4.06e-07
2R	21966410	21966752	5.58	6.32	3.97	2.36	0.000117	0.000324
3R	4661512	4661883	7.75	8.5	6.13	2.36	0.0119	0.0217
3R	21581314	21582390	10.05	10.79	8.44	2.35	8.99e-18	1.27e-16
2R	17015199	17015837	9.27	10.01	7.65	2.35	1.71e-14	1.78e-13
2L	6629062	6629841	6.07	6.81	4.46	2.35	8.48e-07	3.4e-06
2R	8607819	8608200	6.09	6.83	4.48	2.35	7.78e-06	2.65e-05
3L	9696151	9696509	9.31	10.05	7.71	2.34	1.43e-19	2.46e-18
3R	20547564	20548270	8.03	8.77	6.43	2.34	8.17e-13	7.2e-12
2R	14884209	14884733	8.7	9.44	7.1	2.34	2.09e-09	1.2e-08
3R	6722080	6722693	6.14	6.88	4.54	2.34	5.21e-08	2.48e-07
X	13815362	13815834	8.16	8.9	6.57	2.33	0.00618	0.0121
2R	13935620	13935958	7.92	8.66	6.34	2.32	5.48e-10	3.44e-09
X	16333386	16334366	11.21	11.94	9.63	2.32	5.59e-10	3.5e-09
3R	30074943	30075284	6.42	7.16	4.84	2.32	0.000151	0.000411
3R	29280813	29281588	7.49	8.22	5.91	2.31	4.35e-13	3.97e-12
3R	9700432	9700972	9	9.74	7.43	2.31	5.63e-13	5.04e-12
3R	28897065	28898074	9.04	9.77	7.48	2.3	1.54e-16	1.92e-15
X	13104502	13105953	9.14	9.87	7.57	2.3	3.9e-11	2.77e-10
X	14695695	14696677	7.09	7.82	5.52	2.3	1.41e-09	8.33e-09
2L	995448	996681	6.72	7.46	5.16	2.3	3.34e-08	1.64e-07
2R	13490364	13490788	6.72	7.45	5.15	2.3	1.74e-07	7.71e-07
2R	6034445	6034949	6.24	6.97	4.67	2.3	1.56e-06	5.97e-06
2R	23241545	23242503	7.07	7.81	5.5	2.3	2.12e-06	7.98e-06
3R	15089968	15090841	10.48	11.21	8.93	2.29	1.62e-18	2.5e-17
2L	5961052	5961877	8.73	9.46	7.17	2.29	2.22e-17	2.99e-16
3L	9502211	9502771	7.18	7.91	5.62	2.29	1.37e-12	1.18e-11
2R	18374854	18375604	6.82	7.56	5.27	2.29	1.92e-08	9.72e-08
3R	31621518	31622022	5.95	6.68	4.39	2.29	1e-05	3.34e-05
2L	5940997	5941529	7	7.73	5.44	2.29	2.76e-05	8.55e-05
3R	23942039	23942576	8.61	9.34	7.05	2.28	9.42e-20	1.67e-18
X	179977	181407	8.8	9.53	7.26	2.28	7.03e-17	9e-16
2L	10472318	10472753	8.9	9.63	7.35	2.28	2.5e-10	1.64e-09
3L	12433245	12434005	8.01	8.74	6.47	2.28	3.63e-10	2.34e-09
2L	1649746	1650377	8.46	9.19	6.91	2.28	6.65e-10	4.12e-09
3L	16708742	16710162	10.33	11.06	8.79	2.27	3.67e-18	5.47e-17
3L	20939904	20940222	9.43	10.16	7.89	2.27	6.73e-17	8.63e-16
3L	14624744	14625318	8.17	8.9	6.62	2.27	1.3e-13	1.24e-12
2L	8743235	8743882	8.39	9.12	6.85	2.27	1.75e-11	1.31e-10
3L	18817249	18818512	7.62	8.35	6.08	2.27	4.04e-09	2.23e-08
2L	22053234	22053655	5.77	6.5	4.23	2.27	9.85e-06	3.28e-05
3L	1355224	1355812	9.32	10.05	7.78	2.27	0.00913	0.0172
2L	9508043	9508501	9.48	10.21	7.94	2.26	4.36e-15	4.8e-14
2R	3940970	3941644	7.63	8.36	6.09	2.26	5.27e-13	4.76e-12
3L	10749008	10749486	8.59	9.32	7.06	2.26	2.64e-12	2.2e-11
X	14824373	14825100	6.86	7.59	5.33	2.26	3.8e-11	2.71e-10
X	15561862	15562438	6.98	7.71	5.45	2.26	5.25e-09	2.86e-08
X	16281535	16282034	9.82	10.54	8.29	2.25	9.29e-18	1.31e-16
2R	25207525	25208344	7.12	7.84	5.59	2.25	9.42e-11	6.43e-10
3L	3035304	3036007	6.66	7.39	5.14	2.25	6.65e-07	2.71e-06
2R	25067844	25069524	9.87	10.6	8.36	2.24	2.76e-20	5.26e-19
2L	8531877	8534111	9.83	10.55	8.31	2.24	1.19e-16	1.51e-15
X	4206883	4207523	8.68	9.4	7.16	2.24	2.37e-16	2.91e-15
X	11423183	11423715	9.03	9.75	7.52	2.24	1.62e-12	1.38e-11
2L	8739097	8739571	8.04	8.76	6.53	2.24	1.21e-10	8.17e-10
2L	6850063	6851462	6.96	7.68	5.44	2.24	3.92e-08	1.89e-07
3R	13070858	13071432	6.54	7.27	5.03	2.24	4.65e-05	0.000139
3R	12384512	12384812	6.15	6.87	4.63	2.24	0.000131	0.000361
3L	1107716	1108194	5.47	6.19	3.95	2.24	0.00314	0.00657
3R	28325445	28325881	9.49	10.21	7.98	2.23	4.25e-18	6.22e-17
X	1129125	1129675	7.36	8.08	5.85	2.23	5.39e-13	4.86e-12
X	6708196	6708508	8.31	9.03	6.8	2.23	3.98e-10	2.55e-09
X	18398934	18399466	6.59	7.31	5.08	2.23	2.23e-05	7e-05
X	9126889	9128446	8.83	9.55	7.33	2.22	2.6e-12	2.16e-11
2R	10852832	10853716	6.68	7.4	5.18	2.22	0.0277	0.0468
3R	20802120	20802943	6.86	7.58	5.36	2.21	1.1e-07	4.99e-07
4	908796	909142	7.62	8.34	6.14	2.2	9.43e-14	9.13e-13
3R	9890759	9891112	9.54	10.26	8.06	2.2	1.58e-10	1.05e-09
2R	9675998	9677324	7.48	8.2	6	2.2	1.7e-09	9.93e-09
X	18560960	18561436	7.37	8.08	5.88	2.2	3.62e-08	1.76e-07
3R	10387050	10387350	5.72	6.43	4.24	2.2	2.57e-05	8e-05
3R	14768680	14770697	8.16	8.87	6.68	2.19	1.38e-14	1.46e-13
3L	20940390	20940705	9.38	10.09	7.9	2.19	2.85e-12	2.36e-11
3L	11050208	11051229	8.92	9.63	7.44	2.19	1.96e-10	1.3e-09
X	22825698	22826587	7.81	8.52	6.34	2.19	0.011	0.0204
3L	19071821	19073128	9.52	10.23	8.05	2.18	8.52e-15	9.13e-14
2R	5852952	5853619	8.23	8.95	6.76	2.18	1.49e-08	7.66e-08
2L	8163391	8164964	8.94	9.65	7.48	2.17	4.23e-13	3.86e-12
2R	22657412	22657923	7.63	8.34	6.17	2.17	7.46e-13	6.6e-12
2R	22385279	22385942	7.16	7.87	5.7	2.17	1.08e-06	4.26e-06
3L	22851676	22852326	6.4	7.12	4.94	2.17	0.000586	0.00142
3L	14842934	14843376	5.38	6.09	3.92	2.17	0.000935	0.00218
2R	6629042	6630478	10.23	10.94	8.78	2.16	4.87e-18	7.1e-17
2L	14495033	14495825	9.99	10.7	8.54	2.16	1.72e-14	1.79e-13
2L	2221221	2221558	9.11	9.82	7.66	2.16	2.4e-11	1.77e-10
X	18614818	18616013	7.25	7.96	5.8	2.16	3.83e-11	2.72e-10
X	16647590	16648897	9.25	9.96	7.8	2.16	5.29e-10	3.34e-09
3R	9432251	9433094	8.68	9.39	7.24	2.15	4.56e-12	3.67e-11
3L	15292451	15295572	10.28	10.98	8.83	2.15	6.94e-09	3.71e-08
3R	4178599	4178910	6.79	7.5	5.34	2.15	6.02e-05	0.000176
2R	15726250	15726950	7.85	8.56	6.41	2.15	0.00413	0.00838
3L	11490126	11491204	8.48	9.18	7.05	2.14	2e-16	2.47e-15
2R	13936261	13937166	11.04	11.74	9.6	2.14	9e-16	1.06e-14
2L	20858767	20859307	8.28	8.98	6.84	2.14	6.37e-12	5.03e-11
2R	15745409	15745889	8.79	9.49	7.36	2.14	5.57e-11	3.89e-10
X	12736704	12737044	8.94	9.64	7.51	2.14	5.68e-09	3.08e-08
2R	20974010	20974373	7	7.71	5.56	2.14	7.6e-09	4.05e-08
X	2857507	2858707	7.06	7.76	5.62	2.14	9.87e-09	5.19e-08
X	16168107	16169083	8.04	8.74	6.6	2.14	0.00517	0.0103
3L	11054079	11054443	6.85	7.55	5.41	2.14	0.0212	0.0367
2L	21202313	21203120	7.41	8.11	5.98	2.13	1.45e-05	4.71e-05
3R	14052368	14052967	9.39	10.1	7.97	2.12	7.61e-15	8.2e-14
X	17321153	17322625	9.17	9.87	7.75	2.12	3.35e-12	2.74e-11
3L	10681822	10682234	7.75	8.46	6.34	2.12	2.65e-11	1.94e-10
X	310196	311258	8.6	9.3	7.18	2.12	3.52e-09	1.97e-08
2R	20696920	20697628	6.88	7.58	5.46	2.12	3.44e-07	1.46e-06
3R	5204424	5205278	8.46	9.16	7.05	2.11	6.92e-14	6.84e-13
3L	17966001	17966788	8.6	9.3	7.19	2.11	2.15e-11	1.59e-10
2R	6219577	6221110	10.47	11.17	9.07	2.1	1.8e-13	1.71e-12
3L	17590683	17591034	7.68	8.38	6.28	2.1	1.95e-07	8.51e-07
2L	9438335	9438746	8.27	8.97	6.87	2.1	0.0107	0.0199
3R	14015282	14017079	8.64	9.34	7.25	2.09	1.69e-15	1.93e-14
2R	12721953	12722448	8.84	9.54	7.45	2.09	2.58e-15	2.9e-14
X	9583651	9584782	10.08	10.78	8.69	2.09	3.16e-15	3.5e-14
2R	6138380	6139457	8.81	9.51	7.42	2.09	1.1e-10	7.47e-10
X	13629151	13629539	8.5	9.2	7.11	2.09	5.47e-08	2.59e-07
3R	10384555	10384944	6.98	7.68	5.58	2.09	1.13e-06	4.46e-06
2R	25195526	25196323	7.19	7.89	5.8	2.09	1.82e-06	6.91e-06
2R	7895523	7895935	6.06	6.76	4.67	2.09	0.000731	0.00174
3L	18770982	18771442	9.55	10.24	8.16	2.08	7.46e-16	8.76e-15
3L	2891116	2891690	7.5	8.19	6.11	2.08	7.28e-12	5.73e-11
X	10814426	10814736	6.59	7.29	5.21	2.08	3.79e-08	1.84e-07
3L	18862326	18862892	6.46	7.15	5.08	2.08	2.35e-05	7.35e-05
X	3748067	3749456	7.15	7.84	5.77	2.07	2.29e-11	1.69e-10
X	17099672	17100284	7.74	8.44	6.36	2.07	3.22e-11	2.32e-10
3L	8546544	8547888	9.52	10.21	8.14	2.07	5.96e-09	3.22e-08
2R	19477303	19477618	8.18	8.87	6.81	2.07	1.32e-06	5.12e-06
2L	19548658	19549160	6.81	7.51	5.44	2.07	4.87e-05	0.000145
2R	14574094	14575287	9.11	9.8	7.74	2.06	3.81e-16	4.6e-15
2L	14219167	14220516	8.71	9.4	7.34	2.06	5.55e-15	6.07e-14
2L	14679064	14681074	9.91	10.6	8.54	2.06	8.55e-13	7.52e-12
3L	1369276	1369958	7.07	7.76	5.7	2.06	4.91e-11	3.45e-10
3L	5840750	5841232	6.66	7.35	5.28	2.06	1.05e-08	5.52e-08
2L	6846544	6848266	12.35	13.04	10.98	2.06	2.1e-08	1.06e-07
X	5095638	5096336	6.38	7.07	5.01	2.06	9.84e-07	3.91e-06
X	7558177	7558972	6.26	6.95	4.88	2.06	3.19e-06	1.17e-05
2L	17238323	17239244	6.22	6.91	4.85	2.06	8.53e-06	2.88e-05
X	20713628	20714162	5.88	6.57	4.51	2.06	1.32e-05	4.33e-05
2L	16470238	16470722	5.4	6.09	4.03	2.06	5.55e-05	0.000163
2L	22049640	22049948	6.1	6.79	4.73	2.06	0.000109	0.000305
X	7382945	7383779	6.18	6.87	4.8	2.06	0.000165	0.000445
3L	15827611	15828466	9.32	10.01	7.96	2.05	4.42e-12	3.57e-11
2L	16492689	16493193	6.95	7.64	5.59	2.05	8.27e-12	6.44e-11
3R	27826200	27827779	7.6	8.29	6.24	2.05	8.05e-11	5.54e-10
3R	19088442	19089221	8.38	9.07	7.01	2.05	2.15e-10	1.42e-09
3L	15020987	15022152	13.63	14.32	12.27	2.05	2.92e-10	1.9e-09
3L	21057990	21058587	9.31	10	7.94	2.05	9.82e-10	5.9e-09
2R	22590490	22591234	8.64	9.33	7.28	2.05	2.19e-07	9.51e-07
3R	25044716	25045047	7.14	7.83	5.78	2.05	2.89e-05	8.92e-05
X	13817623	13818352	7.1	7.79	5.74	2.05	0.000119	0.00033
3R	8105576	8106344	9.37	10.05	8.01	2.04	3.68e-16	4.46e-15
3R	6407043	6407638	8.95	9.63	7.59	2.04	3.03e-14	3.09e-13
3R	19806468	19807617	9.62	10.3	8.26	2.04	5.51e-14	5.49e-13
3R	27835139	27836373	7.94	8.63	6.59	2.04	3.96e-13	3.62e-12
3R	11378234	11379289	7.92	8.61	6.57	2.04	1.25e-11	9.52e-11
3L	10928578	10929749	7.49	8.17	6.13	2.04	2.88e-09	1.63e-08
2L	11293090	11293998	7.01	7.69	5.66	2.04	1.67e-05	5.35e-05
3L	18060528	18060975	5.76	6.45	4.41	2.04	0.000777	0.00184
3L	19025047	19026226	9.21	9.89	7.85	2.04	0.0178	0.0313
2R	24258195	24258495	7.19	7.87	5.84	2.03	1.46e-09	8.62e-09
2L	22059900	22060862	6.62	7.31	5.28	2.03	2.06e-06	7.76e-06
3R	8239590	8240093	6.95	7.63	5.6	2.03	2.37e-05	7.42e-05
3L	16893813	16895179	7.62	8.3	6.28	2.02	2.02e-07	8.79e-07
2L	9508651	9509123	9.86	10.54	8.53	2.01	2.61e-13	2.44e-12
2L	11049821	11050975	10.05	10.73	8.73	2.01	1.52e-11	1.15e-10
2L	14133113	14133728	7.72	8.4	6.39	2.01	4.46e-11	3.15e-10
2L	10019472	10020249	7.04	7.72	5.71	2.01	7.96e-10	4.87e-09
3L	92158	93154	7.62	8.3	6.29	2.01	1.88e-09	1.08e-08
X	18132027	18132327	7.52	8.2	6.2	2.01	2.47e-07	1.06e-06
2R	20120251	20121469	7.22	7.9	5.89	2.01	2.7e-07	1.16e-06
X	14765061	14765520	7.37	8.05	6.05	2	2.93e-12	2.42e-11
X	13103931	13104439	8.6	9.28	7.28	2	2.95e-08	1.46e-07
3R	9934231	9934861	6.48	7.16	5.16	2	1.94e-07	8.5e-07
3L	13121838	13123035	6.68	7.36	5.36	2	1.64e-06	6.28e-06
2L	21034390	21037110	9.73	10.4	8.41	1.99	1.3e-14	1.38e-13
2L	3479716	3480136	7.27	7.94	5.96	1.99	1.04e-10	7.06e-10
X	13225079	13225478	9.75	10.43	8.44	1.99	2.81e-09	1.59e-08
X	5832579	5833128	7.71	8.39	6.4	1.99	1.22e-07	5.52e-07
3R	28314892	28315713	6.85	7.53	5.54	1.99	2.21e-07	9.6e-07
2R	16356939	16357501	6.58	7.25	5.26	1.99	7.58e-06	2.59e-05
X	13236422	13238173	9.08	9.76	7.78	1.98	6.88e-10	4.26e-09
3R	22841828	22842724	8.77	9.44	7.46	1.98	5.39e-09	2.93e-08
3R	19307079	19307847	7.36	8.04	6.05	1.98	8.12e-09	4.31e-08
X	17366723	17367767	7.86	8.54	6.56	1.98	1.26e-08	6.52e-08
3R	21394324	21394881	7.64	8.31	6.33	1.98	1.8e-06	6.85e-06
2L	5091134	5091580	6.66	7.34	5.36	1.98	3.19e-06	1.17e-05
3R	27415944	27416561	8.74	9.41	7.44	1.97	1.01e-13	9.76e-13
3R	22717176	22720291	8.45	9.12	7.15	1.97	2.3e-12	1.93e-11
X	11441761	11442569	8.36	9.03	7.06	1.97	3.71e-09	2.06e-08
2L	2893693	2894743	8.64	9.31	7.34	1.97	7.18e-08	3.35e-07
3L	17606111	17607070	8.18	8.85	6.88	1.97	1.41e-07	6.34e-07
3L	16868584	16868884	6.16	6.83	4.86	1.97	1.37e-05	4.47e-05
3R	21411480	21411870	6.78	7.45	5.49	1.97	0.000165	0.000445
X	8884484	8885176	8.17	8.84	6.88	1.96	9.53e-09	5.03e-08
3R	20914038	20914655	8.83	9.5	7.53	1.96	1.38e-08	7.14e-08
3L	12638321	12638761	10.65	11.31	9.36	1.96	1.94e-07	8.5e-07
3R	23306210	23306815	7.89	8.56	6.6	1.96	1.27e-06	4.95e-06
X	20730430	20731113	5.85	6.52	4.57	1.96	1.98e-05	6.29e-05
3L	1108593	1109426	6.95	7.61	5.66	1.96	0.0282	0.0476
2L	12043649	12045153	10.09	10.76	8.81	1.95	3.49e-13	3.22e-12
2R	10598136	10598647	6.84	7.51	5.56	1.95	2.6e-07	1.12e-06
X	22733386	22733727	6.52	7.18	5.24	1.95	5.94e-07	2.44e-06
3L	7960011	7960311	6.8	7.46	5.51	1.95	3.08e-06	1.13e-05
3R	25173140	25174109	6.78	7.45	5.5	1.95	0.000213	0.000563
3L	17298824	17299204	5.4	6.07	4.12	1.95	0.00168	0.00373
2R	16817329	16817654	5.98	6.65	4.7	1.95	0.00238	0.00512
3R	20318276	20318844	8.95	9.62	7.67	1.94	3.85e-13	3.52e-12
2R	9699756	9701358	9.4	10.07	8.13	1.94	9.77e-13	8.55e-12
3L	7097475	7098745	8.2	8.86	6.92	1.94	5.02e-10	3.19e-09
3L	8688837	8689204	8.79	9.46	7.52	1.94	7.27e-07	2.94e-06
3R	11692084	11692941	7.27	7.93	6	1.94	7.98e-05	0.000229
2L	994675	995245	5.98	6.64	4.7	1.94	0.000187	0.000499
X	8890862	8891474	10.02	10.68	8.76	1.93	5.38e-16	6.43e-15
X	12751601	12752955	8.42	9.08	7.15	1.93	2.75e-12	2.28e-11
2L	18364368	18366346	8.83	9.5	7.57	1.93	4.45e-12	3.59e-11
2R	14334188	14335682	10.39	11.06	9.13	1.93	1.08e-10	7.31e-10
3L	9614419	9614742	8.06	8.72	6.8	1.93	9.98e-07	3.96e-06
2R	15556305	15556736	6.69	7.35	5.42	1.93	0.000349	0.000883
3L	10826567	10827477	9.66	10.33	8.41	1.92	7.11e-16	8.38e-15
3R	30203753	30204288	9.32	9.98	8.06	1.92	5.22e-09	2.85e-08
2L	12011429	12011874	8.27	8.93	7.01	1.92	1.7e-08	8.68e-08
2R	22357729	22359116	7.91	8.57	6.65	1.92	1.65e-07	7.35e-07
3L	12615322	12615945	6.37	7.04	5.11	1.92	2.17e-05	6.83e-05
3L	22372518	22372826	5.6	6.26	4.34	1.92	0.000135	0.000369
2L	4020880	4021372	6.05	6.71	4.79	1.92	0.00179	0.00395
3L	12434193	12434805	7.95	8.62	6.69	1.92	0.0146	0.0263
3L	17462238	17464356	14.7	15.36	13.45	1.91	2.12e-12	1.78e-11
2L	9613565	9614096	11.8	12.46	10.54	1.91	1.66e-10	1.1e-09
2R	5741533	5742197	9.8	10.46	8.55	1.91	9.15e-10	5.53e-09
X	17074908	17075465	7.19	7.85	5.94	1.91	2.18e-06	8.15e-06
3R	15129822	15130160	7.9	8.56	6.65	1.91	3.07e-05	9.42e-05
3R	9395354	9396262	10.92	11.58	9.68	1.9	1.44e-17	1.99e-16
X	16282184	16282530	10.67	11.33	9.43	1.9	2.4e-11	1.77e-10
3L	674929	675454	6.93	7.59	5.69	1.9	5.02e-08	2.39e-07
3L	17624142	17624761	7.45	8.11	6.21	1.9	1.32e-07	5.95e-07
3R	25367199	25368138	7.06	7.72	5.82	1.9	7.89e-07	3.18e-06
X	12078907	12079817	6.53	7.19	5.29	1.9	1.63e-06	6.23e-06
2L	7131823	7132337	7.98	8.64	6.74	1.9	5.6e-06	1.96e-05
3L	7548959	7549296	5.91	6.57	4.67	1.9	7.8e-06	2.66e-05
3R	6979680	6980306	6.79	7.45	5.55	1.9	0.00054	0.00132
3R	26556245	26557153	9.66	10.32	8.43	1.89	8.14e-13	7.18e-12
2R	17458903	17460388	9.63	10.28	8.39	1.89	7.3e-12	5.74e-11
X	17323343	17324792	7.33	7.99	6.1	1.89	1.18e-08	6.13e-08
2R	18948171	18948802	7.8	8.45	6.57	1.89	1.96e-08	9.92e-08
2R	13091555	13092704	9.26	9.91	8.02	1.89	2.4e-08	1.2e-07
3R	14294531	14295420	8.18	8.84	6.95	1.89	5.65e-08	2.67e-07
3L	1093438	1093904	6.68	7.33	5.44	1.89	8.05e-08	3.73e-07
X	13397343	13397644	6.74	7.4	5.51	1.89	8.68e-07	3.48e-06
X	7374717	7375236	7.69	8.34	6.46	1.89	9.88e-07	3.93e-06
X	14673897	14674835	6.85	7.51	5.62	1.89	2.56e-06	9.5e-06
X	13232401	13232912	9.95	10.61	8.73	1.88	4.79e-13	4.35e-12
2R	11395588	11396184	8.01	8.67	6.79	1.88	1.49e-11	1.13e-10
2R	14490112	14490530	8.35	9.01	7.12	1.88	8.14e-09	4.32e-08
3L	8061788	8062811	8.73	9.38	7.5	1.88	6.02e-08	2.84e-07
2R	11383080	11383422	7.2	7.86	5.98	1.88	2.21e-07	9.61e-07
2R	13333634	13334028	7.6	8.26	6.37	1.88	6.95e-07	2.82e-06
2L	11416094	11416469	6.69	7.34	5.46	1.88	2.17e-06	8.13e-06
X	8635559	8635872	7.17	7.82	5.94	1.88	0.000113	0.000314
3L	2118203	2118601	5.52	6.17	4.3	1.88	0.000163	0.000439
4	51907	52392	10.23	10.88	9	1.87	2.68e-14	2.75e-13
2L	12009870	12010674	9.05	9.7	7.83	1.87	4.81e-13	4.36e-12
2L	16526181	16527085	8.59	9.24	7.37	1.87	4.98e-12	3.98e-11
2L	7261555	7263089	7.61	8.26	6.39	1.87	4.99e-09	2.73e-08
3L	3415314	3415798	8.08	8.73	6.86	1.87	1.59e-07	7.08e-07
2L	7387349	7388171	9.06	9.71	7.85	1.87	1.62e-07	7.22e-07
2L	1335760	1336642	6.51	7.16	5.29	1.87	1.5e-06	5.79e-06
X	4446416	4446725	6.01	6.66	4.79	1.87	8.61e-06	2.91e-05
X	10325292	10325920	12.01	12.66	10.8	1.86	1.64e-12	1.39e-11
X	13752713	13754882	11.4	12.05	10.19	1.86	1.23e-09	7.31e-09
3L	8542279	8543755	10.7	11.35	9.49	1.86	1.88e-09	1.09e-08
3R	23333301	23334911	11.41	12.06	10.2	1.86	2.03e-09	1.17e-08
3L	12111017	12112391	8.51	9.16	7.3	1.86	4.28e-09	2.36e-08
3R	20550266	20550988	8.58	9.23	7.38	1.86	1.03e-07	4.73e-07
3L	17923398	17923969	6.63	7.28	5.41	1.86	1.17e-06	4.59e-06
2R	16690340	16691552	6.72	7.37	5.51	1.86	2.42e-06	9.01e-06
X	2094379	2095180	7.38	8.03	6.17	1.86	1.94e-05	6.19e-05
2R	10043782	10045634	9.9	10.54	8.69	1.85	2.65e-13	2.47e-12
X	11520649	11521014	8.61	9.26	7.41	1.85	2.9e-11	2.11e-10
3L	8685058	8685418	9.88	10.53	8.68	1.85	5.71e-11	3.98e-10
3L	15999160	16001745	11.57	12.22	10.37	1.85	9.01e-11	6.16e-10
3R	14469746	14470338	9.18	9.83	7.98	1.85	2e-09	1.15e-08
2R	20037216	20037800	7.69	8.34	6.49	1.85	4.07e-09	2.25e-08
2R	6869301	6869992	7.38	8.02	6.17	1.85	4.36e-06	1.56e-05
3L	13975589	13975889	7.22	7.86	6.01	1.85	9.38e-06	3.14e-05
X	1564714	1565440	6.83	7.48	5.63	1.84	1.9e-06	7.19e-06
X	11439585	11440176	7.15	7.79	5.95	1.84	8.92e-06	3.01e-05
X	2036050	2036653	8.52	9.16	7.33	1.83	3.34e-11	2.4e-10
X	4610763	4611320	8.23	8.87	7.04	1.83	3.9e-10	2.51e-09
X	13234943	13235618	9.08	9.72	7.89	1.83	3.5e-09	1.96e-08
3R	6805476	6806417	8.32	8.96	7.13	1.83	1.97e-06	7.44e-06
3L	16315520	16315897	5.77	6.41	4.58	1.83	0.00954	0.0179
X	9128572	9130716	10.9	11.54	9.73	1.82	1.83e-11	1.37e-10
2R	20531125	20532123	10.14	10.78	8.96	1.82	5.4e-10	3.4e-09
3L	3417193	3419404	12.25	12.89	11.07	1.82	3.18e-08	1.56e-07
3R	25738260	25738560	7.56	8.2	6.39	1.82	9.6e-06	3.21e-05
2L	7809438	7810517	8.89	9.53	7.72	1.81	1.28e-13	1.23e-12
3L	13232135	13232803	8.3	8.94	7.13	1.81	3.21e-09	1.81e-08
2R	9951497	9952109	8.06	8.7	6.89	1.81	3.36e-08	1.65e-07
3R	19583765	19584651	7.47	8.11	6.3	1.81	5.94e-06	2.07e-05
3L	20939022	20939787	8.72	9.36	7.55	1.81	5.94e-06	2.07e-05
2L	19260209	19260939	6.56	7.2	5.39	1.81	3.78e-05	0.000115
2R	22561405	22561967	9.34	9.98	8.18	1.8	1.5e-10	1e-09
3R	8690076	8690789	7.47	8.1	6.3	1.8	5.88e-09	3.18e-08
3R	5321942	5323840	9.65	10.29	8.49	1.8	1.84e-08	9.35e-08
3L	17416202	17416650	8.2	8.84	7.04	1.8	2.27e-08	1.14e-07
2L	9692781	9693081	7.74	8.38	6.57	1.8	2.23e-07	9.66e-07
2R	10832292	10832592	6.61	7.25	5.44	1.8	7.19e-07	2.91e-06
3L	3798316	3798701	5.63	6.27	4.46	1.8	0.000122	0.000337
X	12735401	12736554	9.89	10.52	8.73	1.79	1.19e-11	9.11e-11
2R	17869083	17870919	9.19	9.83	8.04	1.79	1.47e-11	1.11e-10
3L	18757014	18757734	8.95	9.59	7.8	1.79	1.75e-10	1.16e-09
X	11325739	11326808	8.33	8.96	7.17	1.79	8.71e-10	5.29e-09
3R	8894022	8895135	7.94	8.57	6.79	1.79	9.62e-10	5.79e-09
X	13374394	13375596	11.99	12.62	10.83	1.79	6.94e-09	3.71e-08
2L	14554752	14555355	6.6	7.23	5.44	1.79	9.12e-08	4.2e-07
2R	25052745	25054991	8.49	9.12	7.33	1.79	1.5e-07	6.7e-07
3L	11243988	11245064	6.75	7.38	5.59	1.79	2.5e-07	1.08e-06
2L	1650644	1651727	7.8	8.43	6.64	1.79	9.46e-07	3.77e-06
X	17324851	17326390	9.85	10.48	8.69	1.79	4.4e-06	1.57e-05
2L	18340507	18340928	7.01	7.64	5.85	1.79	0.000508	0.00125
3R	10063516	10064988	8.94	9.57	7.79	1.78	2.47e-11	1.82e-10
3R	5672692	5673125	11.34	11.97	10.19	1.78	7.03e-10	4.33e-09
2R	9856579	9857098	8.95	9.58	7.81	1.78	2.93e-08	1.45e-07
2R	17473846	17474362	8.29	8.92	7.14	1.78	4.25e-07	1.79e-06
3L	18787167	18787468	7.36	7.99	6.21	1.78	5.32e-07	2.2e-06
X	3406974	3407449	7.76	8.39	6.61	1.78	7.04e-07	2.86e-06
3L	12046993	12047494	7.64	8.27	6.49	1.78	1.98e-06	7.48e-06
2L	7114605	7115134	6.09	6.72	4.94	1.78	3.63e-06	1.31e-05
X	16929404	16929704	6.62	7.25	5.47	1.78	0.00131	0.00297
X	8891623	8892400	10.55	11.17	9.41	1.77	7.49e-12	5.87e-11
X	5677614	5678019	10.98	11.61	9.84	1.77	1.71e-11	1.29e-10
3R	25770783	25771936	10.74	11.37	9.6	1.77	6.92e-10	4.28e-09
3R	25363611	25364705	9.1	9.72	7.96	1.77	3.71e-08	1.81e-07
3R	23939515	23939957	9.25	9.88	8.11	1.77	3.22e-06	1.18e-05
3L	8003362	8003662	6.33	6.96	5.19	1.77	9.64e-06	3.22e-05
3R	4515067	4515673	5.69	6.32	4.55	1.77	0.000116	0.000323
3L	2457250	2458732	10.37	10.99	9.23	1.76	3.4e-07	1.45e-06
2L	8984289	8984710	6.63	7.26	5.5	1.76	6.81e-07	2.78e-06
2R	1356274	1356637	6.58	7.2	5.44	1.76	1.19e-06	4.65e-06
3R	6782436	6783186	6.88	7.51	5.75	1.76	3.8e-05	0.000115
X	16260349	16260961	6.53	7.16	5.4	1.76	0.000355	0.000898
3R	11388668	11389328	6.17	6.8	5.04	1.76	0.000567	0.00138
2L	8281378	8281681	7.15	7.78	6.01	1.76	0.00071	0.00169
2L	5933256	5934527	9.5	10.13	8.38	1.75	9.46e-13	8.29e-12
2L	13607856	13609836	8.23	8.85	7.11	1.75	5.22e-11	3.66e-10
X	7503477	7504475	8.67	9.29	7.54	1.75	1.11e-10	7.52e-10
X	5082204	5082609	7.16	7.78	6.04	1.75	0.000166	0.000446
2R	20050169	20052246	9.79	10.41	8.67	1.74	1.68e-10	1.11e-09
3L	8460219	8461605	12	12.62	10.88	1.74	1.1e-08	5.74e-08
3R	9881317	9882945	9.11	9.74	7.99	1.74	6.65e-08	3.11e-07
2R	10570143	10570484	7.44	8.07	6.32	1.74	4.97e-06	1.75e-05
X	3059420	3060084	6.16	6.78	5.04	1.74	0.000328	0.000836
X	12672261	12673038	9.24	9.86	8.13	1.73	9.31e-11	6.36e-10
2L	8852079	8852498	7.87	8.49	6.75	1.73	5.22e-09	2.85e-08
3L	14782148	14782948	8.61	9.23	7.5	1.73	6.38e-09	3.43e-08
3L	9128315	9128925	9.96	10.58	8.85	1.73	1.26e-08	6.52e-08
3R	17949797	17950330	8.14	8.76	7.03	1.73	3.5e-08	1.71e-07
3L	15312633	15313420	7.94	8.56	6.83	1.73	6.97e-08	3.25e-07
2R	13719082	13719929	7.14	7.76	6.03	1.73	9.01e-08	4.15e-07
X	4377191	4378250	8.11	8.73	6.99	1.73	1.04e-07	4.74e-07
X	13990320	13991116	8.48	9.1	7.37	1.73	7.66e-07	3.09e-06
3R	10519560	10520341	7.04	7.66	5.93	1.73	1.18e-06	4.63e-06
2L	21961326	21962150	8.25	8.87	7.13	1.73	4.79e-05	0.000143
X	15501888	15502274	7.71	8.33	6.61	1.73	0.000176	0.000472
3L	11242653	11243139	6.29	6.91	5.17	1.73	0.00401	0.00818
3R	21412079	21412383	8.14	8.76	7.04	1.72	6.96e-10	4.3e-09
3L	11120412	11120772	7.67	8.29	6.56	1.72	5.89e-08	2.78e-07
3R	13687054	13687516	8.21	8.82	7.1	1.72	1.52e-06	5.84e-06
X	12892392	12893454	7.69	8.31	6.59	1.72	2.79e-06	1.03e-05
2R	6147042	6147776	7.71	8.33	6.61	1.72	3.42e-05	0.000104
3L	2859417	2859961	5.64	6.26	4.54	1.72	0.000474	0.00117
2L	387885	388381	6.61	7.23	5.51	1.72	0.00113	0.0026
3L	258468	258929	8.88	9.5	7.78	1.72	0.0131	0.0237
3L	4542667	4543679	8.56	9.17	7.46	1.71	6.55e-13	5.84e-12
3R	22046060	22047359	10.43	11.04	9.34	1.71	1.07e-11	8.25e-11
2L	14245164	14246128	8.44	9.05	7.34	1.71	5.77e-08	2.73e-07
2L	10231584	10232185	9.3	9.92	8.2	1.71	3.44e-07	1.46e-06
2L	4197331	4197967	8.58	9.19	7.48	1.71	4.93e-07	2.05e-06
3L	18813975	18815068	7.25	7.86	6.15	1.71	5.82e-07	2.4e-06
3L	9867511	9868002	7.27	7.88	6.17	1.71	2.43e-06	9.05e-06
2R	11511591	11512095	6.39	7.01	5.3	1.71	1.81e-05	5.8e-05
2R	11838186	11838855	10.19	10.81	9.1	1.7	2.84e-12	2.36e-11
2L	19999874	20000868	10.94	11.56	9.85	1.7	4.7e-07	1.97e-06
3L	18295747	18297068	9.43	10.04	8.34	1.7	3.01e-06	1.11e-05
2L	20793146	20793525	8.59	9.2	7.51	1.7	3.71e-06	1.34e-05
X	9637762	9638550	8.01	8.63	6.92	1.7	3.75e-06	1.35e-05
2L	22034874	22036186	7.85	8.47	6.76	1.7	4.65e-05	0.000139
2L	11055142	11055442	5.91	6.53	4.83	1.7	0.000354	0.000895
2L	172900	174398	9.86	10.47	8.78	1.69	5.18e-12	4.13e-11
3R	15457923	15459343	8.44	9.05	7.36	1.69	5.78e-10	3.61e-09
3R	20261814	20263065	10.33	10.94	9.25	1.69	2.76e-09	1.57e-08
2R	11196837	11197150	8.94	9.55	7.86	1.69	1.01e-06	3.98e-06
2R	14705945	14706682	6.52	7.13	5.44	1.69	9.99e-06	3.33e-05
X	7386592	7387501	6.28	6.89	5.2	1.69	7.11e-05	0.000205
3R	12266037	12266563	5.98	6.59	4.9	1.69	0.000544	0.00133
2R	7999725	8000582	8.65	9.26	7.58	1.68	1.72e-11	1.29e-10
2R	6551959	6553954	10.24	10.85	9.17	1.68	4.19e-11	2.98e-10
3R	21853045	21853544	10.45	11.06	9.38	1.68	9.05e-10	5.47e-09
3R	5079836	5081153	8.76	9.37	7.68	1.68	1.43e-08	7.37e-08
X	8573793	8574721	6.75	7.36	5.68	1.68	5.61e-07	2.32e-06
X	517008	517310	6.99	7.6	5.92	1.68	1.1e-05	3.64e-05
3R	13448096	13448873	8.68	9.28	7.6	1.68	6.37e-05	0.000186
X	18311363	18311663	5.2	5.81	4.13	1.68	0.00222	0.00481
3R	15091217	15092380	10.98	11.59	9.92	1.67	2.76e-09	1.57e-08
2R	18689374	18690301	7.94	8.55	6.88	1.67	7.28e-09	3.88e-08
2L	8286865	8288326	8.01	8.62	6.95	1.67	1.17e-08	6.06e-08
3R	4870440	4871906	9.29	9.9	8.23	1.67	1.48e-07	6.63e-07
X	16252573	16254698	10.11	10.71	9.04	1.67	1.61e-07	7.15e-07
3R	4899605	4900518	7.82	8.42	6.75	1.67	6.74e-06	2.32e-05
2L	9693208	9693553	7.58	8.19	6.51	1.67	8.99e-06	3.03e-05
X	11624729	11625280	8.24	8.84	7.17	1.67	3.15e-05	9.66e-05
3L	3580718	3581451	6.84	7.45	5.78	1.67	4.78e-05	0.000143
3R	14422874	14423424	6.34	6.94	5.27	1.67	0.000196	0.000522
2R	16504661	16505273	6.51	7.12	5.45	1.67	0.000203	0.000539
X	16135621	16136280	6.81	7.42	5.75	1.67	0.000222	0.000585
3R	21000792	21001263	6.8	7.4	5.73	1.67	0.000358	0.000904
X	18300819	18301881	9.21	9.81	8.15	1.66	6.58e-13	5.86e-12
3L	19902559	19903803	9.3	9.91	8.25	1.66	3.19e-11	2.3e-10
3R	7138018	7143101	13.22	13.82	12.16	1.66	3.72e-11	2.65e-10
2L	17533972	17535910	10.62	11.22	9.56	1.66	1.49e-09	8.79e-09
X	3021799	3024319	11.67	12.27	10.61	1.66	8.27e-08	3.82e-07
X	7383977	7384288	9.94	10.55	8.88	1.66	1.41e-06	5.44e-06
3L	9678244	9678815	7.2	7.8	6.14	1.66	4.74e-06	1.68e-05
2L	3823296	3824349	7.5	8.1	6.45	1.66	4.14e-05	0.000125
3L	1586783	1587225	10.98	11.58	9.93	1.65	2.76e-12	2.29e-11
3L	626611	627175	13.8	14.4	12.75	1.65	5.04e-11	3.53e-10
3R	8113961	8114427	9.76	10.36	8.7	1.65	1.37e-09	8.13e-09
3L	4413748	4414416	9.25	9.85	8.21	1.65	4.91e-09	2.69e-08
2R	13018899	13019919	11.24	11.84	10.19	1.65	2.79e-08	1.39e-07
3R	6410202	6411699	9.51	10.11	8.46	1.65	2.09e-06	7.85e-06
3R	17603855	17604866	10.74	11.34	9.69	1.65	5.34e-06	1.87e-05
2R	11428113	11428665	6.19	6.79	5.14	1.65	0.000165	0.000444
2L	16620555	16621294	6.44	7.04	5.39	1.65	0.000234	0.000616
3R	30991280	30991580	6.15	6.75	5.1	1.65	0.000514	0.00126
2R	11047195	11047558	7.08	7.68	6.03	1.65	0.000734	0.00175
X	17412604	17413048	6.43	7.03	5.38	1.65	0.00212	0.00461
3L	9091952	9092638	10.66	11.26	9.62	1.64	1.64e-11	1.23e-10
3L	10442078	10442619	10.07	10.67	9.03	1.64	2.99e-10	1.95e-09
2R	12976337	12977403	7.35	7.95	6.31	1.64	4.43e-07	1.86e-06
3R	19859664	19859999	7.97	8.57	6.93	1.64	7.16e-06	2.45e-05
4	854790	855486	7.44	8.04	6.4	1.64	7.88e-06	2.68e-05
3L	7944986	7945616	9.93	10.53	8.88	1.64	9.62e-06	3.21e-05
3L	11048772	11049317	7.03	7.62	5.98	1.64	0.00102	0.00237
3R	30746778	30747192	6.56	7.16	5.52	1.64	0.00117	0.00267
2L	7157319	7157630	5.61	6.21	4.57	1.64	0.00137	0.00309
3L	22564788	22566076	8.79	9.39	7.76	1.63	1.07e-09	6.41e-09
X	13282970	13284796	10.96	11.55	9.92	1.63	1.98e-09	1.14e-08
2R	15747059	15748016	9.16	9.76	8.12	1.63	3.15e-08	1.55e-07
3R	14389239	14390678	10.32	10.92	9.29	1.63	1.08e-07	4.91e-07
X	8580527	8580978	7.11	7.71	6.08	1.63	5.34e-06	1.88e-05
3R	10539707	10540505	8.07	8.66	7.03	1.63	6.08e-06	2.11e-05
2R	14211321	14211629	6.08	6.68	5.05	1.63	4.7e-05	0.00014
3L	10929863	10930922	6.38	6.97	5.34	1.63	9.53e-05	0.000269
2L	14378324	14378881	6.76	7.36	5.73	1.63	0.00251	0.00537
X	18870144	18870746	8.7	9.3	7.68	1.62	1.41e-10	9.44e-10
X	2269945	2270720	11.28	11.87	10.25	1.62	1.14e-07	5.18e-07
2L	18502030	18503069	8.21	8.81	7.18	1.62	1.92e-07	8.44e-07
X	15300004	15300483	9.15	9.75	8.13	1.62	2.47e-06	9.18e-06
2L	2401479	2402172	6.98	7.57	5.95	1.62	2.94e-05	9.06e-05
X	17327768	17328505	7.2	7.8	6.18	1.62	8.78e-05	0.00025
3L	6122373	6122862	6.46	7.05	5.43	1.62	0.000255	0.000665
2R	13583609	13585174	11.96	12.55	10.93	1.61	2.75e-10	1.79e-09
3L	4941016	4941851	8.77	9.36	7.76	1.61	3.86e-10	2.49e-09
2R	22680955	22682737	10.26	10.85	9.24	1.61	5.17e-10	3.27e-09
3R	15222863	15223217	7.5	8.09	6.48	1.61	3.49e-08	1.7e-07
3R	14468669	14469263	9.28	9.87	8.26	1.61	5.39e-08	2.56e-07
3L	14461715	14462257	8.6	9.19	7.58	1.61	5.58e-07	2.3e-06
3L	12319500	12320113	6.93	7.53	5.92	1.61	2.52e-06	9.37e-06
3R	14654569	14655197	6.57	7.16	5.55	1.61	5.27e-06	1.85e-05
X	6705669	6706271	8.47	9.07	7.45	1.61	7.04e-06	2.42e-05
2R	12787055	12787518	6.2	6.79	5.19	1.61	5.45e-05	0.000161
X	17418386	17418712	6.22	6.81	5.2	1.61	9.48e-05	0.000268
2R	18351124	18351602	6.18	6.77	5.16	1.61	0.00011	0.000308
2L	2177409	2179544	12.39	12.98	11.37	1.6	6.31e-13	5.63e-12
3L	4363059	4363848	10.43	11.02	9.42	1.6	2.81e-09	1.59e-08
2L	19901432	19902656	8.67	9.26	7.66	1.6	3.19e-08	1.57e-07
2R	24388640	24388978	6.72	7.31	5.7	1.6	6.52e-07	2.66e-06
3R	19072592	19072985	7.52	8.11	6.51	1.6	7.35e-06	2.52e-05
3L	14639873	14640208	7.04	7.62	6.03	1.6	3.63e-05	0.00011
3R	29420224	29421032	6.57	7.16	5.56	1.6	4.09e-05	0.000123
2L	17386585	17386901	6.67	7.25	5.66	1.6	0.0018	0.00397
X	22818511	22819131	5.79	6.38	4.78	1.6	0.00183	0.00402
X	18917240	18917578	5.67	6.26	4.66	1.6	0.00351	0.00724
2L	19414490	19415820	10.1	10.69	9.1	1.59	1.52e-08	7.81e-08
3R	21659790	21660293	8	8.59	7	1.59	6.28e-08	2.95e-07
2L	6226622	6228780	10.91	11.49	9.9	1.59	7.66e-08	3.56e-07
X	8621037	8622550	7.35	7.93	6.34	1.59	5.89e-06	2.05e-05
X	13994749	13995147	8.05	8.63	7.04	1.59	1.07e-05	3.55e-05
3R	14417647	14418352	7.87	8.46	6.87	1.59	1.4e-05	4.55e-05
X	17175868	17177041	7.41	8	6.41	1.59	2.43e-05	7.59e-05
X	4171080	4171418	6.87	7.46	5.87	1.59	0.000335	0.000851
2L	19359910	19360411	7.03	7.61	6.02	1.59	0.00156	0.0035
2R	25066160	25067201	8.98	9.56	7.98	1.58	1.97e-11	1.47e-10
3R	22788919	22789228	7.52	8.11	6.52	1.58	2.12e-07	9.21e-07
2L	9895223	9895588	10.12	10.71	9.12	1.58	8.61e-07	3.45e-06
3R	21712065	21712525	5.61	6.19	4.61	1.58	0.00231	0.00498
3R	8688721	8689852	10.26	10.84	9.27	1.57	1.68e-09	9.83e-09
2L	8425142	8426723	8.03	8.61	7.03	1.57	1.38e-07	6.21e-07
3R	16982222	16983432	8.99	9.57	8	1.57	1.85e-06	7.03e-06
2L	1451927	1453198	10.61	11.19	9.62	1.57	1.49e-05	4.82e-05
3R	10380216	10381211	6.79	7.37	5.8	1.57	3.88e-05	0.000117
3L	18427295	18427788	6.53	7.11	5.54	1.57	7.5e-05	0.000215
X	3470548	3471160	6.07	6.66	5.08	1.57	9.73e-05	0.000275
3R	26234886	26235265	9.81	10.39	8.83	1.56	2.85e-11	2.08e-10
3R	9923951	9925475	11.31	11.89	10.33	1.56	2.81e-09	1.59e-08
3L	15597712	15598970	10.76	11.34	9.78	1.56	4.33e-08	2.08e-07
3L	85498	88238	14.6	15.18	13.62	1.56	6.82e-08	3.18e-07
2L	10264319	10264686	6.82	7.4	5.84	1.56	1.58e-06	6.04e-06
3L	17009562	17010237	7.56	8.14	6.59	1.56	3.2e-06	1.17e-05
X	12003048	12003899	7.33	7.91	6.35	1.56	7.45e-05	0.000214
2L	7296950	7297911	7.8	8.37	6.81	1.56	0.00107	0.00248
3L	3889667	3889967	6.45	7.02	5.46	1.56	0.0099	0.0185
3R	22852764	22853950	9.62	10.2	8.65	1.55	1.33e-12	1.15e-11
2L	21312902	21313316	9.84	10.42	8.87	1.55	6.23e-09	3.35e-08
3R	10133044	10134020	9.43	10	8.46	1.55	2.79e-08	1.39e-07
3R	29006580	29006985	7.23	7.81	6.26	1.55	1.26e-07	5.71e-07
X	12577702	12578393	9.02	9.59	8.04	1.55	2.35e-07	1.02e-06
3R	27461908	27462738	6.48	7.06	5.51	1.55	3.74e-05	0.000113
2L	21977069	21977725	6.6	7.17	5.63	1.55	0.000532	0.0013
3R	25147480	25148275	7.41	7.98	6.44	1.54	6.17e-08	2.9e-07
3R	9528535	9529456	10.05	10.63	9.08	1.54	6.59e-08	3.09e-07
3L	12405869	12406935	8.94	9.51	7.97	1.54	2.62e-07	1.13e-06
2L	19155975	19157434	11.15	11.72	10.19	1.54	3.67e-06	1.33e-05
3L	15814641	15815458	9.23	9.81	8.27	1.54	9.56e-06	3.2e-05
4	303571	303931	8.17	8.74	7.21	1.54	1.81e-05	5.8e-05
3L	22907819	22908227	7.22	7.79	6.26	1.54	0.000815	0.00192
X	3673517	3674042	6.72	7.3	5.75	1.54	0.00164	0.00365
3L	10352669	10353211	6.59	7.16	5.62	1.54	0.00517	0.0103
2R	14576257	14578632	10.46	11.03	9.51	1.53	1.52e-09	8.92e-09
3L	14196476	14196990	7.49	8.06	6.53	1.53	6.25e-08	2.94e-07
2R	18356342	18358364	8.04	8.61	7.08	1.53	8.11e-08	3.75e-07
3L	18090600	18090907	9.87	10.44	8.92	1.53	1.88e-07	8.28e-07
3R	21158712	21159253	8.15	8.72	7.19	1.53	1.69e-05	5.44e-05
2L	11494401	11494801	6.95	7.52	5.99	1.53	0.00149	0.00336
2L	19896805	19898613	10.25	10.82	9.3	1.52	1.29e-07	5.83e-07
X	22829214	22830875	11.26	11.83	10.31	1.52	1.38e-07	6.2e-07
X	12734334	12735213	8.21	8.78	7.26	1.52	1.75e-07	7.76e-07
2L	18367223	18373036	12.82	13.39	11.87	1.52	1.95e-07	8.51e-07
X	7080857	7084764	14.26	14.83	13.31	1.52	1.21e-06	4.73e-06
3L	1085521	1086432	8.06	8.63	7.11	1.52	1.32e-05	4.33e-05
X	13749906	13750243	8.14	8.7	7.18	1.52	2.42e-05	7.57e-05
X	1118771	1119345	7.75	8.32	6.8	1.52	2.96e-05	9.11e-05
2R	21876020	21877121	8.32	8.89	7.37	1.52	3.43e-05	0.000104
X	4211280	4212115	6.45	7.02	5.5	1.52	0.000243	0.000636
2R	5730545	5730860	5.8	6.37	4.85	1.52	0.00572	0.0113
3R	13060903	13061261	6.03	6.6	5.08	1.52	0.00597	0.0118
2L	5292109	5293540	9.44	10	8.49	1.51	6.17e-10	3.84e-09
2R	20092495	20093682	8.09	8.66	7.15	1.51	2.51e-08	1.26e-07
X	8533788	8534155	8.01	8.58	7.07	1.51	3.11e-08	1.53e-07
2L	12867785	12868170	7.49	8.06	6.55	1.51	6.04e-08	2.85e-07
X	12753742	12754681	10.03	10.6	9.09	1.51	3.54e-07	1.5e-06
X	18522505	18523032	9.36	9.92	8.41	1.51	2.85e-06	1.05e-05
2R	13026335	13026925	7.19	7.76	6.25	1.51	2.89e-06	1.06e-05
2R	13482023	13482324	8.18	8.75	7.24	1.51	4.65e-06	1.65e-05
3R	21430746	21431332	6.87	7.44	5.93	1.51	8.59e-06	2.9e-05
2L	17206350	17206902	7.82	8.38	6.87	1.51	1.98e-05	6.29e-05
3L	6692413	6694083	9.49	10.06	8.56	1.5	1.43e-09	8.48e-09
X	7966198	7966498	7.97	8.53	7.03	1.5	1.07e-08	5.58e-08
X	6031491	6032169	11.65	12.21	10.72	1.5	1.43e-06	5.52e-06
3L	13092665	13096125	10.71	11.28	9.78	1.5	1.94e-06	7.35e-06
3R	31602853	31603499	9.01	9.58	8.08	1.5	3.39e-06	1.23e-05
2R	10484329	10484760	7.24	7.81	6.31	1.5	1.92e-05	6.12e-05
X	8300481	8301390	6.77	7.33	5.83	1.5	2.55e-05	7.95e-05
2R	13723215	13724713	7.73	8.29	6.79	1.5	3.61e-05	0.00011
X	7823592	7824242	7.93	8.49	6.99	1.5	4.24e-05	0.000127
3L	17011983	17012370	7.11	7.67	6.17	1.5	0.000282	0.000728
2R	11912526	11913057	5.9	6.47	4.97	1.5	0.00289	0.00608
3L	11622602	11623172	6.59	7.15	5.66	1.5	0.00344	0.0071
2L	12674429	12675823	12.69	13.25	11.76	1.49	8.68e-11	5.96e-10
3L	9011109	9012607	9.06	9.62	8.13	1.49	1.3e-08	6.69e-08
2L	10614596	10615157	8.27	8.83	7.34	1.49	2.26e-08	1.14e-07
2R	20925130	20928697	9.55	10.11	8.63	1.49	3.27e-08	1.6e-07
3L	1165935	1167171	9.51	10.07	8.58	1.49	1.06e-07	4.84e-07
3L	11416264	11416819	7.94	8.5	7.01	1.49	2.43e-07	1.05e-06
2R	9307596	9308662	10.47	11.03	9.54	1.49	3.84e-07	1.62e-06
X	21368559	21369834	10.81	11.37	9.88	1.49	1.82e-06	6.9e-06
X	8061859	8062962	8.77	9.33	7.84	1.49	2.77e-06	1.02e-05
2L	2896443	2897272	10.47	11.03	9.54	1.49	1.31e-05	4.3e-05
3L	10681092	10681392	7.58	8.14	6.65	1.49	0.000134	0.000367
4	955672	956265	6.37	6.93	5.45	1.49	0.000365	0.000918
3L	7100150	7100735	7.27	7.83	6.34	1.49	0.00048	0.00118
3R	19150008	19150577	7.18	7.74	6.25	1.49	0.000539	0.00132
2R	24741178	24742526	9.16	9.71	8.24	1.48	6.4e-10	3.97e-09
3L	9696798	9697763	9.82	10.38	8.9	1.48	3.13e-08	1.54e-07
3L	15071269	15071940	10.41	10.97	9.49	1.48	3.38e-08	1.65e-07
3L	17971263	17971625	9.1	9.66	8.17	1.48	3.81e-08	1.84e-07
3L	20398724	20399065	9.99	10.55	9.07	1.48	4.22e-06	1.51e-05
3R	9596586	9597267	8.45	9.01	7.53	1.48	4.63e-06	1.65e-05
3R	14708654	14709020	8.29	8.85	7.37	1.48	5.5e-06	1.93e-05
3L	14100161	14101891	8.31	8.87	7.39	1.48	1.03e-05	3.41e-05
3L	8681201	8681603	8.56	9.12	7.64	1.48	3.06e-05	9.39e-05
3R	20239417	20239885	6.44	7	5.52	1.48	0.000439	0.00109
3R	17348736	17349897	6.72	7.28	5.8	1.48	0.000802	0.00189
X	20532254	20533500	10.2	10.76	9.28	1.47	5.5e-08	2.6e-07
2L	3119803	3120446	9.24	9.79	8.32	1.47	4.09e-06	1.47e-05
3R	26226516	26226972	8.24	8.8	7.32	1.47	0.00013	0.000358
3R	23336419	23336816	6.87	7.43	5.96	1.47	0.000167	0.000449
X	14217200	14218565	11.08	11.64	10.18	1.46	1.07e-08	5.58e-08
X	3773461	3774350	9.58	10.13	8.68	1.46	7.16e-07	2.9e-06
2R	16158383	16158946	8.22	8.77	7.31	1.46	6.95e-05	0.000201
3R	7006869	7007660	6.67	7.22	5.77	1.46	0.000128	0.000352
X	17536947	17538078	7.54	8.09	6.63	1.46	0.000198	0.000526
X	10209092	10209869	7.06	7.61	6.15	1.46	0.000478	0.00118
3L	11376351	11376813	5.89	6.45	4.98	1.46	0.00137	0.00309
3L	1929104	1929612	5.73	6.28	4.82	1.46	0.00379	0.00777
X	10641738	10642237	5.73	6.28	4.82	1.46	0.0213	0.0369
3R	19222573	19223757	8.53	9.08	7.64	1.45	5.92e-07	2.43e-06
X	15545894	15547747	8.25	8.8	7.35	1.45	2.19e-06	8.2e-06
2R	5900669	5901180	8.06	8.61	7.16	1.45	6.23e-06	2.16e-05
2L	3104430	3104925	8.12	8.67	7.22	1.45	7.03e-06	2.42e-05
3R	16685829	16686552	6.44	6.99	5.54	1.45	3.35e-05	0.000102
3R	6421172	6422571	7.47	8.02	6.57	1.45	0.00012	0.000331
3R	10650180	10652343	11.62	12.17	10.73	1.44	3.43e-08	1.68e-07
3R	14065836	14066439	10.46	11.01	9.57	1.44	1.87e-07	8.25e-07
3R	26011481	26012033	9.66	10.2	8.77	1.44	3.47e-07	1.47e-06
X	18297776	18298373	8.02	8.57	7.13	1.44	5.94e-06	2.07e-05
2L	6235612	6238355	9.9	10.44	9.01	1.44	1.63e-05	5.24e-05
3R	9001828	9002474	8.12	8.67	7.23	1.44	3.74e-05	0.000113
2L	5107640	5108107	7.54	8.09	6.64	1.44	0.00011	0.000307
3L	9547616	9548111	7.31	7.86	6.42	1.44	0.000502	0.00123
3L	4489051	4489351	5.89	6.44	5	1.44	0.0107	0.0198
2L	482732	484980	11.44	11.99	10.55	1.43	2.05e-09	1.18e-08
2L	18359179	18362308	10.6	11.14	9.71	1.43	1.06e-06	4.2e-06
3L	4611667	4614852	9.56	10.1	8.67	1.43	1.4e-06	5.4e-06
3R	11759955	11760428	8.7	9.24	7.82	1.43	2.65e-06	9.82e-06
X	7332804	7333142	7.06	7.6	6.17	1.43	2.33e-05	7.31e-05
3R	16282288	16283062	7.09	7.63	6.2	1.43	5.02e-05	0.000149
4	742029	742440	7.02	7.57	6.14	1.43	6.24e-05	0.000182
3L	18187299	18187788	7.99	8.53	7.1	1.43	9.39e-05	0.000266
3R	12267949	12269458	7.27	7.81	6.39	1.43	0.000122	0.000337
3R	15301050	15301663	7.77	8.31	6.88	1.43	0.000209	0.000553
3L	21785460	21786133	6.72	7.26	5.84	1.43	0.000499	0.00123
X	4545482	4546629	10.36	10.9	9.48	1.42	4.84e-09	2.66e-08
2L	1911620	1913190	10.51	11.05	9.63	1.42	1.94e-07	8.49e-07
3R	7143426	7143885	7.32	7.86	6.44	1.42	1.37e-06	5.31e-06
2R	25203149	25204387	9.73	10.27	8.85	1.42	3.52e-05	0.000107
X	17503500	17503858	8.49	9.03	7.61	1.42	0.000137	0.000375
X	12323954	12324500	6.84	7.38	5.96	1.42	0.000519	0.00127
3R	23335983	23336283	6.67	7.21	5.79	1.42	0.000568	0.00138
2R	10572017	10572910	9.29	9.83	8.42	1.41	9.99e-08	4.58e-07
2R	21646050	21646640	9.07	9.61	8.2	1.41	1.65e-07	7.35e-07
3R	22259739	22261038	8.87	9.4	8	1.41	1.52e-06	5.84e-06
3R	14715669	14716660	9.2	9.74	8.33	1.41	3.76e-06	1.36e-05
3R	12283718	12285020	7.33	7.87	6.45	1.41	9.04e-06	3.04e-05
2L	18505431	18507583	11.16	11.7	10.29	1.41	1.52e-05	4.93e-05
2R	18321201	18323022	8.96	9.5	8.09	1.41	2.9e-05	8.95e-05
2R	16391776	16392374	6.51	7.05	5.64	1.41	4.45e-05	0.000133
3R	14013376	14013711	7.46	8	6.59	1.41	4.78e-05	0.000142
3L	20606821	20607517	6.62	7.16	5.75	1.41	0.00607	0.0119
3L	19191929	19192466	5.82	6.36	4.95	1.41	0.00839	0.0159
2R	12952841	12953141	6.54	7.07	5.66	1.41	0.0174	0.0307
3R	8108708	8111035	11.79	12.33	10.93	1.4	4.45e-10	2.84e-09
2R	14974788	14977129	9.61	10.15	8.75	1.4	8.85e-08	4.08e-07
2R	20835496	20835990	9.16	9.7	8.3	1.4	7.78e-07	3.14e-06
2L	7528647	7530189	9.76	10.3	8.9	1.4	1.38e-06	5.32e-06
2L	19549263	19550057	8.26	8.8	7.4	1.4	1.03e-05	3.41e-05
X	12671159	12671730	9.28	9.82	8.41	1.4	3.03e-05	9.32e-05
4	967312	968179	6.96	7.5	6.09	1.4	0.000611	0.00148
4	1101218	1101566	6.94	7.47	6.07	1.4	0.00217	0.00469
2L	8602916	8603569	6.19	6.73	5.33	1.4	0.00247	0.00529
2L	13618016	13618316	5.35	5.88	4.48	1.4	0.00551	0.0109
X	13634634	13634956	9.29	9.83	8.43	1.39	2.22e-06	8.33e-06
2L	3628908	3629271	8.52	9.05	7.66	1.39	6.36e-06	2.2e-05
3L	21099713	21100853	7.65	8.18	6.79	1.39	6.9e-05	0.0002
2R	11185121	11185675	7.1	7.64	6.25	1.39	0.000214	0.000567
X	11500340	11500665	8.7	9.24	7.85	1.39	0.000783	0.00185
X	17502260	17503000	7	7.53	6.14	1.39	0.00117	0.00268
2L	10749354	10749654	6.49	7.02	5.63	1.39	0.00192	0.00421
4	788591	789185	7.18	7.72	6.33	1.39	0.00785	0.015
3R	12346816	12347167	5.87	6.4	5.01	1.39	0.0156	0.0279
2R	9429481	9430298	9.65	10.18	8.8	1.38	2.66e-05	8.25e-05
3R	18709548	18711551	9.46	10	8.61	1.38	8.22e-05	0.000235
3L	10364538	10365451	6.48	7.01	5.64	1.38	0.000185	0.000493
2L	18934814	18935493	6.37	6.9	5.52	1.38	0.000368	0.000925
2R	11753789	11754151	6.31	6.84	5.46	1.38	0.0105	0.0196
3R	16220546	16221396	10.45	10.98	9.61	1.37	2.78e-08	1.38e-07
X	12475091	12475634	9.33	9.86	8.49	1.37	5.79e-08	2.73e-07
2L	15908968	15909295	11.62	12.15	10.78	1.37	3.76e-07	1.59e-06
X	16258620	16259879	9	9.53	8.16	1.37	7.58e-07	3.06e-06
3L	16661204	16661516	11.28	11.81	10.44	1.37	1.55e-06	5.94e-06
2L	8851132	8851849	8.02	8.55	7.18	1.37	2.43e-06	9.05e-06
3R	26235765	26237116	8.05	8.58	7.21	1.37	2.49e-06	9.24e-06
3L	8548185	8549741	9.07	9.6	8.22	1.37	6.48e-06	2.23e-05
3R	14708150	14708525	8.27	8.8	7.43	1.37	1.16e-05	3.82e-05
3L	153953	154534	8.89	9.42	8.04	1.37	2.68e-05	8.3e-05
2L	7264985	7265628	7.96	8.49	7.12	1.37	3.02e-05	9.31e-05
3L	21256558	21256987	7.8	8.33	6.96	1.37	9.76e-05	0.000275
3L	11719511	11719949	6.83	7.36	5.99	1.37	0.000268	0.000694
3R	13072947	13073581	6.18	6.71	5.34	1.37	0.000319	0.000815
2R	14705227	14705731	6.38	6.91	5.54	1.37	0.000358	0.000905
3R	19581685	19582310	5.65	6.18	4.81	1.37	0.00256	0.00544
X	5086122	5088539	9.89	10.41	9.05	1.36	9.15e-08	4.21e-07
2L	468970	470008	8.9	9.43	8.07	1.36	6.3e-07	2.58e-06
3L	18845069	18846151	8.88	9.4	8.04	1.36	6.9e-07	2.81e-06
3R	16687061	16687912	7.51	8.04	6.68	1.36	1.55e-05	5e-05
X	11509364	11510449	9.2	9.73	8.37	1.36	2.44e-05	7.61e-05
X	16235514	16236003	6	6.53	5.17	1.36	0.000774	0.00183
3R	27557732	27558211	7.91	8.44	7.07	1.36	0.000807	0.0019
2L	18308023	18308449	5.45	5.97	4.61	1.36	0.00967	0.0181
2L	17746560	17748373	14.36	14.89	13.53	1.35	2.11e-07	9.2e-07
X	7364935	7371721	11.03	11.56	10.21	1.35	9.19e-06	3.09e-05
3L	21061531	21061954	9.29	9.81	8.46	1.35	2.62e-05	8.15e-05
2L	18755373	18755759	8.25	8.78	7.43	1.35	0.000119	0.00033
2R	19423313	19423619	9.35	9.88	8.53	1.35	0.000368	0.000927
3R	9548579	9548931	8.24	8.76	7.42	1.34	1.62e-06	6.21e-06
X	17836374	17837084	7.97	8.49	7.15	1.34	2.88e-06	1.06e-05
2R	19893251	19896000	9.32	9.84	8.5	1.34	2.93e-06	1.08e-05
3R	6991533	6994479	11.93	12.45	11.1	1.34	9.33e-06	3.13e-05
2L	1630117	1631027	7.75	8.27	6.92	1.34	2.14e-05	6.74e-05
2L	14146336	14146927	8.73	9.25	7.91	1.34	0.000389	0.000975
4	1100757	1101087	6.86	7.37	6.04	1.34	0.00392	0.00801
2R	15127648	15131322	14.27	14.79	13.45	1.33	2.23e-08	1.12e-07
3R	9601605	9604866	12.88	13.4	12.07	1.33	3.05e-07	1.3e-06
X	19838825	19839443	8.22	8.73	7.41	1.33	1.02e-05	3.39e-05
X	3679189	3680296	6.99	7.51	6.17	1.33	1.44e-05	4.68e-05
2R	16920153	16920769	8.23	8.75	7.42	1.33	3.91e-05	0.000118
2L	1371416	1372817	7.25	7.77	6.44	1.33	6.1e-05	0.000178
3R	20310206	20311058	8.75	9.27	7.94	1.33	9.82e-05	0.000277
2L	5423687	5425027	9.76	10.28	8.95	1.33	0.000192	0.000511
2R	9652516	9652967	6.58	7.09	5.76	1.33	0.000313	0.000801
2L	8720787	8721410	6.93	7.45	6.12	1.33	0.000521	0.00127
X	13703682	13704033	6.66	7.18	5.84	1.33	0.00127	0.0029
2R	15308503	15309067	11.03	11.55	10.23	1.32	1.52e-05	4.93e-05
2R	20930083	20931718	8.7	9.21	7.89	1.32	4.13e-05	0.000124
3R	23338238	23338619	8.09	8.6	7.28	1.32	7.23e-05	0.000208
2L	18801860	18802620	6.55	7.07	5.75	1.32	0.00127	0.00289
3R	14632825	14633560	6.28	6.79	5.47	1.32	0.00772	0.0148
3L	15362435	15362735	6.21	6.72	5.4	1.32	0.0238	0.0408
X	16780146	16782570	10.84	11.36	10.04	1.31	8.43e-07	3.38e-06
3R	19463626	19464853	8.97	9.48	8.17	1.31	9.42e-07	3.76e-06
3L	2551099	2554249	11.71	12.22	10.91	1.31	8.48e-06	2.87e-05
3L	19631341	19632241	9.28	9.79	8.48	1.31	7.34e-05	0.000211
X	339560	340368	10	10.52	9.21	1.31	9.81e-05	0.000276
3L	12686088	12686879	6.68	7.19	5.88	1.31	0.000189	0.000504
3R	24810889	24811277	7.8	8.31	7	1.31	0.000206	0.000548
3L	21257088	21257455	7.58	8.09	6.78	1.31	0.00086	0.00202
3R	23824080	23824644	6.15	6.66	5.35	1.31	0.00118	0.00269
3L	11124957	11125257	7.41	7.92	6.61	1.31	0.00144	0.00325
3L	1926838	1927156	5.47	5.98	4.67	1.31	0.027	0.0458
2R	20421633	20422453	6.9	7.41	6.11	1.3	7.19e-05	0.000208
2L	164685	165166	9.36	9.87	8.57	1.3	9.23e-05	0.000262
3R	14710965	14711357	8.7	9.21	7.91	1.3	0.000202	0.000536
X	16792138	16792626	8.25	8.76	7.46	1.3	0.000239	0.000629
3L	18250532	18251280	7.97	8.48	7.19	1.3	0.00043	0.00107
2R	12947111	12947527	9.11	9.62	8.32	1.3	0.00088	0.00206
3L	8850119	8850516	6.46	6.97	5.66	1.3	0.00136	0.00308
3R	30735975	30737534	9.11	9.62	8.33	1.29	9.06e-07	3.62e-06
X	11515265	11516867	9.38	9.89	8.6	1.29	7.79e-06	2.66e-05
2L	13516250	13516831	9.36	9.86	8.57	1.29	4.24e-05	0.000127
3R	18707914	18708523	8.59	9.09	7.8	1.29	0.000237	0.000622
2L	19144901	19145481	6.8	7.31	6.02	1.29	0.0056	0.0111
2L	14374726	14376423	8.55	9.06	7.78	1.28	1.76e-06	6.71e-06
3L	10863435	10863883	7.42	7.92	6.64	1.28	2.74e-06	1.01e-05
3L	56339	56735	9.18	9.68	8.4	1.28	0.000623	0.0015
2R	19821288	19821625	6.21	6.72	5.44	1.28	0.00361	0.00744
2L	3805806	3806190	5.94	6.44	5.16	1.28	0.0179	0.0315
2L	14439195	14439729	6.67	7.18	5.9	1.28	0.025	0.0426
2R	6627852	6628892	11.25	11.75	10.48	1.27	7.62e-08	3.54e-07
X	12473485	12474975	11.07	11.57	10.3	1.27	3.21e-07	1.37e-06
2R	22541006	22543985	10.22	10.72	9.45	1.27	1.31e-06	5.09e-06
2L	8735142	8735833	10.61	11.11	9.84	1.27	4.96e-06	1.75e-05
2R	23595786	23596089	9.98	10.48	9.21	1.27	8.83e-05	0.000251
3L	14596106	14596846	7.12	7.62	6.35	1.27	0.000246	0.000644
3L	19940091	19940544	8.09	8.59	7.31	1.27	0.000252	0.000658
2L	7301598	7302464	7.12	7.62	6.35	1.27	0.00103	0.00237
3R	8089623	8090292	6.79	7.28	6.02	1.27	0.00175	0.00386
3L	11719085	11719397	6.41	6.91	5.65	1.27	0.00187	0.0041
2L	19471760	19472251	5.75	6.25	4.98	1.27	0.00306	0.00641
3L	24765859	24766250	6.12	6.62	5.35	1.27	0.00849	0.0161
2R	10125177	10126070	10.23	10.72	9.46	1.26	6.06e-08	2.85e-07
3L	22087955	22090025	10.73	11.23	9.97	1.26	5.1e-07	2.12e-06
3R	16275228	16276215	8.75	9.24	7.98	1.26	1.66e-05	5.34e-05
3L	3551945	3553790	8.82	9.32	8.05	1.26	7.02e-05	0.000203
2L	16268958	16269357	11.41	11.91	10.65	1.26	0.000179	0.00048
2R	2495887	2497020	7.75	8.25	6.99	1.26	0.000363	0.000914
3L	18450059	18452185	10.01	10.51	9.25	1.26	0.00112	0.00258
3L	19567162	19568065	7.54	8.03	6.78	1.26	0.00129	0.00294
3R	7497442	7498258	8.68	9.18	7.92	1.26	0.00249	0.00533
2R	12527951	12528478	6.13	6.63	5.37	1.26	0.0156	0.0279
2L	11447102	11447963	9.14	9.63	8.38	1.25	1.4e-06	5.41e-06
2L	8829769	8833989	11.53	12.02	10.77	1.25	2.24e-06	8.37e-06
3L	20920529	20920911	8.48	8.97	7.72	1.25	6.14e-06	2.13e-05
X	276406	277549	10.83	11.33	10.08	1.25	1.46e-05	4.75e-05
3R	14058016	14058893	10.61	11.1	9.85	1.25	2.53e-05	7.87e-05
3L	15690740	15691623	8.7	9.19	7.94	1.25	6.09e-05	0.000178
3L	4598914	4600322	7.89	8.39	7.14	1.25	7.32e-05	0.000211
X	126970	128045	8.82	9.31	8.06	1.25	0.000129	0.000356
3R	21617881	21618755	8.35	8.84	7.59	1.25	0.000188	0.000502
X	20252230	20253310	9.31	9.81	8.56	1.25	0.000254	0.000662
3R	10661125	10661902	8.41	8.9	7.65	1.25	0.000744	0.00177
2R	15814831	15815474	6.72	7.21	5.96	1.25	0.000773	0.00183
X	600937	601455	7.21	7.7	6.45	1.25	0.000909	0.00212
3R	14712261	14712561	6.76	7.26	6	1.25	0.00254	0.00541
3R	16389646	16390641	7.53	8.03	6.78	1.25	0.00343	0.00709
3R	22147294	22147927	7.09	7.58	6.33	1.25	0.00643	0.0126
3L	21943449	21943765	6.89	7.38	6.13	1.25	0.00654	0.0127
3L	6015233	6015557	5.43	5.93	4.68	1.25	0.0127	0.0231
2L	1243482	1243867	6.39	6.89	5.64	1.25	0.017	0.0301
2L	6183178	6183563	9.77	10.26	9.02	1.24	1.43e-06	5.52e-06
3L	8037546	8038857	8.65	9.14	7.89	1.24	2.27e-06	8.49e-06
3R	14064191	14064537	7.98	8.47	7.22	1.24	3.85e-06	1.39e-05
X	2320565	2320866	7.4	7.89	6.65	1.24	0.000109	0.000304
X	4688357	4689030	10.11	10.6	9.36	1.24	0.000112	0.000311
2R	17131913	17132628	6.67	7.16	5.92	1.24	0.00013	0.000358
3R	9219787	9220197	9.07	9.56	8.32	1.24	0.000501	0.00123
2L	18149587	18150227	11.2	11.69	10.45	1.24	0.000559	0.00136
3L	49304	49775	6.31	6.8	5.56	1.24	0.000636	0.00153
3L	11684553	11684853	6.49	6.98	5.74	1.24	0.00348	0.00718
2R	15734161	15734954	9.02	9.5	8.27	1.23	1.76e-07	7.81e-07
3L	8844475	8845965	9.1	9.59	8.36	1.23	2.14e-06	8.04e-06
3L	7996622	7998479	8.78	9.27	8.04	1.23	1.38e-05	4.51e-05
2L	2861584	2862776	12.04	12.53	11.3	1.23	5.13e-05	0.000152
2L	12549641	12552113	10.59	11.08	9.85	1.23	5.43e-05	0.00016
X	1135068	1135589	7.17	7.66	6.43	1.23	6.65e-05	0.000194
2L	17243836	17244787	7.3	7.79	6.56	1.23	0.000819	0.00193
2L	15776998	15777460	6.53	7.02	5.79	1.23	0.0117	0.0215
3L	14531427	14531909	6.1	6.59	5.36	1.23	0.0199	0.0347
3R	15116155	15117780	8.35	8.84	7.61	1.22	7.58e-07	3.06e-06
4	294114	294907	8.22	8.7	7.49	1.22	5.07e-06	1.78e-05
4	1083661	1084589	7.56	8.05	6.82	1.22	4.23e-05	0.000127
X	17301385	17302067	7.45	7.93	6.71	1.22	0.000251	0.000656
3L	13145115	13145962	7.38	7.87	6.64	1.22	0.000533	0.0013
3L	22844964	22845529	6.83	7.32	6.1	1.22	0.000728	0.00174
2R	15026231	15027234	6.58	7.06	5.85	1.22	0.00234	0.00503
2L	16319533	16320349	7.92	8.41	7.18	1.22	0.00321	0.00669
2R	8207784	8208780	6.59	7.08	5.86	1.22	0.00598	0.0118
3R	28849985	28850619	7.01	7.5	6.27	1.22	0.00655	0.0128
X	13395397	13396120	10.04	10.53	9.32	1.21	1.73e-06	6.61e-06
3L	19204445	19205498	8.77	9.25	8.04	1.21	3.34e-06	1.22e-05
3L	6104132	6106260	11.25	11.73	10.53	1.21	3.2e-05	9.8e-05
X	17028822	17029681	8.53	9.01	7.8	1.21	8.74e-05	0.000249
2L	10388133	10389561	11.52	12.01	10.79	1.21	0.000322	0.000821
3R	29063956	29064644	8.64	9.13	7.91	1.21	0.000417	0.00104
X	10840386	10842179	9.53	10.02	8.8	1.21	0.00169	0.00374
3L	2765193	2765696	7.47	7.95	6.74	1.21	0.0032	0.00668
2R	15056729	15057373	6.74	7.22	6.01	1.21	0.0059	0.0116
2L	17379194	17379563	10.49	10.97	9.77	1.2	1.17e-06	4.61e-06
3R	10264741	10265338	10.65	11.13	9.93	1.2	2.65e-06	9.82e-06
2L	21776490	21776935	11.65	12.13	10.93	1.2	6.08e-06	2.11e-05
3R	9885403	9887471	12.73	13.2	12.01	1.2	2.07e-05	6.55e-05
4	931589	931967	8.7	9.18	7.98	1.2	3.81e-05	0.000115
X	4909528	4909828	6.84	7.32	6.11	1.2	0.000109	0.000305
3L	19155398	19156524	9.78	10.26	9.06	1.2	0.000435	0.00108
2L	12620902	12623322	11.76	12.24	11.04	1.2	0.000913	0.00213
3L	3787113	3787933	9.66	10.13	8.94	1.19	1e-05	3.34e-05
X	12536470	12537238	7.28	7.76	6.57	1.19	5e-05	0.000148
3R	25166649	25167686	7.79	8.27	7.08	1.19	0.000161	0.000434
2L	14231093	14231728	8.81	9.28	8.09	1.19	0.000373	0.000937
X	516101	516858	7.39	7.86	6.68	1.19	0.000663	0.00159
3R	23871532	23871832	6.32	6.8	5.61	1.19	0.00153	0.00342
3R	10644941	10645801	7.35	7.83	6.64	1.19	0.00205	0.00445
2L	11416589	11417068	6.2	6.68	5.49	1.19	0.00694	0.0134
2L	4029522	4030389	8.8	9.27	8.1	1.18	2.15e-05	6.78e-05
3L	12287796	12291036	11.28	11.75	10.58	1.18	4.24e-05	0.000127
3L	15599450	15600072	8.53	9.01	7.83	1.18	0.000134	0.000369
3R	9944984	9945500	8.33	8.8	7.62	1.18	0.000257	0.000667
3L	16407357	16411916	11.52	12	10.82	1.18	0.000275	0.000712
3L	13197781	13198094	7.95	8.43	7.24	1.18	0.000498	0.00122
3R	24608711	24609563	7.73	8.2	7.02	1.18	0.00137	0.00308
X	5636450	5637227	6.09	6.57	5.38	1.18	0.00369	0.00758
2L	3680417	3681161	7.1	7.57	6.39	1.18	0.00692	0.0134
2L	5036678	5037512	13.9	14.37	13.2	1.17	3.21e-07	1.37e-06
2L	7837943	7838859	8.77	9.24	8.07	1.17	3.32e-06	1.21e-05
3L	14985953	14989519	12.03	12.49	11.33	1.17	4.93e-06	1.74e-05
3L	15793892	15795350	10.51	10.98	9.81	1.17	7.85e-06	2.67e-05
3R	16207174	16207801	9.01	9.48	8.31	1.17	1.91e-05	6.08e-05
2L	1450072	1451284	8.75	9.22	8.05	1.17	3.16e-05	9.68e-05
X	5143307	5143677	8.19	8.66	7.49	1.17	8.66e-05	0.000247
2L	20804542	20805293	8.51	8.98	7.81	1.17	0.000356	0.0009
4	1093717	1094861	8	8.47	7.3	1.17	0.0021	0.00456
X	13242762	13243293	5.77	6.24	5.07	1.17	0.0102	0.0189
3L	11411086	11415116	15.23	15.7	14.54	1.16	2.01e-10	1.32e-09
3L	21058896	21059414	10.52	10.98	9.82	1.16	5.56e-07	2.3e-06
X	7339722	7340863	9.8	10.27	9.11	1.16	7.89e-06	2.68e-05
2R	11630059	11631127	9.36	9.83	8.67	1.16	1.56e-05	5.05e-05
X	4909972	4910380	7.23	7.69	6.53	1.16	0.000112	0.000313
2L	14208164	14210097	8.68	9.14	7.99	1.16	0.000348	0.000883
X	10784678	10785619	8.08	8.55	7.38	1.16	0.00039	0.000976
2L	19481624	19482485	6.76	7.23	6.07	1.16	0.00479	0.00962
3L	18836391	18837374	7.32	7.79	6.62	1.16	0.00547	0.0109
2L	16360074	16360442	6.17	6.64	5.48	1.16	0.0169	0.0299
2R	25217632	25218411	6.4	6.87	5.71	1.16	0.017	0.0301
3R	6902444	6902890	5.96	6.42	5.26	1.16	0.025	0.0427
3L	18894726	18896550	10.87	11.33	10.18	1.15	6.45e-06	2.23e-05
2L	5902843	5903355	9.74	10.21	9.05	1.15	2.16e-05	6.8e-05
2R	10680500	10683292	9.86	10.33	9.17	1.15	4.14e-05	0.000125
3R	23300087	23302888	9.88	10.34	9.19	1.15	7.08e-05	0.000205
2L	19379874	19380398	8.09	8.56	7.41	1.15	0.000165	0.000446
3R	30599387	30600134	7.83	8.3	7.15	1.15	0.000199	0.000529
3R	24999898	25001771	8.86	9.33	8.17	1.15	0.000494	0.00122
3R	14653769	14654381	7.14	7.61	6.45	1.15	0.00123	0.0028
X	12183469	12184101	6.73	7.19	6.04	1.15	0.00196	0.00429
2L	12365514	12365961	10.66	11.12	9.97	1.14	9.81e-07	3.9e-06
3L	18018173	18019436	10.26	10.72	9.58	1.14	1e-05	3.34e-05
3L	7360778	7361385	9.26	9.72	8.58	1.14	0.000129	0.000356
2L	13292464	13292911	7.78	8.24	7.11	1.14	0.000241	0.000632
3L	14448107	14448730	7.05	7.51	6.37	1.14	0.000366	0.000922
3L	819383	819836	7.29	7.75	6.6	1.14	0.000573	0.00139
3R	7122152	7122861	11.73	12.19	11.05	1.14	0.000871	0.00204
X	8046558	8047921	7.81	8.27	7.13	1.14	0.00126	0.00288
3L	11426504	11426961	7.36	7.82	6.68	1.14	0.0014	0.00315
2R	13030295	13031170	8.57	9.03	7.89	1.14	0.00166	0.00368
2L	17227495	17228880	10.57	11.02	9.9	1.13	5.37e-05	0.000158
3R	28326395	28327908	11.76	12.22	11.09	1.13	0.000187	0.0005
2R	18305594	18308099	8.96	9.42	8.29	1.13	0.000195	0.000519
3L	457991	458449	8.51	8.97	7.83	1.13	0.000294	0.000756
3L	20279945	20282448	9.31	9.76	8.64	1.13	0.000311	0.000796
3L	8018178	8018970	9.07	9.53	8.4	1.13	0.000313	0.0008
3L	4082644	4084131	7.05	7.5	6.37	1.13	0.000333	0.000849
3L	14192743	14193766	8.11	8.56	7.44	1.13	0.000644	0.00155
3L	14168494	14168990	7.75	8.21	7.08	1.13	0.00241	0.00519
3L	13876565	13876865	6.38	6.83	5.7	1.13	0.00647	0.0126
X	5645984	5647260	10.53	10.98	9.86	1.12	3.26e-05	9.98e-05
3L	16633781	16636937	10.71	11.17	10.05	1.12	0.00019	0.000508
X	2796300	2796661	11.08	11.54	10.42	1.12	0.000742	0.00176
3R	30701266	30702495	7.18	7.63	6.51	1.12	0.000827	0.00195
X	12940276	12942203	12.68	13.13	12.01	1.12	0.000846	0.00199
X	9457201	9457759	6.3	6.75	5.63	1.12	0.00174	0.00384
3L	8580076	8580533	7.59	8.04	6.92	1.12	0.00509	0.0102
X	7492280	7494410	8.63	9.09	7.97	1.12	0.00939	0.0176
X	8861891	8862191	6.27	6.72	5.6	1.12	0.0131	0.0237
3R	19370545	19370955	6.19	6.64	5.52	1.12	0.0252	0.043
3R	21585923	21586812	11.1	11.55	10.44	1.11	2.49e-06	9.26e-06
3L	71531	73783	9.43	9.88	8.77	1.11	4.74e-05	0.000142
X	7706255	7708900	12.09	12.54	11.44	1.11	6.11e-05	0.000178
3L	11336692	11338655	9.85	10.3	9.19	1.11	0.000101	0.000285
3L	6102491	6103721	10.28	10.73	9.62	1.11	0.00013	0.000359
3R	10505697	10507038	9.71	10.16	9.05	1.11	0.000164	0.000441
3R	25307979	25308936	8.12	8.57	7.46	1.11	0.000537	0.00131
X	6614230	6614889	8.65	9.1	7.99	1.11	0.000563	0.00137
2L	9126928	9127453	7.46	7.91	6.8	1.11	0.000606	0.00147
X	8060777	8061699	7.93	8.38	7.28	1.11	0.00136	0.00307
3R	4804401	4806085	9.23	9.68	8.57	1.11	0.00152	0.00342
3R	10863984	10864730	7.29	7.74	6.63	1.11	0.00262	0.00556
3L	13138560	13139172	6.51	6.96	5.85	1.11	0.00284	0.006
3R	10097417	10098050	10.29	10.74	9.64	1.1	1.89e-05	6.03e-05
3R	13428356	13428803	10.24	10.69	9.59	1.1	2.4e-05	7.51e-05
2L	13875802	13879003	11.69	12.14	11.04	1.1	0.00016	0.000434
2L	11045391	11045757	7.92	8.37	7.27	1.1	0.000233	0.000614
3R	5671070	5671600	8.94	9.39	8.29	1.1	0.000242	0.000634
3L	21024734	21027214	12.64	13.09	11.99	1.1	0.000291	0.00075
2L	66844	67899	9.85	10.3	9.2	1.1	0.000373	0.000937
3R	21616785	21617163	7.5	7.95	6.85	1.1	0.000495	0.00122
2L	14266119	14267082	8.7	9.14	8.04	1.1	0.000774	0.00183
3L	4360280	4360596	6.97	7.42	6.31	1.1	0.0012	0.00274
3L	13197288	13197610	8.02	8.46	7.37	1.1	0.00194	0.00425
2L	220486	220863	6.64	7.09	5.99	1.1	0.00249	0.00533
X	4563693	4565070	8.84	9.28	8.19	1.1	0.00275	0.00582
3L	3518760	3519344	7.55	8	6.9	1.1	0.00462	0.00931
2L	16625747	16626161	7.97	8.41	7.32	1.1	0.00491	0.00984
2R	17259639	17260418	6.66	7.11	6.01	1.1	0.0096	0.018
2L	7565545	7566000	6.33	6.77	5.67	1.1	0.0106	0.0197
3R	8111139	8112553	10.75	11.19	10.1	1.09	8.39e-06	2.84e-05
3L	12505945	12506919	8.76	9.2	8.11	1.09	2.11e-05	6.66e-05
2R	10862350	10864158	9.77	10.22	9.12	1.09	3.04e-05	9.35e-05
2R	10496048	10496625	8.26	8.7	7.61	1.09	0.000246	0.000644
3R	9159075	9160514	7.49	7.93	6.84	1.09	0.00065	0.00156
3R	6672687	6673685	8.86	9.31	8.21	1.09	0.000669	0.0016
2L	9450522	9450895	7.77	8.22	7.13	1.09	0.000757	0.0018
2R	13341266	13341638	6.76	7.21	6.11	1.09	0.00203	0.00442
X	18991559	18991982	8.5	8.95	7.86	1.09	0.00308	0.00644
3L	10752335	10752734	6.61	7.06	5.96	1.09	0.00916	0.0172
3R	20989035	20989565	6.09	6.54	5.44	1.09	0.0118	0.0217
X	4201027	4201829	7.51	7.95	6.86	1.09	0.0133	0.024
3R	14738768	14739763	9.84	10.28	9.2	1.08	3.58e-06	1.3e-05
2R	15724917	15725291	7.95	8.39	7.31	1.08	8.44e-05	0.000241
X	3025107	3025975	8.61	9.05	7.97	1.08	0.000134	0.000367
3L	22188959	22189517	9.34	9.78	8.7	1.08	0.000344	0.000873
3R	18244752	18245910	10.4	10.84	9.76	1.08	0.000495	0.00122
3L	18269875	18274195	12.49	12.93	11.85	1.08	0.000931	0.00217
X	13396273	13396859	7.52	7.96	6.88	1.08	0.00145	0.00327
X	10546997	10547943	9.11	9.55	8.47	1.08	0.0022	0.00477
2L	18779052	18779647	6.82	7.26	6.18	1.08	0.00376	0.00771
2L	19343098	19343631	6.07	6.51	5.43	1.08	0.0289	0.0487
2L	3834113	3836515	11.29	11.73	10.66	1.07	1.55e-05	4.99e-05
3R	9704634	9705286	8.84	9.28	8.21	1.07	0.000177	0.000475
3L	7432990	7433562	7.72	8.16	7.09	1.07	0.000298	0.000766
X	17332813	17334216	8.44	8.87	7.81	1.07	0.00193	0.00422
2R	7015840	7016403	8.51	8.95	7.88	1.07	0.00237	0.00509
3R	15611827	15612658	6.69	7.13	6.06	1.07	0.00864	0.0163
3R	30651773	30652485	6.58	7.02	5.95	1.07	0.00958	0.0179
2L	6231946	6232246	6.14	6.58	5.51	1.07	0.0228	0.0392
2L	14225817	14226514	7.53	7.97	6.9	1.07	0.0231	0.0397
2L	16520810	16521895	10.16	10.6	9.53	1.06	7.7e-05	0.000221
3L	1346346	1347691	9.32	9.76	8.7	1.06	0.000294	0.000756
X	2594660	2596033	10.85	11.28	10.22	1.06	0.000378	0.000948
3R	9617157	9618244	7.62	8.06	7	1.06	0.00153	0.00342
3R	15511273	15511936	6.66	7.09	6.03	1.06	0.00206	0.00448
X	17368580	17369972	7.98	8.42	7.35	1.06	0.00273	0.00578
3L	12305072	12305372	6.79	7.22	6.17	1.06	0.00546	0.0108
2L	7844680	7845305	8.33	8.76	7.7	1.06	0.0174	0.0306
X	6699900	6703866	13.74	14.17	13.12	1.05	4.46e-06	1.59e-05
X	19353782	19355717	9.56	9.99	8.95	1.05	8.17e-06	2.78e-05
3L	19895147	19898372	13.23	13.66	12.62	1.05	1.04e-05	3.44e-05
3L	3447413	3448783	9.97	10.4	9.35	1.05	1.97e-05	6.25e-05
3R	5040073	5042598	11.12	11.55	10.5	1.05	4.69e-05	0.00014
2R	11634710	11636226	10.84	11.28	10.22	1.05	4.72e-05	0.000141
X	20651164	20654169	12.26	12.69	11.64	1.05	5.35e-05	0.000158
3L	22023396	22024869	7.32	7.75	6.7	1.05	0.000217	0.000573
X	9077487	9078262	8.06	8.49	7.44	1.05	0.000288	0.000742
X	1545656	1546097	7.56	7.99	6.94	1.05	0.00153	0.00342
2R	16815268	16816045	6.9	7.33	6.28	1.05	0.00282	0.00596
2R	22684257	22684557	6.92	7.35	6.3	1.05	0.0175	0.0309
3R	24565113	24565505	10.36	10.78	9.74	1.04	5.92e-06	2.06e-05
2R	13991802	13992322	9.86	10.28	9.25	1.04	2.31e-05	7.23e-05
3L	10808179	10810385	10.14	10.57	9.53	1.04	0.000273	0.000707
3R	21541492	21542580	10.46	10.89	9.85	1.04	0.000396	0.000991
3R	30709322	30712355	11.1	11.53	10.49	1.04	0.000433	0.00108
3L	15663572	15665010	8.15	8.58	7.54	1.04	0.000928	0.00216
X	22662470	22663073	6.88	7.31	6.27	1.04	0.00404	0.00822
2L	14228840	14229320	7.49	7.91	6.87	1.04	0.00854	0.0162
3L	6776557	6777271	6.7	7.13	6.09	1.04	0.00858	0.0163
X	8862318	8862897	6.95	7.38	6.34	1.04	0.00944	0.0177
2L	3600272	3600627	6.13	6.56	5.52	1.04	0.0111	0.0206
3L	5694294	5694846	6.89	7.32	6.28	1.04	0.0189	0.033
X	10108594	10109133	6.02	6.45	5.41	1.04	0.0229	0.0394
2R	16161604	16162197	10.69	11.11	10.09	1.03	2.58e-05	8.02e-05
3R	4477717	4478935	9.51	9.94	8.9	1.03	5.81e-05	0.000171
2L	2197070	2198381	10.15	10.57	9.54	1.03	6.81e-05	0.000198
3R	13976415	13976776	7.52	7.94	6.91	1.03	0.000219	0.000579
3L	13143381	13144927	9.57	10	8.96	1.03	0.000378	0.000948
3R	30391650	30391960	9.19	9.61	8.58	1.03	0.00038	0.000952
X	2304850	2305409	8.2	8.63	7.59	1.03	0.00135	0.00305
3R	16026512	16027145	6.54	6.96	5.93	1.03	0.004	0.00816
3L	22220657	22221547	7.43	7.85	6.82	1.03	0.005	0.00999
3L	14660643	14661275	6.66	7.08	6.05	1.03	0.00667	0.013
3R	7102653	7103297	6.76	7.18	6.15	1.03	0.00698	0.0135
3L	18319523	18320830	11.16	11.59	10.56	1.02	6.6e-06	2.27e-05
3R	6404703	6405239	12.68	13.1	12.08	1.02	0.0001	0.000282
2R	16586391	16586805	9.37	9.8	8.78	1.02	0.00044	0.00109
3R	9878101	9878487	7.7	8.13	7.1	1.02	0.00121	0.00277
2L	8612288	8613100	8.2	8.63	7.6	1.02	0.00313	0.00653
3L	4433305	4433737	7.25	7.67	6.65	1.02	0.0041	0.00835
X	19285341	19285733	7.4	7.82	6.8	1.02	0.0145	0.026
2L	18561868	18562246	8.47	8.89	7.88	1.01	0.000276	0.000714
2R	21072515	21072887	10.17	10.59	9.58	1.01	0.000296	0.00076
X	6861148	6861988	9.97	10.39	9.38	1.01	0.000297	0.000764
2L	9522666	9523073	8.58	8.99	7.98	1.01	0.000408	0.00102
X	17733910	17734511	8.57	8.99	7.97	1.01	0.00201	0.00438
3R	9767239	9768377	9.05	9.47	8.46	1.01	0.00451	0.00912
2L	7992926	7993995	11.07	11.48	10.48	1	0.000114	0.000316
2L	16271322	16273508	11.26	11.67	10.67	1	0.000154	0.000418
X	17296602	17297556	8.65	9.06	8.07	1	0.000174	0.000466
3L	14129068	14130146	8.9	9.32	8.32	1	0.000267	0.000693
2R	10442187	10442746	9.16	9.58	8.58	1	0.000296	0.000762
3R	5000389	5001174	9.16	9.57	8.57	1	0.000359	0.000905
2L	6423037	6423337	7.86	8.27	7.28	1	0.000474	0.00117
3R	16212548	16212968	7.14	7.55	6.55	1	0.00128	0.0029
2L	8581438	8582067	7.61	8.02	7.02	1	0.00252	0.00538
3R	26759160	26759613	6.57	6.99	5.99	1	0.00305	0.00639
2R	6139645	6140343	7.22	7.63	6.63	1	0.00329	0.00683
2L	3769710	3770377	7.8	8.22	7.22	1	0.00336	0.00696
X	9135882	9137209	8.93	9.34	8.34	1	0.00498	0.00997
2R	6510155	6511022	7.01	7.43	6.42	1	0.00582	0.0115
3R	25589132	25589983	10.55	10.97	9.96	1	0.00645	0.0126
X	14209814	14210243	7.87	8.28	7.28	1	0.00666	0.0129
3R	29461446	29462257	6.44	6.85	5.85	1	0.0106	0.0197
3L	11703216	11703516	6.78	7.19	6.19	1	0.013	0.0236
3L	140246	141358	11.65	12.06	11.07	0.99	0.000139	0.000379
X	19828953	19829863	8.22	8.63	7.64	0.99	0.000144	0.000392
X	17712972	17714032	8.82	9.24	8.25	0.99	0.00167	0.00372
3R	15617863	15618467	8.09	8.5	7.51	0.99	0.00177	0.0039
X	15552351	15553968	8.07	8.48	7.49	0.99	0.00246	0.00527
2R	25214788	25216072	7.68	8.09	7.09	0.99	0.00326	0.00678
2L	14577603	14577903	8.3	8.71	7.72	0.99	0.00374	0.00768
3L	17484326	17485055	7.5	7.91	6.92	0.99	0.00457	0.00922
3L	1885912	1886229	7.04	7.46	6.46	0.99	0.0114	0.0209
X	7701908	7702857	11.51	11.91	10.93	0.98	3.77e-05	0.000114
3L	13209293	13211382	13.64	14.05	13.07	0.98	6.74e-05	0.000196
3R	15984802	15985535	8.02	8.43	7.45	0.98	8.79e-05	0.00025
2R	25223738	25227393	14.24	14.65	13.66	0.98	9.65e-05	0.000272
2L	10057175	10057854	9.3	9.71	8.73	0.98	0.000355	0.000897
2R	19147442	19149063	8.82	9.23	8.25	0.98	0.000429	0.00107
3L	4353796	4354216	12.37	12.78	11.8	0.98	0.00048	0.00118
3R	14480470	14481967	9.32	9.73	8.75	0.98	0.00087	0.00204
2L	18562594	18563034	9.55	9.96	8.97	0.98	0.000905	0.00212
2R	23577853	23578708	7.13	7.54	6.56	0.98	0.00212	0.0046
3R	10649320	10650020	7.33	7.74	6.76	0.98	0.0024	0.00516
3L	7862723	7863712	9.21	9.62	8.63	0.98	0.0024	0.00516
3L	22691153	22691515	8.56	8.97	7.98	0.98	0.0032	0.00668
X	17531411	17531748	8.85	9.26	8.28	0.98	0.0091	0.0171
3L	4411122	4411484	7.61	8.01	7.04	0.98	0.0107	0.0198
X	13748487	13749718	9.47	9.88	8.9	0.98	0.0115	0.0212
3R	29713992	29714604	7.4	7.81	6.83	0.98	0.0232	0.0398
3R	9928194	9929238	9.83	10.23	9.26	0.97	0.000149	0.000405
3L	3556427	3557049	9.96	10.36	9.39	0.97	0.000243	0.000638
3R	20257397	20260466	9.76	10.17	9.2	0.97	0.000251	0.000656
2R	10269013	10270210	9.77	10.18	9.21	0.97	0.00118	0.00271
3L	16710750	16711216	9.89	10.3	9.33	0.97	0.00159	0.00356
3R	21863124	21863576	7.26	7.67	6.7	0.97	0.00166	0.00369
2R	13737360	13738037	8.55	8.96	7.99	0.97	0.00914	0.0172
X	19328391	19328989	6.63	7.04	6.07	0.97	0.013	0.0235
2L	20486700	20487356	6.32	6.72	5.76	0.97	0.0214	0.037
3R	30060200	30060555	7.36	7.77	6.8	0.97	0.0224	0.0385
2R	9544059	9544405	9.87	10.27	9.31	0.96	8.54e-05	0.000244
2L	20822613	20824087	11.48	11.89	10.92	0.96	0.000257	0.000668
3L	22236736	22238976	10.61	11.01	10.05	0.96	0.000457	0.00113
3R	17078067	17078636	10.06	10.46	9.5	0.96	0.000578	0.0014
3R	11604813	11605300	8.19	8.59	7.64	0.96	0.00122	0.00279
X	8532568	8533666	9.32	9.72	8.77	0.96	0.00136	0.00308
X	12263783	12265366	11.78	12.19	11.23	0.96	0.0014	0.00315
3L	13882682	13883099	7.43	7.83	6.87	0.96	0.00392	0.00801
2L	19161649	19162690	8.86	9.27	8.3	0.96	0.00457	0.00922
3L	18374318	18375299	6.6	7	6.04	0.96	0.00858	0.0163
3R	22062886	22063207	7.93	8.33	7.37	0.96	0.00928	0.0174
2R	25112779	25113489	6.96	7.36	6.4	0.96	0.0113	0.0209
2R	22514599	22515313	6.36	6.77	5.8	0.96	0.0116	0.0213
X	6352663	6353905	8.88	9.28	8.32	0.96	0.0125	0.0227
2L	11350681	11351297	6.5	6.91	5.95	0.96	0.0225	0.0387
3R	18584193	18585665	10.07	10.47	9.51	0.95	2.66e-05	8.26e-05
X	11546415	11547284	9.57	9.97	9.02	0.95	5.2e-05	0.000154
2R	25058488	25059667	9.23	9.63	8.68	0.95	5.51e-05	0.000162
3L	2573015	2574554	10.3	10.7	9.74	0.95	0.000158	0.000427
3L	18361279	18363038	9.72	10.12	9.17	0.95	0.00034	0.000864
2R	7528326	7528710	8.73	9.12	8.17	0.95	0.00314	0.00655
2R	15816454	15816877	7.33	7.73	6.78	0.95	0.00473	0.00951
2R	13338512	13339111	8.36	8.76	7.81	0.95	0.00565	0.0112
3L	15675312	15675814	5.98	6.38	5.42	0.95	0.0185	0.0324
3L	5184629	5189162	12.53	12.92	11.98	0.94	0.000224	0.00059
3L	625816	626487	9.61	10.01	9.07	0.94	0.000289	0.000745
2R	15118331	15119563	10.26	10.65	9.71	0.94	0.000336	0.000854
2R	13997130	13997508	9.81	10.21	9.27	0.94	0.000633	0.00153
3R	22159348	22159899	7.77	8.17	7.23	0.94	0.000758	0.0018
2R	11716403	11718822	14.14	14.54	13.6	0.94	0.00131	0.00296
3L	18831989	18832355	7.71	8.11	7.17	0.94	0.00165	0.00367
3L	10658711	10660129	8.27	8.67	7.72	0.94	0.00185	0.00407
X	13821397	13821926	7	7.4	6.45	0.94	0.00222	0.00479
3R	6877909	6879448	8.36	8.75	7.82	0.94	0.00392	0.008
2R	12503907	12504424	8.34	8.73	7.8	0.94	0.00393	0.00802
X	11622806	11623707	8.82	9.21	8.27	0.94	0.00412	0.00837
3L	16853908	16855526	9.54	9.93	8.99	0.94	0.00572	0.0113
2L	11327502	11327884	5.96	6.36	5.42	0.94	0.0241	0.0412
X	8496246	8496917	6.73	7.12	6.18	0.94	0.0295	0.0495
2R	11202347	11204252	10.54	10.93	10	0.93	0.000101	0.000284
3R	19910016	19910560	8.46	8.85	7.92	0.93	0.000246	0.000644
2L	15909795	15911094	9.96	10.35	9.43	0.93	0.000358	0.000904
3R	26917270	26918238	8.65	9.04	8.1	0.93	0.000835	0.00196
3R	12271571	12272509	7.87	8.26	7.33	0.93	0.00198	0.00432
X	12739440	12739901	8.56	8.96	8.02	0.93	0.00201	0.00439
X	864957	866914	7.67	8.06	7.14	0.93	0.00205	0.00447
3R	8354769	8356331	9.91	10.3	9.37	0.93	0.00243	0.00522
3L	4944890	4945672	11.43	11.82	10.89	0.93	0.00251	0.00537
3R	23296863	23297553	8.21	8.61	7.67	0.93	0.00292	0.00615
3L	13154200	13154695	7.13	7.52	6.6	0.93	0.00316	0.0066
2R	13223026	13223768	8.37	8.76	7.84	0.93	0.00676	0.0131
2L	22028145	22029023	8.52	8.91	7.98	0.93	0.00758	0.0146
X	12922378	12922834	5.97	6.36	5.43	0.93	0.0195	0.034
2R	12587199	12588424	11.76	12.15	11.23	0.92	5.69e-05	0.000167
X	5902109	5902409	8.47	8.86	7.94	0.92	0.000346	0.000878
3R	31748642	31749272	8.01	8.4	7.49	0.92	0.001	0.00232
3R	23737508	23738144	9.08	9.47	8.55	0.92	0.00104	0.0024
X	7230226	7232526	9.64	10.02	9.11	0.92	0.002	0.00436
X	17166450	17167784	6.93	7.32	6.4	0.92	0.00463	0.00933
X	7945539	7945839	7.22	7.61	6.69	0.92	0.00738	0.0142
3R	8699786	8700426	6.93	7.31	6.4	0.92	0.00855	0.0162
2L	16274070	16274455	7.59	7.98	7.05	0.92	0.00875	0.0165
3R	12733710	12734196	6.39	6.78	5.86	0.92	0.0139	0.025
X	17374976	17376310	8.69	9.08	8.16	0.92	0.016	0.0285
X	4618459	4619155	8.51	8.9	7.98	0.92	0.0255	0.0434
3R	22162084	22164823	14.42	14.81	13.9	0.91	2.16e-05	6.8e-05
X	1619872	1621896	9.6	9.98	9.08	0.91	0.000158	0.000428
2R	21884294	21886763	10.07	10.45	9.54	0.91	0.000411	0.00102
3L	11119196	11120140	8.58	8.96	8.06	0.91	0.000525	0.00128
3R	23917099	23917906	8.5	8.88	7.97	0.91	0.00159	0.00356
3R	23886233	23889112	11.44	11.82	10.92	0.91	0.00177	0.0039
2R	21643510	21643823	7.81	8.2	7.28	0.91	0.00545	0.0108
2R	18604602	18605833	8.62	9	8.09	0.91	0.00683	0.0132
3L	25312053	25312437	7.01	7.39	6.48	0.91	0.0119	0.0218
2L	3102038	3102607	7.67	8.06	7.15	0.91	0.0125	0.0228
3R	30919782	30922085	10.6	10.98	10.08	0.9	0.000144	0.000392
2R	17845214	17847233	11.53	11.91	11.01	0.9	0.000271	0.000703
2R	16408412	16409336	7.52	7.9	7.01	0.9	0.00194	0.00424
3L	14644688	14645971	12.25	12.63	11.74	0.9	0.00214	0.00464
3R	20256150	20257247	8.69	9.07	8.17	0.9	0.00342	0.00708
3L	22598403	22598916	7.69	8.07	7.18	0.9	0.00358	0.00736
2R	9861840	9862380	8.59	8.97	8.07	0.9	0.00368	0.00756
3R	18411207	18412554	7.86	8.24	7.34	0.9	0.00632	0.0124
3R	23826641	23827319	7.05	7.43	6.53	0.9	0.0064	0.0125
3L	14617601	14618377	8.47	8.85	7.95	0.9	0.0132	0.0239
2L	14568991	14570069	7.08	7.46	6.57	0.9	0.0172	0.0305
3L	6261358	6261852	6.58	6.96	6.06	0.9	0.0264	0.0447
2R	16210380	16214735	12.86	13.24	12.35	0.89	0.000183	0.000489
3L	10676404	10678401	9.02	9.4	8.51	0.89	0.00134	0.00303
2L	16403902	16404681	9	9.38	8.49	0.89	0.00153	0.00342
X	12242875	12243753	7.79	8.17	7.28	0.89	0.0027	0.00573
X	12077860	12078420	7.25	7.63	6.74	0.89	0.00315	0.00657
3L	8852008	8852374	10.5	10.88	9.99	0.89	0.00457	0.00923
3L	22442129	22442750	6.68	7.06	6.17	0.89	0.0174	0.0307
2R	9419619	9420251	9.29	9.66	8.78	0.88	0.00128	0.0029
2R	17396799	17399011	10.63	11.01	10.13	0.88	0.00432	0.00875
3R	8885913	8887548	8.78	9.15	8.27	0.88	0.00482	0.00968
X	8518610	8519632	8.07	8.45	7.56	0.88	0.0055	0.0109
X	20718780	20721910	9.13	9.5	8.62	0.88	0.00688	0.0133
2L	10516134	10516485	9.15	9.53	8.65	0.88	0.00702	0.0136
X	21032567	21033026	7.43	7.81	6.93	0.88	0.00858	0.0163
X	4137995	4138653	6.87	7.24	6.36	0.88	0.0248	0.0423
2R	8004060	8004847	7.99	8.37	7.49	0.88	0.0273	0.0462
3L	22132203	22132731	6.29	6.67	5.78	0.88	0.0291	0.0489
2L	18922924	18927333	12.07	12.44	11.57	0.87	0.000273	0.000707
2R	24276092	24276897	9.71	10.08	9.21	0.87	0.000519	0.00127
3L	10783034	10783731	9.09	9.46	8.59	0.87	0.00533	0.0106
3R	31563049	31564044	7.27	7.64	6.77	0.87	0.00668	0.013
2L	21978112	21978475	6.62	6.99	6.12	0.87	0.0206	0.0359
2L	15913743	15914064	11.19	11.56	10.7	0.86	0.000797	0.00188
2L	10590575	10590986	10.25	10.62	9.76	0.86	0.0013	0.00296
2L	1468869	1471285	10.93	11.29	10.44	0.86	0.00205	0.00446
X	19321149	19322095	8.93	9.3	8.44	0.86	0.00224	0.00484
X	14649017	14650210	10.62	10.98	10.13	0.86	0.00264	0.00561
3R	4811162	4811499	7.41	7.78	6.92	0.86	0.00476	0.00957
2R	11198258	11198590	10.34	10.71	9.85	0.86	0.00637	0.0125
X	1268982	1270782	8.84	9.2	8.35	0.85	0.000955	0.00222
3R	23869540	23870735	8.56	8.93	8.08	0.85	0.00183	0.00402
3R	14283202	14283795	7.43	7.79	6.95	0.85	0.00365	0.0075
X	9121817	9122962	8.4	8.76	7.92	0.85	0.0042	0.00852
3L	95047	95572	7.38	7.75	6.9	0.85	0.00548	0.0109
2L	8841262	8843279	11.88	12.25	11.4	0.85	0.00712	0.0137
3L	675604	676342	8.35	8.71	7.86	0.85	0.0105	0.0194
2R	13191678	13192275	8.2	8.56	7.72	0.85	0.0125	0.0228
X	11493974	11494302	7.55	7.91	7.06	0.85	0.0129	0.0235
X	1947218	1947599	6.55	6.91	6.06	0.85	0.013	0.0235
3L	18897842	18898232	9.47	9.83	8.99	0.84	0.000677	0.00162
2L	15744931	15746605	11.15	11.51	10.67	0.84	0.00143	0.00322
3R	14057017	14057890	11.05	11.41	10.58	0.84	0.00194	0.00425
X	17291195	17292718	8.4	8.76	7.92	0.84	0.00283	0.00598
3L	18445542	18445862	8.72	9.08	8.24	0.84	0.00303	0.00635
X	5679395	5679896	7.66	8.02	7.18	0.84	0.00329	0.00683
X	9585541	9586217	8.78	9.14	8.3	0.84	0.00365	0.0075
X	6253874	6255058	7.83	8.19	7.35	0.84	0.00417	0.00846
3L	17458197	17459672	8.67	9.03	8.19	0.84	0.00501	0.01
2R	25246780	25248673	7.7	8.05	7.22	0.84	0.009	0.017
3L	14783365	14783974	7.76	8.12	7.28	0.84	0.0272	0.046
X	19158840	19161771	12.61	12.97	12.13	0.83	0.000371	0.000934
X	6283208	6283652	7.56	7.92	7.09	0.83	0.00154	0.00344
2L	14675875	14676513	8.72	9.08	8.25	0.83	0.00244	0.00523
2R	13909286	13910776	10.73	11.08	10.26	0.83	0.00246	0.00526
X	3006609	3007962	8.74	9.1	8.26	0.83	0.00946	0.0177
3R	10036039	10036380	8.75	9.1	8.27	0.83	0.00976	0.0182
3L	15677778	15678521	8.85	9.2	8.37	0.83	0.0262	0.0444
3R	19471657	19472012	7.58	7.94	7.11	0.83	0.0273	0.0462
3R	10350494	10350940	10.59	10.95	10.11	0.83	0.0298	0.05
3R	16348122	16348477	9.76	10.12	9.3	0.82	0.000738	0.00176
2R	23870799	23871496	11.33	11.68	10.86	0.82	0.0017	0.00378
3L	11350246	11351487	11.12	11.47	10.65	0.82	0.00178	0.00393
X	17110539	17111030	8	8.35	7.53	0.82	0.00789	0.0151
2L	1445236	1446190	9.8	10.15	9.33	0.82	0.00796	0.0152
3L	19561599	19562343	8.9	9.26	8.44	0.82	0.00843	0.016
2L	14239169	14239660	7.6	7.95	7.13	0.82	0.017	0.03
3R	25586545	25588982	9.48	9.84	9.02	0.82	0.0177	0.0311
3L	20585728	20586449	6.38	6.73	5.91	0.82	0.0297	0.0499
2L	16388561	16390673	11.63	11.98	11.17	0.81	0.000562	0.00137
3L	22379680	22384314	11.32	11.67	10.86	0.81	0.00114	0.00262
3R	31957711	31959355	8.28	8.62	7.81	0.81	0.00278	0.00588
3L	6256452	6256783	9.03	9.38	8.57	0.81	0.00439	0.00889
3R	19930547	19932117	8.89	9.24	8.43	0.81	0.00591	0.0116
X	17651218	17651661	8.32	8.67	7.86	0.81	0.00798	0.0152
3R	26820397	26820834	7.2	7.55	6.74	0.81	0.00855	0.0162
3L	4232531	4233228	8.86	9.21	8.4	0.81	0.00935	0.0175
X	824864	825525	6.99	7.34	6.53	0.81	0.00979	0.0183
3R	9127595	9129435	9.59	9.93	9.12	0.81	0.0121	0.0221
2R	16394634	16396308	10.27	10.62	9.81	0.81	0.0205	0.0356
3L	2417962	2418617	9.72	10.06	9.26	0.8	0.00207	0.00451
3L	3345513	3346226	10.35	10.69	9.9	0.8	0.00288	0.00608
X	20727464	20730079	8.46	8.8	8	0.8	0.00592	0.0117
2R	11598393	11602979	12.89	13.23	12.43	0.8	0.00846	0.0161
3L	17454398	17455051	7.17	7.51	6.72	0.8	0.0174	0.0307
3R	15465561	15466271	8.04	8.38	7.58	0.8	0.0215	0.0371
3R	16274342	16274824	9.13	9.47	8.68	0.79	0.00168	0.00374
X	19842227	19843279	11.48	11.82	11.03	0.79	0.00325	0.00677
X	3033522	3033949	7.35	7.69	6.9	0.79	0.00535	0.0106
2R	23981609	23982056	9.25	9.6	8.8	0.79	0.00637	0.0125
3L	18416938	18417844	7.88	8.22	7.43	0.79	0.0083	0.0158
2L	13176692	13177113	7.4	7.74	6.95	0.79	0.0139	0.025
3L	11493075	11493732	7.82	8.16	7.38	0.79	0.0174	0.0307
2R	14514904	14515845	8.47	8.81	8.03	0.78	0.00278	0.00589
3R	22139951	22142847	9.29	9.63	8.85	0.78	0.00286	0.00603
3L	8458631	8459659	10.94	11.28	10.5	0.78	0.00415	0.00843
3R	21823624	21824141	7.49	7.83	7.05	0.78	0.00549	0.0109
3R	28630429	28631285	10.45	10.79	10.01	0.78	0.00562	0.0111
3R	13893125	13893742	7.68	8.02	7.24	0.78	0.00876	0.0166
X	18592021	18592522	8.05	8.39	7.6	0.78	0.0151	0.027
3L	6940313	6942645	9.21	9.55	8.77	0.78	0.0181	0.0318
X	17483791	17484208	8.1	8.44	7.65	0.78	0.0297	0.0498
3L	16759419	16762150	10.88	11.21	10.45	0.77	0.00117	0.00268
3R	16235021	16236097	10.21	10.54	9.77	0.77	0.00315	0.00657
2L	4091737	4092084	8.03	8.37	7.6	0.77	0.00776	0.0149
3R	10430027	10430495	7.31	7.65	6.88	0.77	0.00979	0.0183
3R	6934620	6937325	10.88	11.22	10.44	0.77	0.00997	0.0186
X	586854	588155	8.51	8.84	8.08	0.77	0.0102	0.019
3R	16678981	16680085	10.02	10.35	9.58	0.77	0.0117	0.0215
3R	13909989	13910433	8.14	8.47	7.7	0.77	0.015	0.0268
3R	31383095	31383427	7.56	7.89	7.12	0.77	0.021	0.0364
X	452011	453039	7.57	7.91	7.14	0.77	0.0287	0.0484
3R	18169221	18169581	9.68	10.01	9.25	0.76	0.000729	0.00174
2L	18772462	18776265	11.72	12.05	11.29	0.76	0.000972	0.00226
X	16553419	16554022	9.13	9.46	8.71	0.76	0.00375	0.0077
2L	14637533	14638057	7.7	8.03	7.27	0.76	0.00384	0.00786
3R	23940309	23940851	11.13	11.46	10.7	0.76	0.00544	0.0108
2R	9404304	9404685	9.34	9.67	8.9	0.76	0.00903	0.017
3L	3777733	3778356	7.33	7.66	6.9	0.76	0.0106	0.0197
3R	8119681	8120261	8.47	8.8	8.04	0.76	0.0108	0.0201
4	607454	607813	12.67	13	12.23	0.76	0.0116	0.0214
3R	4912730	4913347	10.38	10.71	9.95	0.76	0.0118	0.0216
2R	22507454	22508022	9.8	10.13	9.37	0.76	0.0124	0.0225
3R	26934590	26935179	7.38	7.71	6.95	0.76	0.0165	0.0293
X	4193768	4194388	7.88	8.21	7.45	0.76	0.0216	0.0373
3R	5086646	5090489	13.16	13.49	12.74	0.75	0.00157	0.0035
3R	13715948	13717279	8.47	8.8	8.04	0.75	0.00177	0.0039
3R	5075117	5079073	13.41	13.74	12.98	0.75	0.00386	0.0079
2R	23183343	23183692	8.23	8.56	7.81	0.75	0.00697	0.0135
3L	17486929	17487877	8.65	8.98	8.23	0.75	0.00782	0.015
X	19018438	19019965	8.03	8.35	7.61	0.75	0.0123	0.0224
3R	19285830	19286582	8.04	8.36	7.61	0.75	0.0132	0.0239
3L	18832461	18832769	7.66	7.99	7.23	0.75	0.0152	0.0273
3R	5124903	5126349	10.57	10.9	10.15	0.75	0.0158	0.0283
3R	24845896	24847134	11.1	11.43	10.68	0.75	0.0166	0.0294
3R	23345907	23346725	8.12	8.44	7.69	0.75	0.0208	0.036
2L	18483576	18483906	6.6	6.93	6.17	0.75	0.026	0.0441
3L	19063148	19063776	9.08	9.41	8.66	0.75	0.0284	0.0479
2R	22691452	22692052	10.61	10.93	10.19	0.74	0.00157	0.00351
2L	162522	164569	9.34	9.67	8.93	0.74	0.00254	0.00542
2R	16206607	16207179	10.36	10.68	9.95	0.74	0.00353	0.00728
3R	22750912	22751535	9.63	9.96	9.22	0.74	0.00577	0.0114
X	11338846	11339528	10.92	11.25	10.5	0.74	0.00821	0.0156
2R	12172286	12173250	10.08	10.4	9.66	0.74	0.00975	0.0182
3L	15763848	15765315	7.15	7.47	6.74	0.74	0.0146	0.0263
2L	15195513	15196388	8.08	8.4	7.66	0.74	0.0223	0.0384
2R	10538296	10538977	10.89	11.21	10.48	0.73	0.000886	0.00207
3L	9125714	9126294	9.46	9.78	9.05	0.73	0.00217	0.0047
2L	2890923	2892620	9.11	9.43	8.7	0.73	0.00246	0.00526
X	20731400	20733747	11.49	11.82	11.08	0.73	0.00341	0.00707
3R	22523209	22524623	9.7	10.02	9.29	0.73	0.00385	0.00788
3L	19202134	19203051	9.37	9.69	8.96	0.73	0.00525	0.0105
3R	19321489	19322011	9.15	9.47	8.75	0.73	0.00653	0.0127
2R	8635916	8636667	9.71	10.03	9.3	0.73	0.00742	0.0143
X	1897508	1899915	12.07	12.39	11.66	0.73	0.00768	0.0147
X	9617743	9618291	8.31	8.63	7.9	0.73	0.00869	0.0164
2R	12960960	12961577	7.66	7.98	7.25	0.73	0.00946	0.0177
2R	6630607	6631074	8.71	9.03	8.31	0.73	0.0164	0.0292
2R	18690631	18693224	9.21	9.52	8.79	0.73	0.0207	0.0359
2R	9677662	9678725	8.46	8.78	8.05	0.73	0.022	0.038
2L	1396111	1397191	9.72	10.04	9.31	0.73	0.0226	0.0389
2R	21194475	21194834	7.23	7.55	6.82	0.73	0.0253	0.0431
3L	2589497	2591578	14.99	15.31	14.59	0.72	0.000802	0.00189
2L	5972732	5973669	10.96	11.28	10.56	0.72	0.00181	0.00399
2L	15911244	15912767	12.29	12.6	11.89	0.72	0.00348	0.00719
2R	13591401	13593223	11.95	12.27	11.55	0.72	0.00998	0.0186
2R	14222499	14223008	8.32	8.64	7.92	0.72	0.0121	0.0221
3L	14626230	14626890	9.4	9.72	9	0.72	0.0141	0.0254
2R	10291204	10292315	7.67	7.98	7.26	0.72	0.0169	0.03
4	69386	70212	12.56	12.87	12.15	0.72	0.017	0.0301
3L	17972905	17973611	7.62	7.93	7.22	0.72	0.0203	0.0352
3R	30703919	30704984	8.4	8.72	8	0.72	0.0239	0.0409
3R	14442413	14443206	8.36	8.68	7.96	0.72	0.0298	0.05
3L	14640708	14641200	9.45	9.77	9.06	0.71	0.00505	0.0101
3L	14276304	14277204	8.17	8.49	7.78	0.71	0.00689	0.0133
3R	13817381	13817967	8.92	9.24	8.52	0.71	0.0069	0.0134
2L	17254786	17256235	8.52	8.84	8.13	0.71	0.00833	0.0159
2L	11331499	11332932	8.64	8.95	8.24	0.71	0.00939	0.0176
X	10486285	10486585	8.29	8.6	7.89	0.71	0.0161	0.0286
2L	18896371	18897653	11.48	11.79	11.08	0.71	0.0162	0.0287
X	7650970	7651837	9.18	9.5	8.78	0.71	0.0163	0.029
3R	12973729	12974414	7.37	7.68	6.97	0.71	0.0229	0.0394
4	523363	523828	10.42	10.73	10.03	0.7	0.00453	0.00916
3L	14553739	14554143	9.55	9.85	9.15	0.7	0.00694	0.0134
3R	10490489	10492688	10.58	10.89	10.19	0.7	0.011	0.0203
3R	21612555	21613732	9.35	9.66	8.96	0.7	0.0116	0.0213
3R	19465981	19466934	8.86	9.16	8.46	0.7	0.0118	0.0216
3R	30923553	30924333	7.54	7.85	7.14	0.7	0.0222	0.0382
3L	159090	160449	11.24	11.55	10.85	0.7	0.0224	0.0385
3R	9225126	9227408	11.93	12.23	11.54	0.69	0.00173	0.00382
3L	18348990	18353352	13.82	14.12	13.44	0.69	0.0033	0.00684
3L	1441777	1443812	13.2	13.51	12.82	0.69	0.00747	0.0144
3R	10646486	10649158	10.63	10.93	10.24	0.69	0.00763	0.0146
2L	18482656	18483378	8.02	8.32	7.64	0.69	0.0162	0.0288
3R	28600235	28600842	10.11	10.42	9.73	0.69	0.0177	0.0312
3R	14456997	14457358	9.11	9.41	8.72	0.69	0.0207	0.0359
2L	14441653	14444659	11	11.31	10.61	0.69	0.0246	0.042
3L	8832470	8833473	10.7	11.01	10.31	0.69	0.0287	0.0483
3R	4451448	4452487	9.28	9.58	8.9	0.68	0.00472	0.0095
3R	29214560	29216005	11.69	11.99	11.31	0.68	0.00636	0.0125
2R	13498301	13499758	8.4	8.7	8.02	0.68	0.0128	0.0233
3L	18243889	18244189	7.31	7.61	6.93	0.68	0.0167	0.0296
2L	12027236	12027536	7.12	7.42	6.73	0.68	0.0215	0.0372
3R	16553907	16554874	9.4	9.7	9.02	0.68	0.0219	0.0378
3L	4491025	4492449	9.83	10.12	9.45	0.67	0.00342	0.00707
3L	707598	708222	9.88	10.18	9.51	0.67	0.0107	0.0198
3R	27440903	27442944	10.81	11.11	10.44	0.67	0.013	0.0236
3L	14197140	14197535	8.79	9.09	8.41	0.67	0.0183	0.0321
X	15161498	15162908	8.83	9.13	8.46	0.67	0.0193	0.0337
2L	21000954	21002379	7.76	8.05	7.38	0.67	0.02	0.0349
3L	16474720	16477139	9.59	9.89	9.22	0.67	0.0219	0.0377
3R	29459232	29460094	7.91	8.21	7.54	0.67	0.0276	0.0467
X	6868496	6869088	10.64	10.93	10.27	0.66	0.00493	0.00988
3L	11419527	11423195	12.03	12.32	11.66	0.66	0.0131	0.0237
3L	21059551	21059983	9.52	9.81	9.15	0.66	0.0192	0.0336
2R	15886515	15887119	8.64	8.93	8.27	0.66	0.02	0.0348
3R	10456265	10456691	9.87	10.16	9.5	0.66	0.0209	0.0362
3L	11547352	11548272	9.17	9.47	8.81	0.65	0.00663	0.0129
3R	5036370	5037200	11.36	11.65	11	0.65	0.00803	0.0153
3R	16280909	16281810	7.89	8.18	7.52	0.65	0.0136	0.0246
3R	18980752	18981379	9.64	9.93	9.28	0.65	0.0208	0.036
X	19013120	19015769	12.22	12.51	11.86	0.65	0.0217	0.0374
X	8670824	8673728	11.65	11.94	11.29	0.65	0.0227	0.0391
2L	15401368	15403535	8.37	8.66	8.01	0.65	0.0257	0.0437
2R	10806933	10808053	10.28	10.57	9.92	0.65	0.0274	0.0463
2R	6536165	6538238	12.55	12.84	12.2	0.64	0.00629	0.0123
3L	10682734	10683896	11.52	11.8	11.17	0.64	0.00739	0.0142
3R	9346730	9349229	11.25	11.53	10.9	0.63	0.00815	0.0155
X	17124115	17125271	9.84	10.12	9.49	0.63	0.0105	0.0195
3L	13917303	13920359	11.59	11.87	11.23	0.63	0.0128	0.0233
X	10533209	10534352	7.99	8.28	7.64	0.63	0.0164	0.0292
2L	3831143	3832419	11.84	12.13	11.49	0.63	0.0269	0.0455
3L	19073328	19074000	7.49	7.77	7.14	0.63	0.0283	0.0477
3L	11254252	11255245	9.75	10.03	9.41	0.62	0.00842	0.016
2R	21526720	21528052	11.79	12.07	11.45	0.62	0.0108	0.02
2L	7914710	7915051	8.3	8.58	7.96	0.62	0.0126	0.023
3L	20929419	20931361	10.14	10.42	9.8	0.62	0.0161	0.0286
2R	9441059	9442096	11.19	11.47	10.85	0.62	0.0193	0.0337
3L	20197809	20198375	9.34	9.62	9	0.62	0.0243	0.0415
3R	5099080	5099788	9.82	10.09	9.48	0.61	0.0103	0.0191
2L	6840055	6843843	12	12.27	11.67	0.61	0.0163	0.029
3R	5571221	5572908	12.07	12.35	11.73	0.61	0.0169	0.0299
3R	16252485	16253336	12.53	12.81	12.2	0.61	0.0183	0.0321
4	612251	613405	10.4	10.67	10.06	0.61	0.0194	0.0338
2R	6131939	6135818	11.23	11.5	10.9	0.6	0.0122	0.0223
4	517060	518407	9.86	10.13	9.53	0.6	0.0229	0.0393
3L	14323683	14326431	10.4	10.66	10.07	0.59	0.00583	0.0115
3R	4659761	4660542	9.12	9.38	8.79	0.59	0.0188	0.0328
3L	19901682	19902455	9.21	9.48	8.89	0.59	0.0201	0.035
X	19289376	19289730	10.1	10.36	9.77	0.59	0.0208	0.0361
3L	18626029	18627564	8.4	8.67	8.08	0.59	0.0216	0.0373
2R	13998644	14000844	10.03	10.3	9.7	0.59	0.0254	0.0432
3L	20529674	20532476	11.38	11.64	11.06	0.58	0.0121	0.0221
X	15593151	15593682	9.85	10.12	9.53	0.58	0.0141	0.0254
2R	6221988	6224209	12.24	12.5	11.92	0.58	0.0159	0.0283
2L	11973109	11975993	10.13	10.39	9.81	0.58	0.0273	0.0462
X	12740051	12740908	8.83	9.09	8.51	0.58	0.0298	0.05
2R	10583012	10584713	9.52	9.77	9.2	0.57	0.00896	0.0169
2L	14685679	14687819	11.45	11.71	11.14	0.57	0.0178	0.0313
2L	20758224	20758836	11.69	11.94	11.37	0.57	0.0252	0.0429
X	1121645	1122654	10.61	10.86	10.3	0.57	0.0275	0.0464
2L	20994230	20996103	12.71	12.96	12.41	0.56	0.0291	0.0488
[truncated: 8 more rows]
